# Supplementary material for: SiCl4mediated one-pot synthesis of novel spirobibenzopyrans as potent anticancer agents
Source: Royal Society of Chemistry journal article supplement (doi:10.1039/c8nj06444j), 2019-01-01
Supplement: c8nj06444j1.pdf [file c8nj06444j1.pdf]

## SiCl<sub>4</sub> mediated one-pot synthesis of novel spirobibenzopyrans as potent anticancer agents

Swayamsiddha Kar<sup>1</sup>, Naveen Shivalingegowda<sup>2</sup>, Lokanath Neratur Krishnappagowda<sup>3</sup>, Nageswara Rao Golakoti<sup>1\*</sup>

<sup>1</sup>Department of Chemistry, Sri Sathya Sai Institute of Higher Learning, Prasanthi Nilayam, Andhra Pradesh, India-515134

<sup>2</sup> Department of Physics, School of Engineering & Technology, Jain University, Bangalore 562 112.

<sup>3</sup>Department of Studies in Physics, Manasagangotri, University of Mysore, Mysuru 570 006, India.

Supporting information:

### 1. Synthesis

The spirobibenzopyrans were synthesized by stirring a mixture of the ketone (0.01 mol), the required substituted salicylaldehyde (0.02 mol), and SiCl<sub>4</sub> (silicon tetrachloride, 0.03 mol) in absolute ethanol (20ml) under nitrogen atmosphere. The above reaction mixture was stirred till the completion of the reaction indicated by formation of solid (generally white in color) in the reaction vessel. After completion the contents were poured into ice to quench the catalyst and stirred for 15 minutes. The solid was filtered, washed with water, dried and recrystallized from distilled chloroform. If there was formation of a colored solid in the reaction vessel, the reaction was worked up in the similar manner as mentioned before. The coloured solid obtained was then suspended in diethyl ether (20 mL) and to it 20 mL of aqueous ammonia was added. The suspension was shaken vigorously and the ether layer was separated, dried over anhydrous Na<sub>2</sub>SO<sub>4</sub>. Then the ether layer was evaporated to obtain a crude solid which was recrystallized from distilled acetone or chloroform. The compounds synthesized along with their sample code and yield shown in **SD table I** below.

**SD Table I:** Structure, IUPAC names, % yield and melting points of the synthesized spirobibenzopyrans.

| CODE    | IUPAC NAME                                           | SUBSTITUENT                                | YIELD (%) |
|---------|------------------------------------------------------|--------------------------------------------|-----------|
| CHP-SAL | 6,7,8,9-tetrahydrocyclohepta[1,2-b:1,7-b']dichromene | R <sup>1</sup> = -H<br>R <sup>2</sup> = -H | 90        |

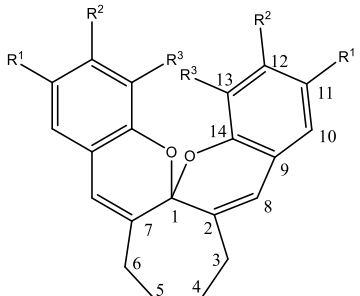

|                     |                                                                            |                                                                     |    |
|---------------------|----------------------------------------------------------------------------|---------------------------------------------------------------------|----|
| <b>CHP-4MO-SAL</b>  | 2,13-dimethoxy-6,7,8,9-tetrahydrocyclohepta[1,2-b:1,7-b']dichromene        | R <sup>1</sup> = -H<br>R <sup>2</sup> = -OCH <sub>3</sub>           | 64 |
| <b>CHP-5MO-SAL</b>  | 3,12-dimethoxy-6,7,8,9-tetrahydrocyclohepta[1,2-b:1,7-b']dichromene        | R <sup>1</sup> = -OCH <sub>3</sub><br>R <sup>2</sup> = -H           | 84 |
| <b>CHP-5Cl-SAL</b>  | 3,12-dichloro-6,7,8,9-tetrahydrocyclohepta[1,2-b:1,7-b']dichromene         | R <sup>1</sup> = -Cl<br>R <sup>2</sup> = -H                         | 88 |
| <b>CHP-5Br-SAL</b>  | 3,12-dibromo-6,7,8,9-tetrahydrocyclohepta[1,2-b:1,7-b']dichromene          | R <sup>1</sup> = -Br<br>R <sup>2</sup> = -H                         | 86 |
| <b>CHP-DiCl-SAL</b> | 1,3,12,14-tetrachloro-6,7,8,9-tetrahydrocyclohepta[1,2-b:1,7-b']dichromene | R <sup>1</sup> = -Cl<br>R <sup>2</sup> = -H<br>R <sup>3</sup> = -Cl | 69 |
|                     |                                                                            |                                                                     |    |
| <b>CHX-SAL</b>      | 7,8-dihydro-6H-chromeno[3,2-d]xanthene                                     | R <sup>1</sup> = -H<br>R <sup>2</sup> = -H                          | 40 |
| <b>CHX-4MO-SAL</b>  | 2,12-dimethoxy-7,8-dihydro-6H-chromeno[3,2-d]xanthene                      | R <sup>1</sup> = -H<br>R <sup>2</sup> = -OCH <sub>3</sub>           | 33 |
| <b>CHX-5MO-SAL</b>  | 3,11-dimethoxy-7,8-dihydro-6H-chromeno[3,2-d]xanthene                      | R <sup>1</sup> = -OCH <sub>3</sub><br>R <sup>2</sup> = -H           | 81 |
| <b>CHX-5Cl-SAL</b>  | 3,11-dichloro-7,8-dihydro-6H-chromeno[3,2-d]xanthene                       | R <sup>1</sup> = -Cl<br>R <sup>2</sup> = -H                         | 86 |
| <b>CHX-5Br-SAL</b>  | 3,11-dibromo-7,8-dihydro-6H-chromeno[3,2-d]xanthene                        | R <sup>1</sup> = -Br<br>R <sup>2</sup> = -H                         | 78 |
| <b>CHX-DiCl-SAL</b> | 1,3,11,13-tetrachloro-7,8-dihydro-6H-chromeno[3,2-d]xanthene               | R <sup>1</sup> = -Cl<br>R <sup>2</sup> = -H<br>R <sup>3</sup> = -Cl | 75 |

## 2. Instrumentation

The <sup>1</sup>H NMR spectra were obtained on VARIAN 200 MHz, <sup>13</sup>C NMR on VARIAN 50 MHz for CHP-SAL, CHP-4MO-SAL, CHP-5Cl-SAL, and CHP-5Br-SAL, for CHP-5MO-SAL and CHX-4MO-SAL the <sup>1</sup>H NMR spectra were obtained on VARIAN 500 MHz, and <sup>13</sup>C NMR on VARIAN 125 MHz and finally the <sup>1</sup>H NMR spectra were obtained on VARIAN 400 MHz, and <sup>13</sup>C NMR on VARIAN 100 MHz for CHP-DiCl-SAL and all the remaining CHX derivatives. TMS was used as the internal standard and CDCl<sub>3</sub> as the solvent. For mass spectra AGILENT 6430 Triple Quad LC/MS was employed. The FT-IR spectra were recorded between 400 and 4000 cm<sup>-1</sup> using KBr

pellets employing Thermo-Nicolet Avatar 370 spectrophotometer. UV-Vis spectra in methanol were recorded in the wavelength range 200-600 nm using Shimadzu 2450 spectrophotometer.

For HPLC Agilent 1260 Infinity high performance liquid chromatography system, equipped with a quaternary solvent deliver system, inline degasser, autosampler and photo diode array detector, was used. A Waters Nova - Pak C18 (3.9mm X 150mm) connected with a Zorbax C18 guard column (20 mm × 4 mm, 5 μm) was applied for all analyses. Detection wavelengths were set at the respective  $\lambda_{\text{max}}$  for each compound (characterization data). The mobile phase A consisted of water and mobile phase B was acetonitrile. A flow rate of 1 ml/min was maintained and the elution was conducted using a linear gradient mode as shown in supplementary (SD table 1 and 2). The separation was carried out at 25 °C with an injection volume of 20 μl and samples were analyzed in triplicate. Spectral characteristics of eluted peaks were recorded using diode array detector from 200 to 700 nm.

Single crystals of suitable dimensions were chosen carefully for X-ray diffraction studies. The X-ray intensity data were collected at a temperature of 293(2) K on a Bruker Proteum2 CCD diffractometer equipped with an X-ray generator operating at 45 kV and 10 mA, using  $\text{CuK}\alpha$  radiation of wavelength 1.54178 Å. Data were collected for 24 frames per set with different settings of  $\varphi$  (0° and 90°), keeping the scan width of 0.5°, exposure time of 2 s, the sample to detector distance of 45.10 mm and  $2\theta$  value at 46.6°. The complete data sets were processed using *SAINT PLUS*<sup>1</sup>. The structures were solved by direct methods and refined by full-matrix least squares method on  $F^2$  using *SHELXS* and *SHELXL* programs<sup>2</sup>. The geometrical calculations were carried out using the program *PLATON*<sup>3</sup>. The molecular and packing diagrams were generated using the software *MERCURY*<sup>4</sup>.

### 3. Characterization

The <sup>1</sup>H-COSY for the –CH<sub>2</sub>- protons is shown in figure I.

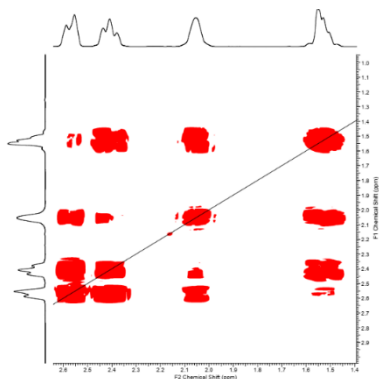

**SD Figure I. 2D-COSY of CHP-SAL zoomed to view the –CH<sub>2</sub>- protons**

From the contour of the signal it is evident that the signals at  $\delta$ 2.56 and  $\delta$ 2.41 are the geminal hydrogens H-3a, H-3b / H-6a, H-6b. Also the fact that both the signals couple with the other signals appearing at  $\delta$ 2.05 and  $\delta$ 1.53 which are H-4 and H-5 respectively indicate that they are indeed geminal hydrogens. It is further confirmed by two more facts: one, there is a small amount of

allylic coupling observed with the signal at  $\delta 2.41$  with the H-7 at  $\delta 6.70$  which is absent for the signal at  $\delta 2.56$  (shown in figure IIa). This tells us that one of the hydrogens is projecting outward the cycloheptanone ring with the allylic coupling (Ha) and the other hydrogen is inwards having no allylic coupling (Hb). Fact two, from the HMQC spectra shown in figure IIb it is clear that the signals at  $\delta 2.56$  and  $\delta 2.41$  are for 2 hydrogens each H-3a, H-6a and H-3b, H-6b corresponding to C3 and C6 which appear at the same value of  $\delta 32$  in the  $^{13}\text{C}$ -NMR spectrum. Additionally, from the Gaussian studies we obtained the theoretical NMR values which upon analysis showed that indeed the protons H-3a and H-3b, H-6a and H-6b to have different chemical shift values. The calculation table is given in supplementary section as SD table 4. Our theory of the difference in chemical environment of H-3a and H-3b is finally confirmed by the single crystal XRD structure shown in **figure III** for **CHP-5Cl-SAL** where the H-3a and H-6a protons are outward and the H3b and H6b protons are inwards. Similar observation can be made from the single crystal XRD structure of **CHP-5MO-SAL** shown in figure IV. We thus understand the non-equivalence of the protons at H3/H6 in the **CHP** system using the spectroscopic techniques.

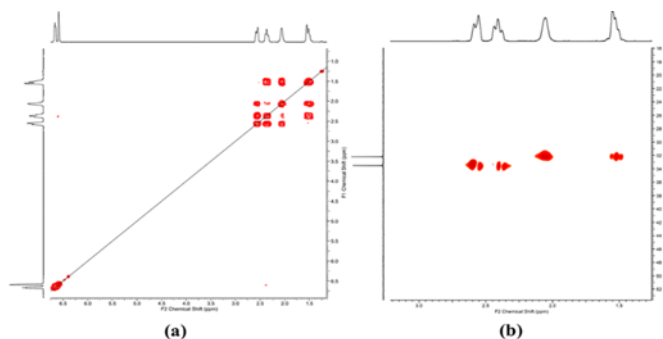

**SD Figure II. (a) 2D-COSY of CHP-SAL zoomed to view the allylic coupling. (b) 2D-HMQC of CHP-SAL zoomed to view the  $-\text{CH}_2-$  region**

Characterization data of the synthesized spirobibenzopyrans:

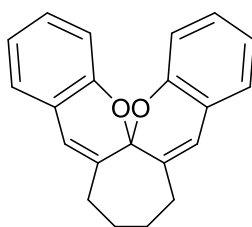

**CHP-SAL:** Colorless solid. M.P.: 215-216 °C;  $^1\text{H-NMR}$ (200 MHz,  $\text{CDCl}_3$ )  $\delta$ , ppm = 7.20 (t, H-12,  $J=7.0$  Hz), 7.10 (d, H-10,  $J=7.0$  Hz), 6.95 (t, H-11,  $J=7.0$  Hz), 6.8(d, H-13,  $J=7.0$  Hz), 6.70 (s, H-8), 2.60 (m, H-3b and H-6b,  $J=6.4$  Hz), 2.40 (m, H-3a and H-6a), 2.10 (m, H-4), and 1.55 (m, H-5);  $^{13}\text{C-NMR}$ (150 MHz,  $\text{CDCl}_3$ )  $\delta$ , ppm = 150(C14), 136 (C2, C7), 130(C12), 126 (C10), 124 (C11), 122 (C8), 121 (C9), 116(C13), 107 (C1), 34(C4, C5), and 32 (C3, C6); IR (KBr disc): 3061-w (alkene C-H stretch), 2920-m (aliphatic C-H stretch), 1604-s (C=C stretch), 1575, 1557-m (aromatic skeletal bands), 1437 (aromatic C-H bend), 1374-m, 1247-s, 1141-s (C—O stretch), 795-s, 753-s (C-H oop bend); UV-vis ( $\text{CHCl}_3$ )  $\lambda_{\text{max}}$  nm: 241, 298; Mass:  $m/z$   $[\text{M}]^+= 302.0$

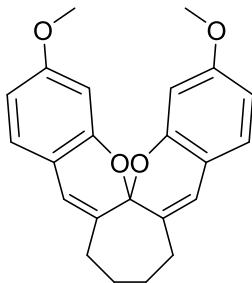

**CHP-4MO-SAL:** Pale colored solid. M.P.: 168.2-169.1 °C; <sup>1</sup>H-NMR(200 MHz, CDCl<sub>3</sub>) δ, ppm = 7.25 (s, H-8), 7.06 (d, H-10), 6.61 (m, H-11), 6.40 (d, H-13), 2.52-2.39 (m, H-3 and H-6), 2.04 (m, H-4), 1.50 (m, H-5), and 3.71 (s, -OCH<sub>3</sub>); <sup>13</sup>C-NMR(50 MHz, CDCl<sub>3</sub>) δ, ppm = 160(C12), 151 (C14), 132(C2, C7), 126 (C8), 123 (C1), 114 (C9), 108 (C11), 102 (C13), 101 (C9), 33 (C4, C5), and 32 (C3, C6); IR (KBr disc): 3065-w (alkene C-H stretch), 2919-m (aliphatic C-H stretch), 1614-s (C=C stretch), 1572-m, 1463-s (aromatic skeletal bands), 1438-s, 1372-s (aromatic C-H bend), 1325-s, 1272-s, 1117-s (C—O stretch), 908-s, 864-s, 768s (C-H oop bend); UV-vis (CHCl<sub>3</sub>) λ<sub>max</sub> nm: 240, 278; Mass: m/z [M]<sup>+</sup>= 362.0

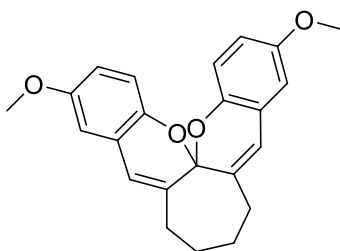

**CHP-5MO-SAL:** Pale yellow solid. M.P.: 180.2-180.9 °C; <sup>1</sup>H-NMR(500 MHz, CDCl<sub>3</sub>) δ, ppm = 7.20 (s, H-8), 6.71 (d, H-13, J=7.8 Hz), 6.69 (d, H-12, J=7.8 Hz), 6.61 (s, H-10), 2.55 (m, H-3b and H-6b), 2.40 (m, H-3a and H-6a), 2.05 (m, H-4), 1.52 (m, H-5), and 3.77 (s, -OCH<sub>3</sub>); <sup>13</sup>C-NMR(101 MHz, CDCl<sub>3</sub>) δ, ppm = 154 (C11), 144 (C14), 136 (C2, C7), 122 (C8), 121 (C9), 119 (C12), 117 (C13), 111 (C10), 102 (C1), 34 (C4, C5), 32 (C3, C6), and 56 (-OCH<sub>3</sub>); IR (KBr disc): 3051-w (alkene C-H stretch), 2927-m (aliphatic C-H stretch), 1616-m (C=C stretch) 1581-m, 1487-s (aromatic skeletal bands), 1451-s 1433-s (aromatic C-H bend), 1311-s, 1200-s, 1141-s (C—O stretch), 955-s, 880-s, 750-s (C-H oop bend); UV-vis (CHCl<sub>3</sub>) λ<sub>max</sub> nm: 243, 321; Mass: m/z [M+H]<sup>+</sup> = 363.1592

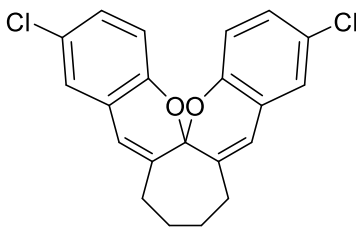

**CHP-5Cl-SAL:** White solid. M.P.: 127-128 °C; <sup>1</sup>H-NMR (200 MHz, CDCl<sub>3</sub>) δ, ppm = 7.13 (s, H-10), 7.09 (d, H-12, J=8 Hz), 6.71 (d, H-13, J=8 Hz), 6.60(s, H-8), 2.55 (m, H-3b and H-6b), 2.37 (m, H-3a and H-6a), 2.06 (m, H-4), and 1.55 (m, H-5); <sup>13</sup>C-NMR(50 MHz, CDCl<sub>3</sub>) δ, ppm = 148 (C14), 137 (C2, C7), 129 (C12), 127 (C11), 126 (C10), 123 (C9), 118 (C13), 114 (C8), 101

(C1), 34 (C4, C5), and 32 (C3, C6); IR (KBr disc): 3060-w (alkene C-H stretch), 2926-m (aliphatic C-H stretch), 1634-m (C=C stretch), 1560-m (aromatic skeletal bands), 1479-s, 1445-s (aromatic C-H bend), 1362-s, 1229-s, 1181-s (C—O stretch), 1077-m, 1052-s (Aromatic -Cl stretch), 875-s, 749-s, 716-s (C-H oop bend); UV-vis (CHCl<sub>3</sub>)  $\lambda_{\text{max}}$  nm: 242, 308; Mass: m/z [M-H]<sup>+</sup> = 370.0, [M-H+2]<sup>+</sup> = 372.0

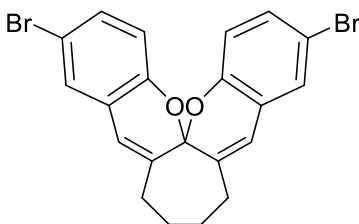

**CHP-5Br-SAL:** White solid. M.P.: 120-122 °C; <sup>1</sup>H-NMR (200 MHz, CDCl<sub>3</sub>)  $\delta$ , ppm = 7.40 (s, H-10), 7.30 (d, H-12, J=7.7 Hz), 6.70 (d, H-13, J=7.7 Hz), 6.60 (s, H-8), 2.60 (m, H-3b and H-6b), 2.40 (m, H-3a and H-6a), 2.00 (m, H-4), and 1.60 (m, H-5); <sup>13</sup>C-NMR (50 MHz, CDCl<sub>3</sub>)  $\delta$ , ppm = 148 (C14), 136 (C2, C7), 132 (C12), 128 (C10), 125 (C1), 123 (C11), 119 (C13), 117 (C8), 114 (C9), 34 (C4, C5), and 32 (C3, C6); IR (KBr disc): 3059-w (aromatic C-H stretch); 2927-s (aliphatic C-H), 1633-m (C=C stretch); 1476 - s, 1419 -m (aromatic C-H bend), 1339-m (CH<sub>3</sub> bend); 1286-m, 1228-m, 1179-m, 1126-m (C—O stretch); 1067-m, 1054-m (Ar-Br stretch); 852-s, 682-s (C-H oop). UV-vis (CHCl<sub>3</sub>)  $\lambda_{\text{max}}$  nm: 242, 309; Mass: m/z [M]<sup>+</sup> = 460.0 and [M+2]<sup>+</sup> = 462.0

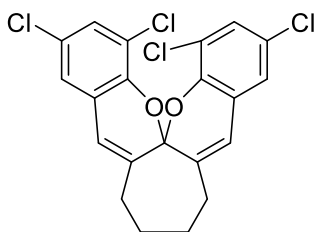

**CHP-DiCl-SAL:** Pale white solid. <sup>1</sup>H-NMR (400 MHz, CDCl<sub>3</sub>)  $\delta$ , ppm = 7.20 (d, H-10, J=2.8Hz), 7.06 (d, H-12, J=2.8Hz), 6.63 (s, H-8), 2.63 (m, H-3b and H-6b), 2.39 (m, H-3a and H-6a), 2.09 (m, H-4), and 1.54 (m, H-5); <sup>13</sup>C-NMR (100 MHz, CDCl<sub>3</sub>)  $\delta$ , ppm = 144 (C14), 137 (C2, C7), 129 (C12), 128 (C11), 125 (C13), 124 (C9), 123 (C10), 122 (C8), 101 (C1), 33 (C4, C5), and 31 (C3, C6); IR (KBr disc): 3040-w (alkene C-H stretch), 2920-m (aliphatic C-H stretch), 1610-s (C=C stretch), 1577-m, 1465-s (aromatic skeletal bands), 1440-s, 1373-s (aromatic C-H bend), 1320-s, 1275-s, 1110-s (C—O stretch), 910-s, 866-s, 770s (C-H oop bend); UV-vis (CHCl<sub>3</sub>)  $\lambda_{\text{max}}$  nm: 240, 278; Mass: m/z [M - H]<sup>+</sup> = 439, [M - H + 2]<sup>+</sup> = 441

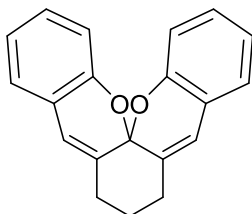

**CHX-SAL:** White solid. M.P.: 160-161 °C; <sup>1</sup>H-NMR (400 MHz, CDCl<sub>3</sub>) δ, ppm = 7.22 (2H, d, H-9, J=7.4 Hz), 7.16 (2H, t, H-11, J=7.4 Hz), 7.02 (2H, t, H-10, J=7.4 Hz), 6.92 (2H, d, H-12, J=7.4 Hz), 6.69(2H, s, H-7), 2.53 (4H, t, H-3 and H-5, J=6.5 Hz), and 1.82 (2H, m, H-4, J=6.5 Hz); <sup>13</sup>C-NMR (100 MHz, CDCl<sub>3</sub>) δ, ppm = 150.0 (C13), 132.0 (C2, C6), 129.0 (C11), 126.0 (C9), 122.0 (C10), 121.8 (C8), 121.3 (C7), 117.0 (C12), 96.0 (C1), 26.0 (C3, C5), and 20.0 (C4); IR (KBr disc): 3150 cm<sup>-1</sup> -w (sp<sup>2</sup> C-H stretch); 2920-m (aliphatic C-H), 1606-m, (C=C stretch); 1572 - s, 1481 -m, 1455 -m (aromatic C-H bend), 1219-m, 1124-m, (C—O stretch); 751-s (C-H oop). UV-vis (CHCl<sub>3</sub>) λ<sub>max</sub> nm: 259, 296; Mass: m/z [M]<sup>+</sup> = 288.0

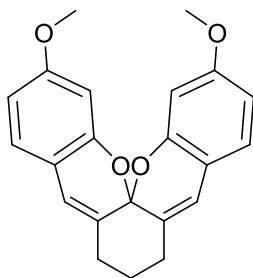

**CHX-4MO-SAL:** White solid. M.P.: 168.2-169.1 °C; <sup>1</sup>H-NMR(500 MHz, CDCl<sub>3</sub>) δ, ppm = 7.20 (s, H-7), 6.71 (d, H-9, J=7.8 Hz), 6.69 (d, H-10, J=7.8 Hz), 6.61 (s, H-12), 2.49 (t, H-3 and H-5), 1.78 (quintet, H-4), and 3.72 (s, -OCH<sub>3</sub>); <sup>13</sup>C-NMR (125 MHz, CDCl<sub>3</sub>) δ, ppm = 160.0 (C13), 151.0 (C11), 129.0 (C10), 126.2 (C2, C6), 121.4 (C9), 115.8 (C8), 108.3 (C7), 102.0 (C12), 96.0 (C1), 55.4 (-OCH<sub>3</sub>), 26.0 (C3, C5), and 20.0 (C4); IR (KBr disc): 3065-w (alkene C-H stretch), 2919-m (aliphatic C-H stretch), 1614-s (C=C stretch), 1572-m, 1463-s (aromatic skeletal bands), 1438-s, 1372-s (aromatic C-H bend), 1325-s, 1272-s, 1117-s (C—O stretch), 908-s, 864-s, 768s (C-H oop bend); UV-vis (CHCl<sub>3</sub>) λ<sub>max</sub> nm: 240, 278; Mass: m/z [M + H]<sup>+</sup> = 349.1

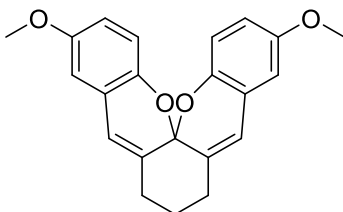

**CHX-5MO-SAL:** White solid. <sup>1</sup>H-NMR(400 MHz, CDCl<sub>3</sub>) δ, ppm = 7.20 (s, H-7), 7.06 (d, H-12, J=6 Hz), 6.74 (d, H-11, J=6 Hz), 6.62 (s, H-9), 2.39 (t, H-3 and H-5), 1.79 (quintet, H-4), and 3.78 (s, -OCH<sub>3</sub>); <sup>13</sup>C-NMR (100 MHz, CDCl<sub>3</sub>) δ, ppm = 154.5 (C13), 143.9 (C10), 136.9 (C11), 132.7.2 (C2, C6), 128.4 (C9), 124.3 (C8), 123.2 (C7), 12.07.0 (C12), 95.9 (C1), 55.7 (-OCH<sub>3</sub>), 32.0 (C3, C5), and 33.0 (C4); IR (KBr disc): 3065-w (alkene C-H stretch), 2919-m (aliphatic C-H stretch), 1614-s (C=C stretch), 1572-m, 1463-s (aromatic skeletal bands), 1438-s, 1372-s (aromatic C-H bend), 1325-s, 1272-s, 1117-s (C—O stretch), 908-s, 864-s, 768s (C-H oop bend); UV-vis (CHCl<sub>3</sub>) λ<sub>max</sub> nm: 240, 278; Mass: m/z [M + H]<sup>+</sup> = 349.1

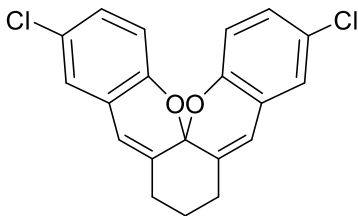

**CHX-5Cl-SAL:** White solid.  $^1\text{H-NMR}$ (200 MHz,  $\text{CDCl}_3$ )  $\delta$ , ppm = 7.17 (d, H-9,  $J=2\text{Hz}$ ), 7.10 (dd, H-11,  $J=2\text{Hz}$ ,  $J=8\text{Hz}$ ), 6.73 (d, H-12,  $J=8\text{Hz}$ ), 6.61 (s, H-7), 2.51 (t, H-3 and H-5), and 1.81 (quintet, H-4);  $^{13}\text{C-NMR}$  (50 MHz,  $\text{CDCl}_3$ )  $\delta$ , ppm = 148.2 (C13), 133.1 (C10), 128.5 (C2, C6), 126.9 (C11), 125.8 (C9), 123.1 (C8), 121.4 (C7), 118.1 (C12), 96.0 (C1), 26.4 (C3, C5), and 20.3 (C4); IR (KBr disc): 3065-w (alkene C-H stretch), 2919-m (aliphatic C-H stretch), 1614-s (C=C stretch), 1572-m, 1463-s (aromatic skeletal bands), 1438-s, 1372-s (aromatic C-H bend), 1325-s, 1272-s, 1117-s (C—O stretch), 908-s, 864-s, 768s (C-H oop bend); UV-vis ( $\text{CHCl}_3$ )  $\lambda_{\text{max}}$  nm: 240, 278; Mass:  $m/z$   $[\text{M} - \text{H}]^+ = 356$ ,  $[\text{M} - \text{H} + 2]^+ = 358$

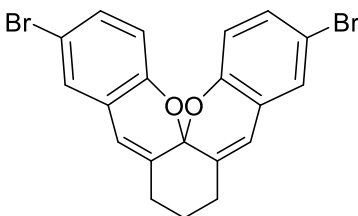

**CHX-5Br-SAL:** Pale yellow solid.  $^1\text{H-NMR}$  (400 MHz,  $\text{CDCl}_3$ )  $\delta$ , ppm = 7.40 (s, H-9), 7.30 (d, H-11,  $J=7.7$  Hz), 6.70 (d, H-12,  $J=7.7$  Hz), 6.60(s, H-7), 2.51 (t, H-3 and H-5), and 1.81 (quintet, H-5);  $^{13}\text{C-NMR}$  (100 MHz,  $\text{CDCl}_3$ )  $\delta$ , ppm = 149.2 (C13), 133.4 (C10), 128.9 (C2, C6), 126.3 (C11), 125.2 (C9), 123.1 (C8), 121.5 (C7), 118.4 (C12), 96.8 (C1), 26.4 (C3, C5), and 20.3 (C4); IR (KBr disc): 3059-w (aromatic C-H stretch); 2927-s (aliphatic C-H), 1633-m (C=C stretch); 1476 – s, 1419 -m (aromatic C-H bend), 1339-m (CH3 bend); 1286-m, 1228-m, 1179-m, 1126-m (C—O stretch); 1067-m, 1054-m (Ar-Br stretch); 852-s, 682-s (C-H oop). UV-vis ( $\text{CHCl}_3$ )  $\lambda_{\text{max}}$  nm: 242, 309; Mass:  $m/z$   $[\text{M}]^+ = 446.0$  and  $[\text{M}+2]^+ = 448.0$

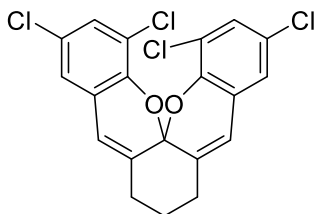

**CHX-DiCl-SAL:** Yellow solid.  $^1\text{H-NMR}$ (400 MHz,  $\text{CDCl}_3$ )  $\delta$ , ppm = 7.20 (d, H-11,  $J=2.8\text{Hz}$ ), 7.06 (d, H-9,  $J=2.8\text{Hz}$ ), 6.63 (s, H-7), 2.53 (4H, t, H-3 and H-5,  $J=6.5$  Hz), and 1.82 (2H, m, H-4,  $J=6.5$  Hz);  $^{13}\text{C-NMR}$  (100 MHz,  $\text{CDCl}_3$ )  $\delta$ , ppm = 144.0 (C13), 137.1 (C2, C6), 128.7 (C12), 126.8 (C10), 124.2 (C11), 123.3 (C9), 123.2 (C8), 122.4 (C7), 101.7 (C1), 33.4 (C3, C5), and 31.9 (C4); IR (KBr disc): 3040-w (alkene C-H stretch), 2920-m (aliphatic C-H stretch), 1610-s (C=C stretch), 1577-m, 1465-s (aromatic skeletal bands), 1440-s, 1373-s (aromatic C-H bend), 1320-s, 1275-s, 1110-s (C—O stretch), 910-s, 866-s, 770s (C-H oop bend); UV-vis ( $\text{CHCl}_3$ )  $\lambda_{\text{max}}$  nm: 240, 278; Mass:  $m/z$   $[\text{M} - \text{H}]^+ = 439$ ,  $[\text{M} - \text{H} + 2]^+ = 441$



# $^1\text{H}$ -NMR, $^{13}\text{C}$ -NMR and Mass spectra of the spirobenzopyrans

CHP-SAL

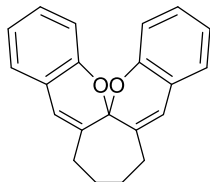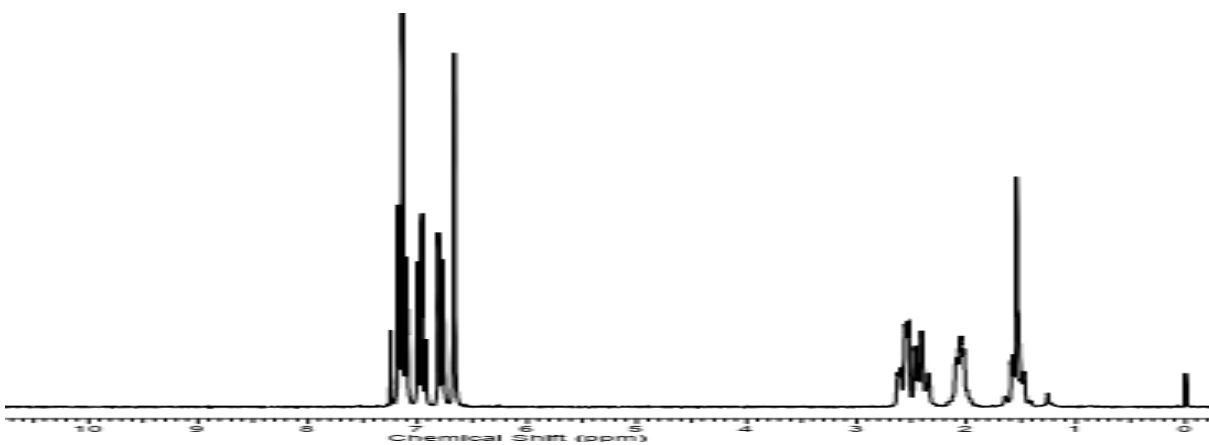

$^1\text{H}$  nmr spectrum

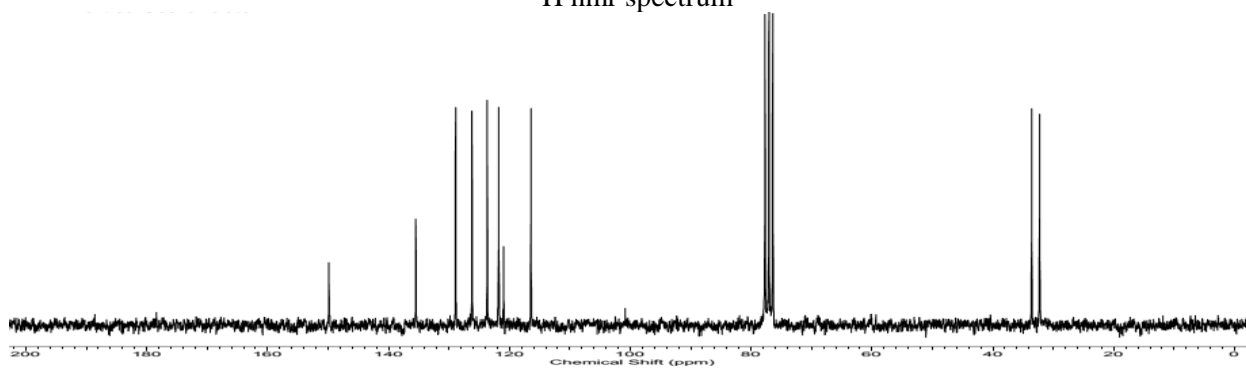

$^{13}\text{C}$  nmr spectrum

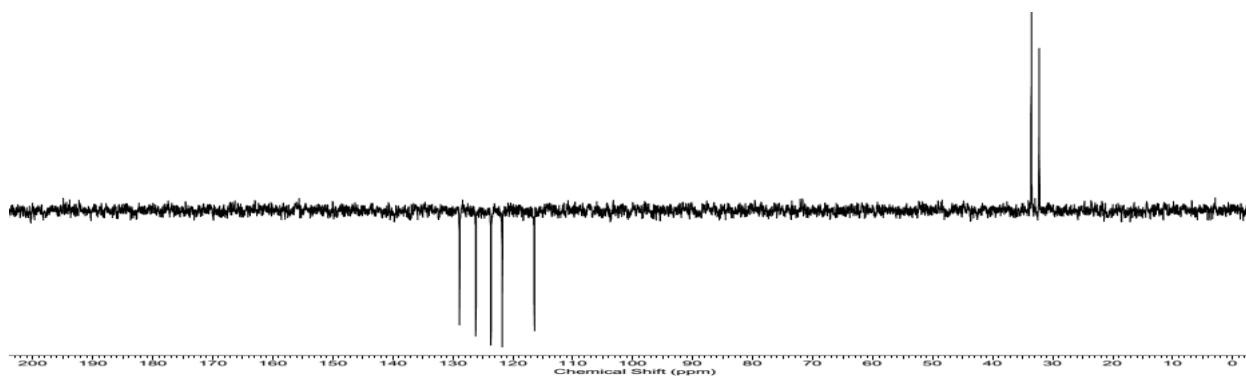

DEPT-135  $^{13}\text{C}$  nmr spectrum

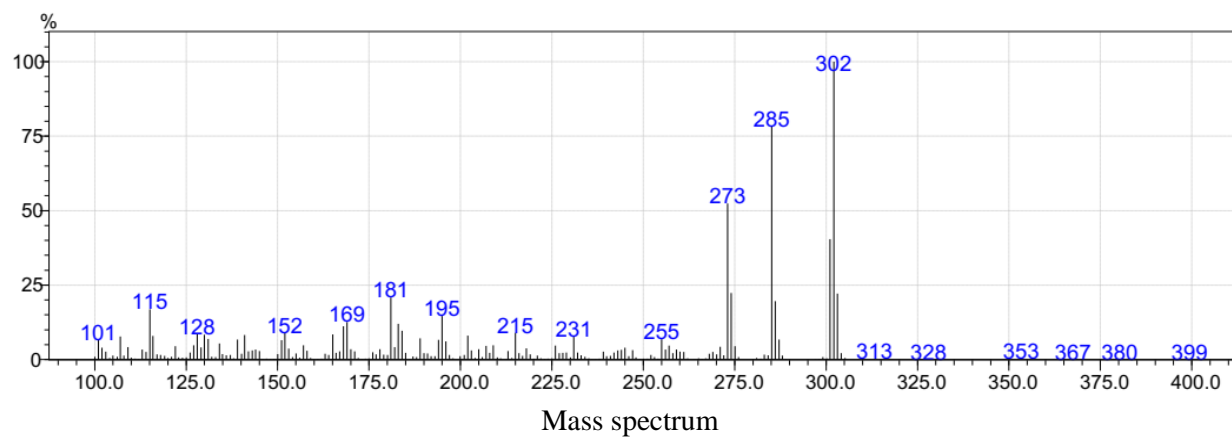

**CHP-4MO-SAL**

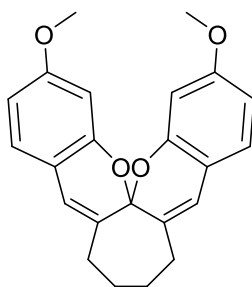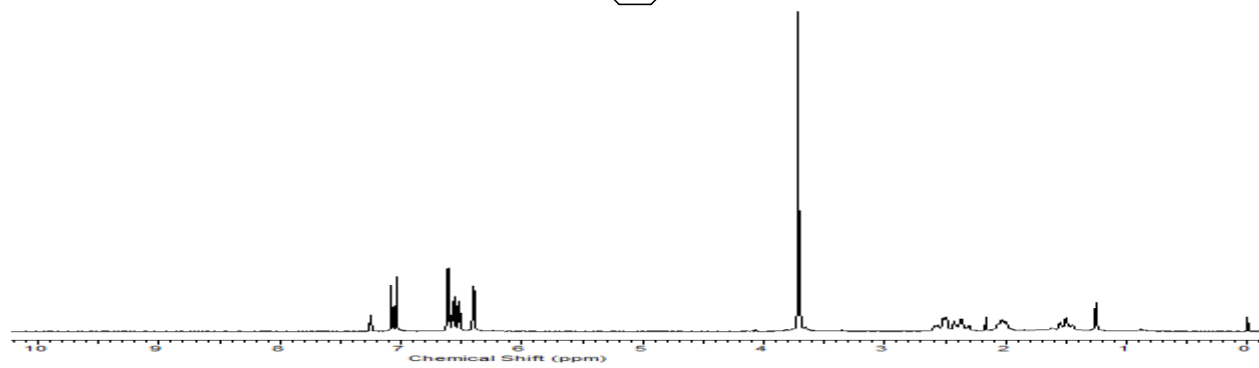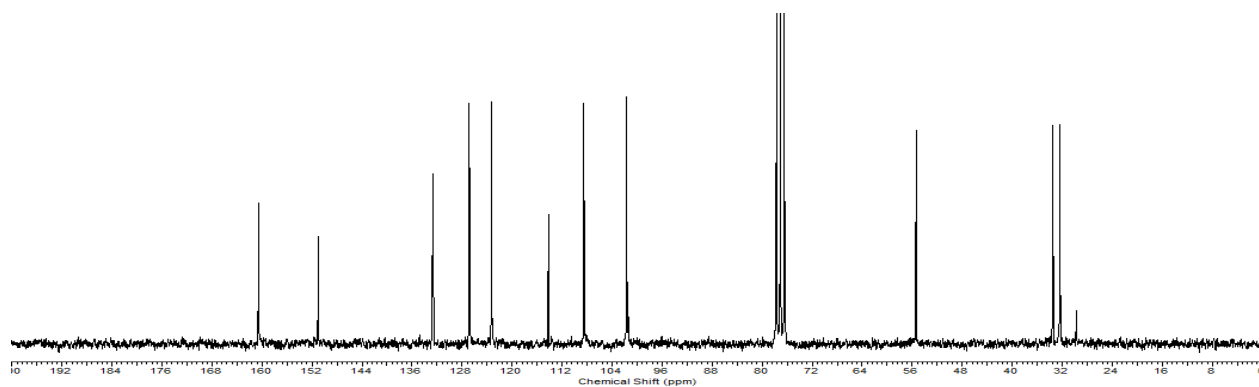

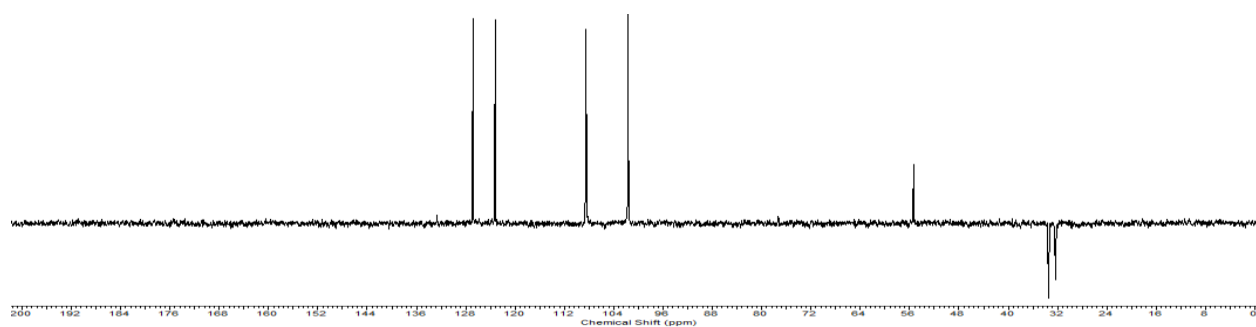

DEPT-135 <sup>13</sup>C nmr spectrum

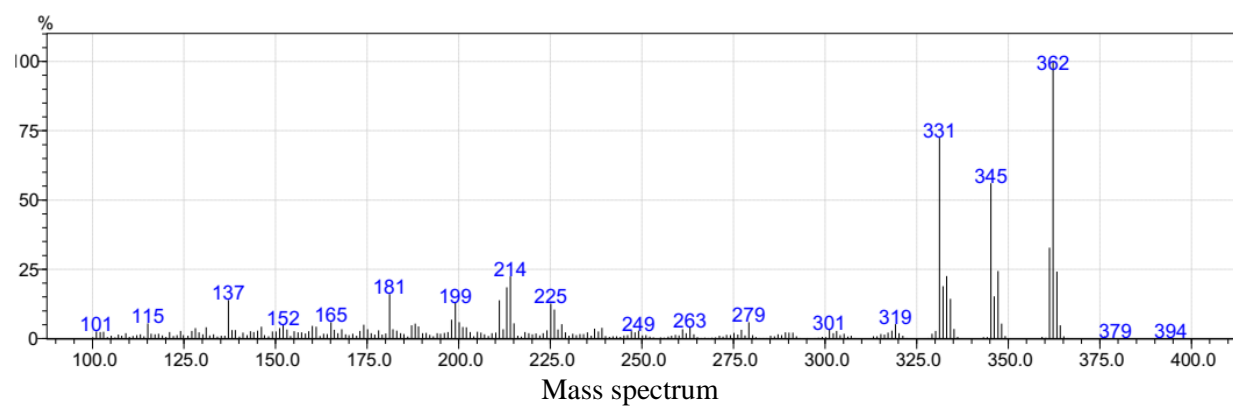

CHP-5MO-SAL

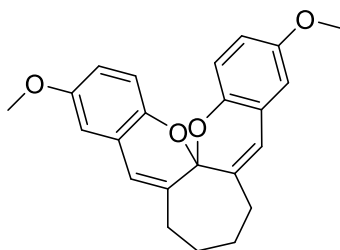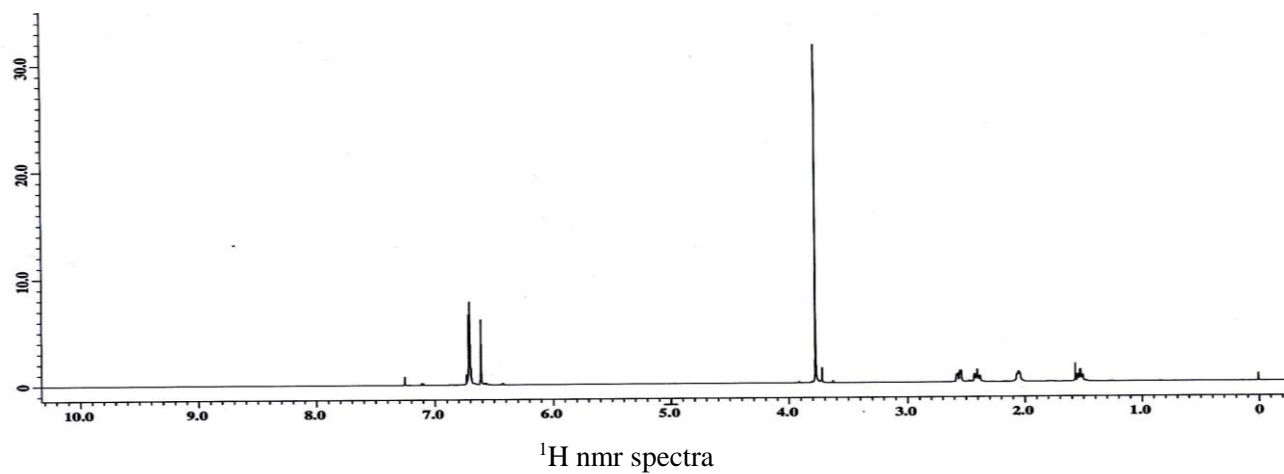

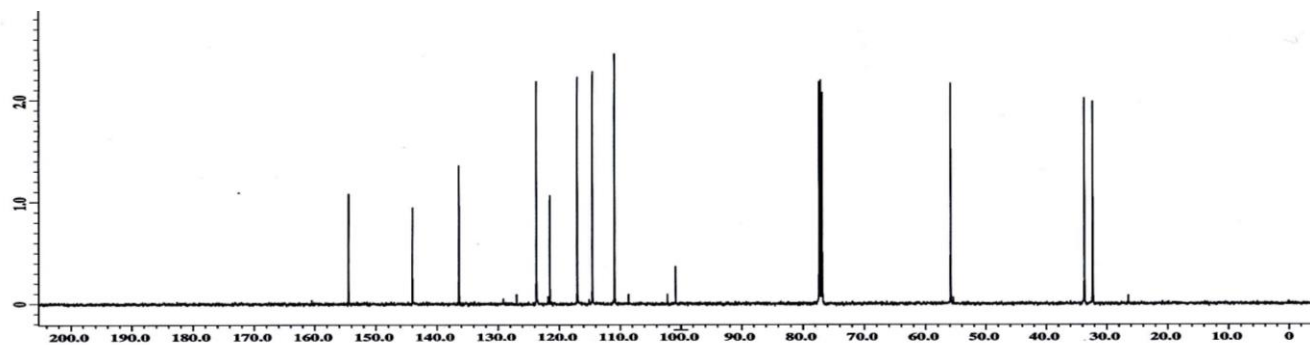

$^{13}\text{C}$  nmr spectra

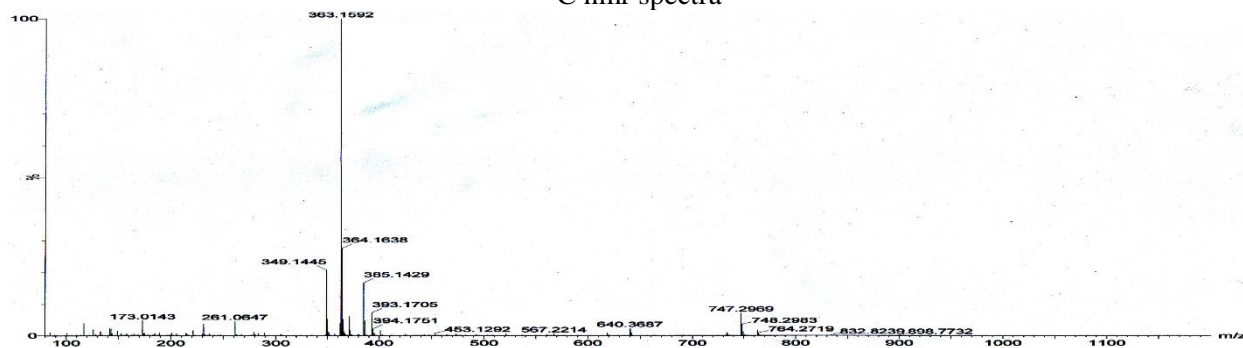

Mass spectrum

**CHP-5Cl-SAL**

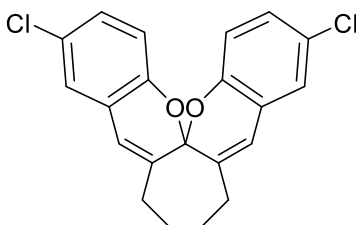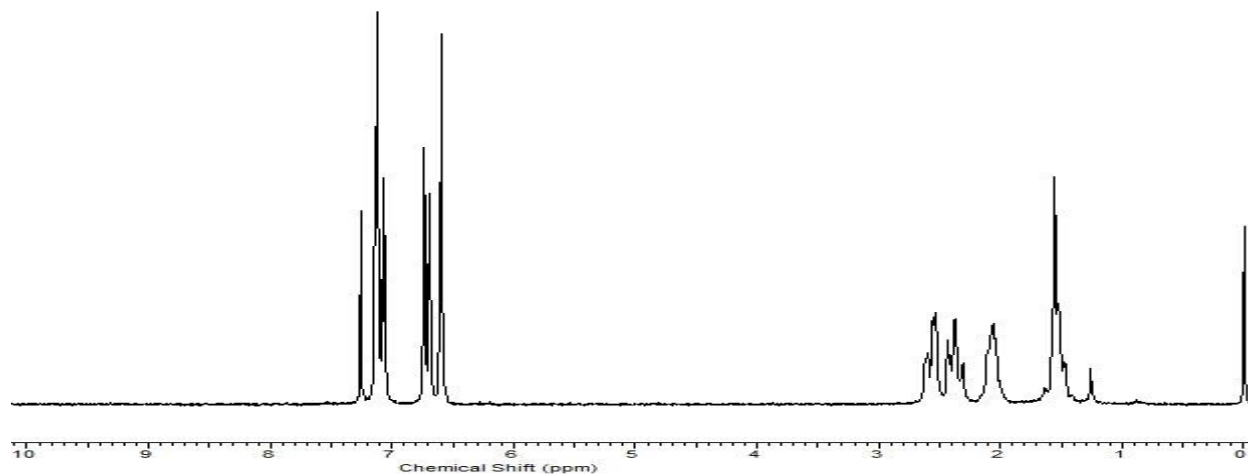

$^1\text{H}$  nmr spectrum

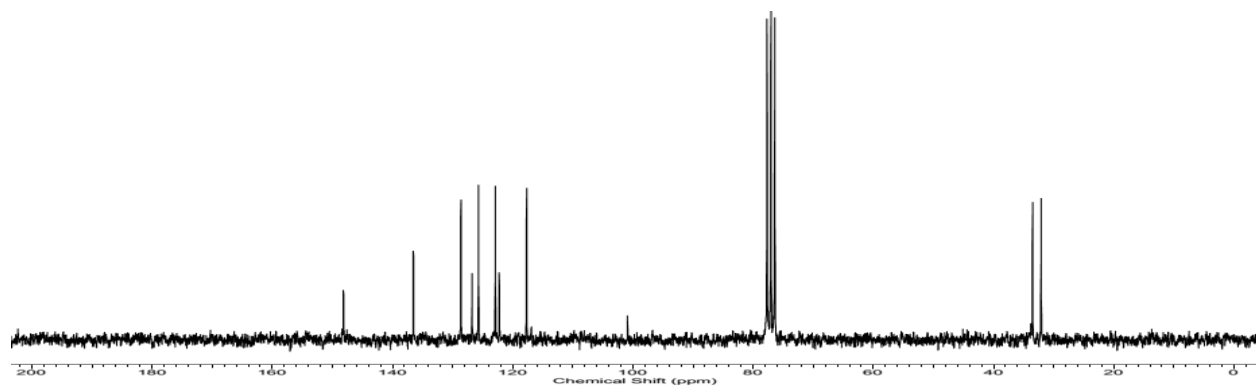

$^{13}\text{C}$  nmr spectrum

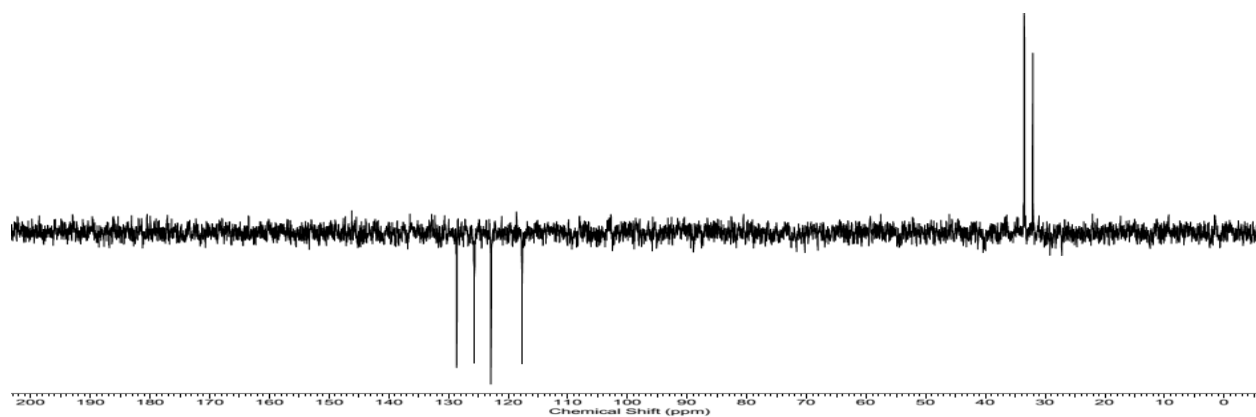

DEPT-135  $^{13}\text{C}$  nmr spectrum

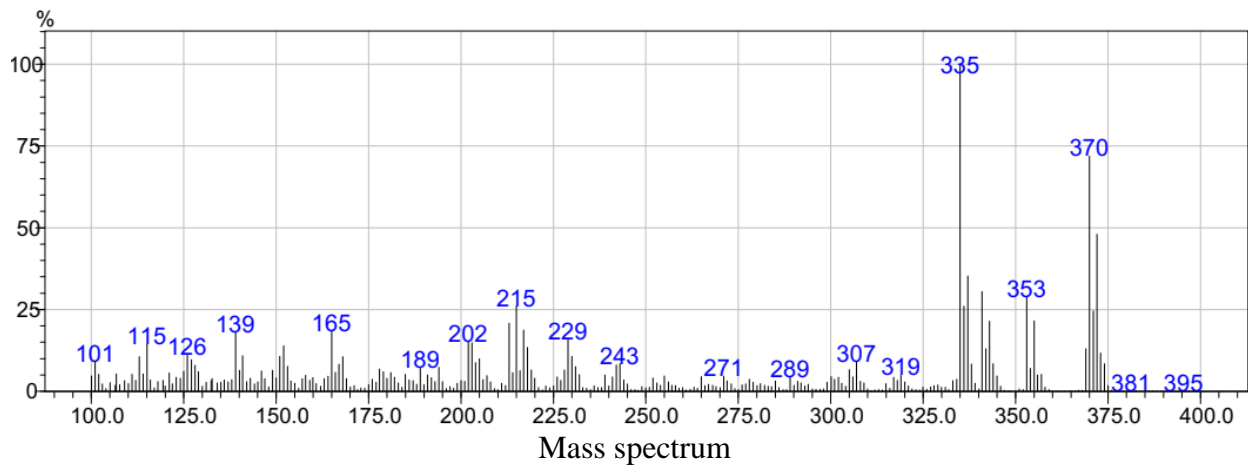

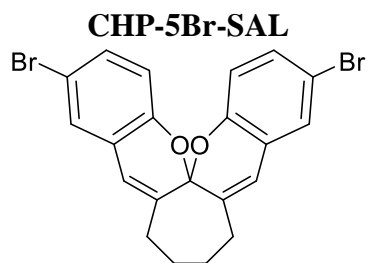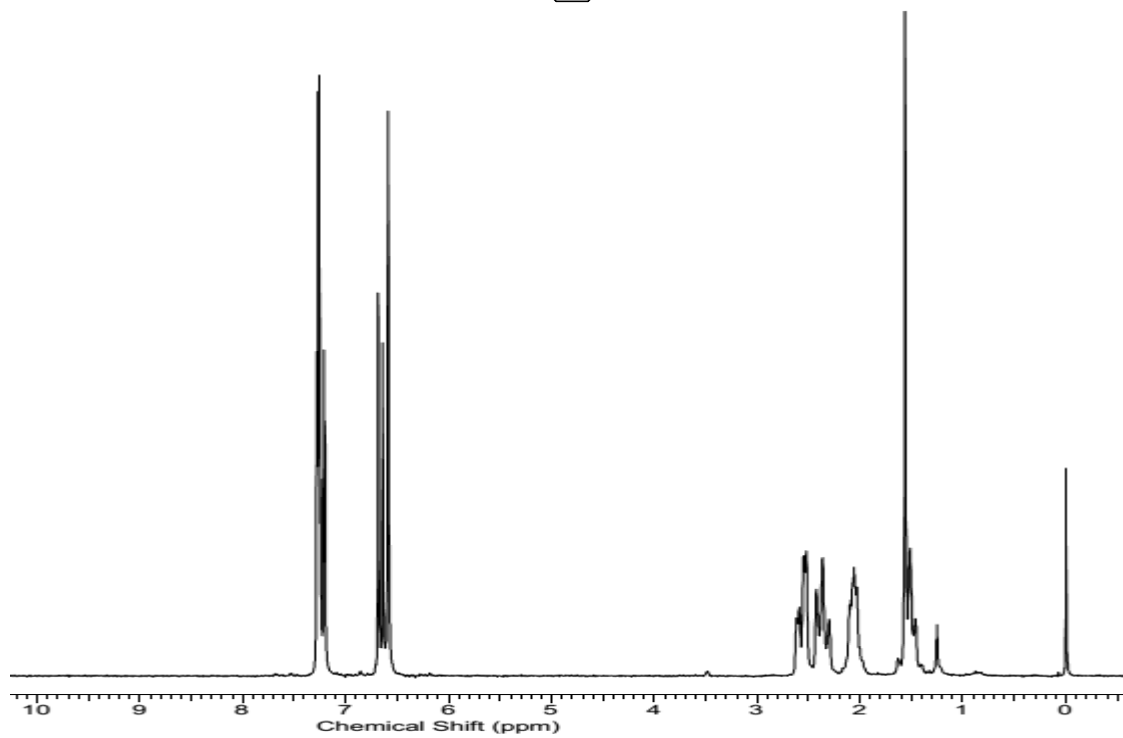

$^1\text{H}$  nmr spectra

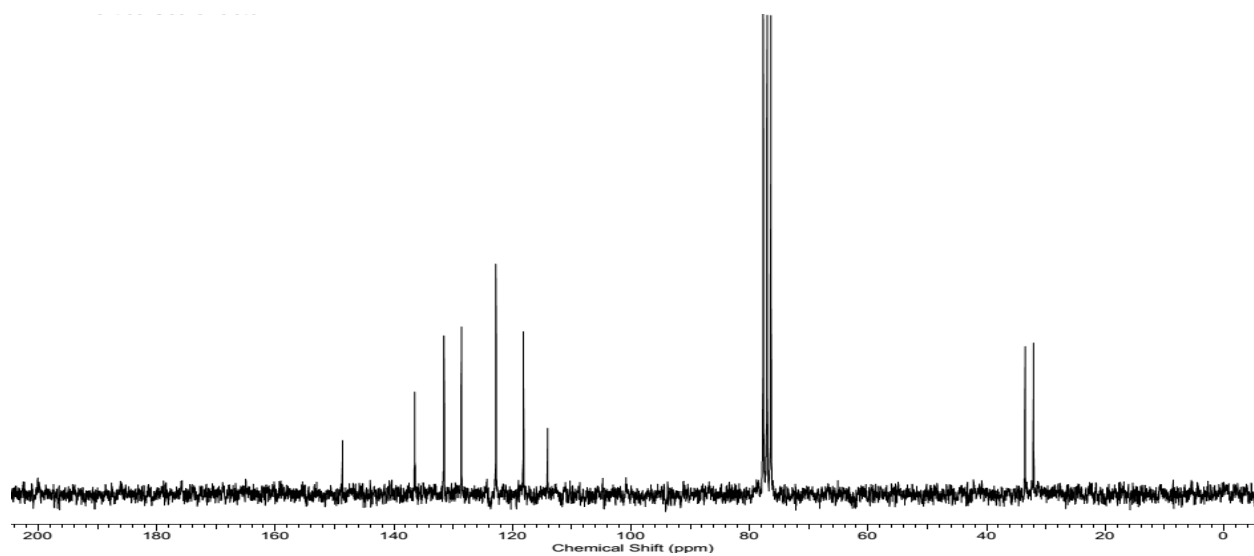

$^{13}\text{C}$  nmr spectra

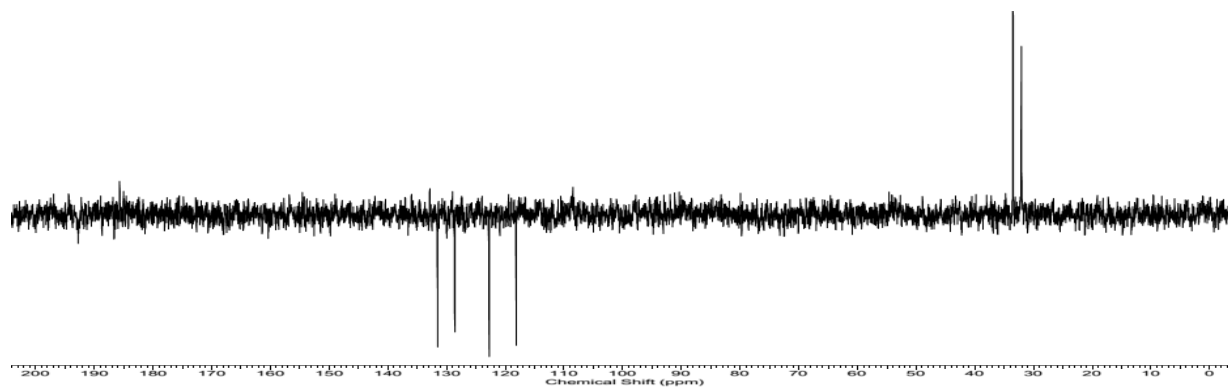

DEPT-135  $^{13}\text{C}$  nmr spectra

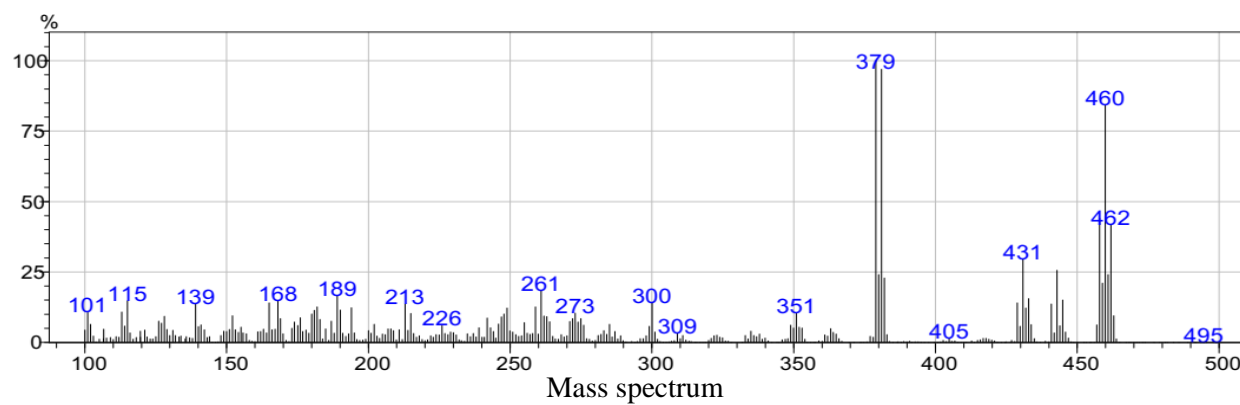

Mass spectrum

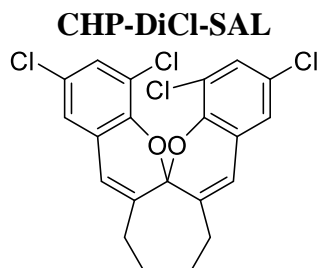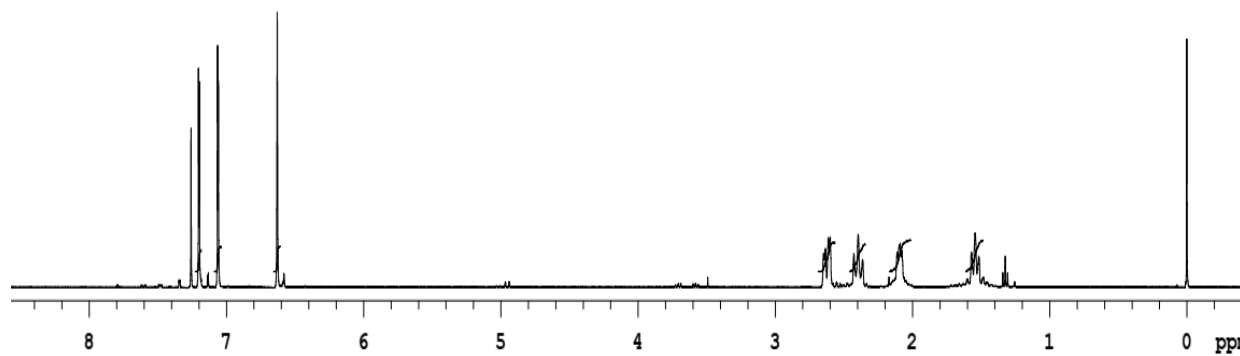

$^1\text{H}$  nmr spectrum

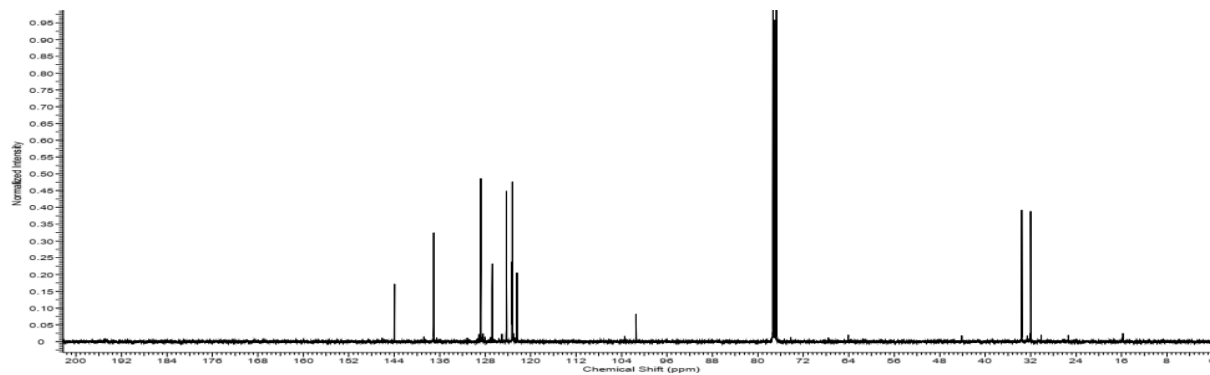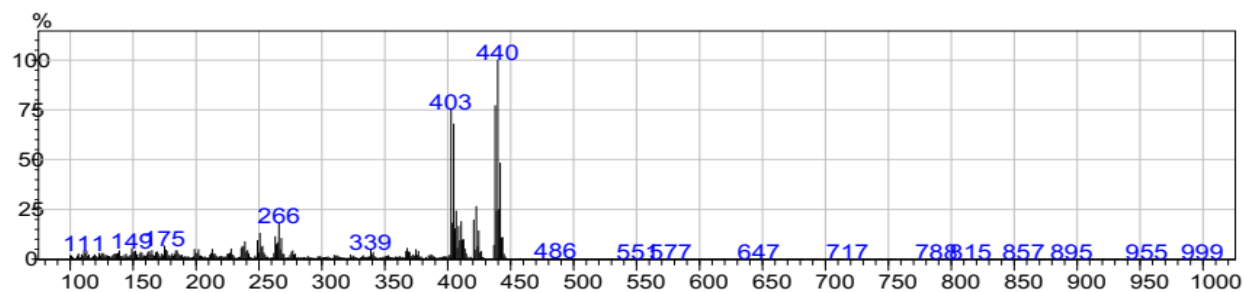

**CHX-SAL**

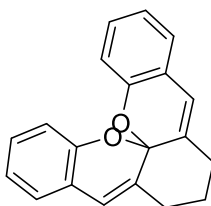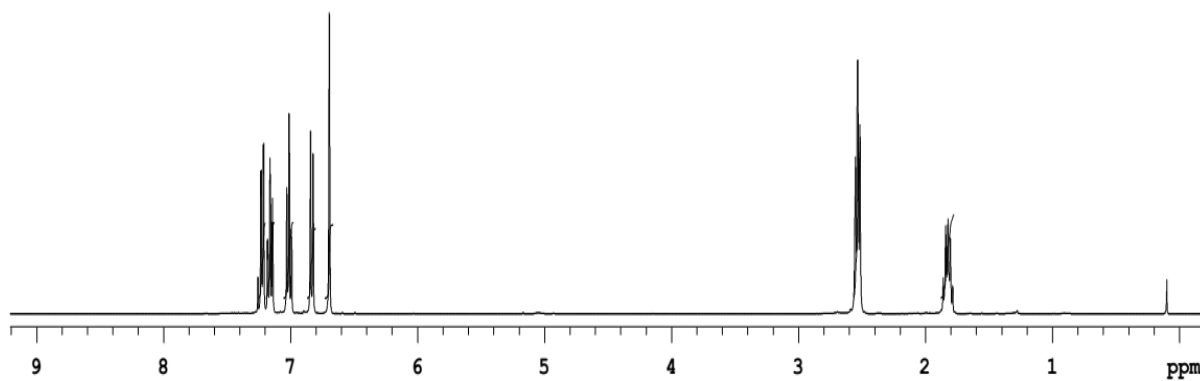



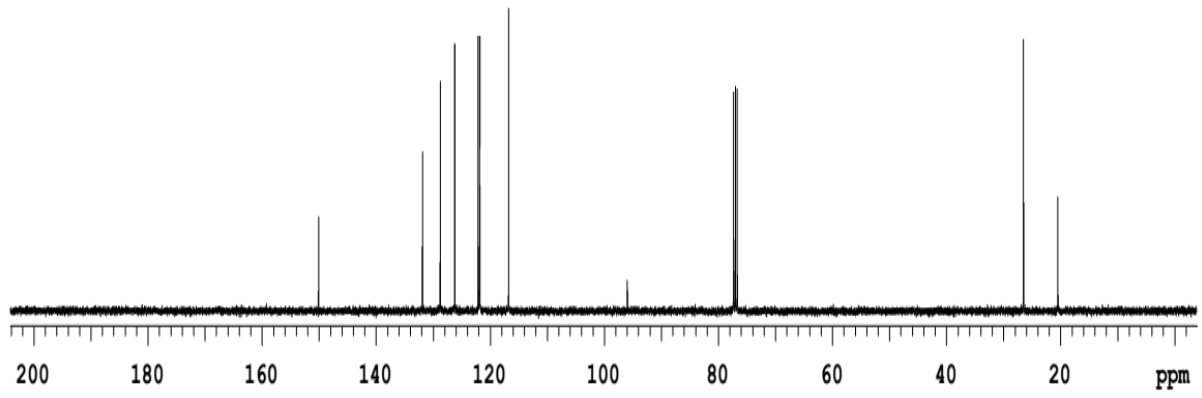

$^{13}\text{C}$  nmr spectrum

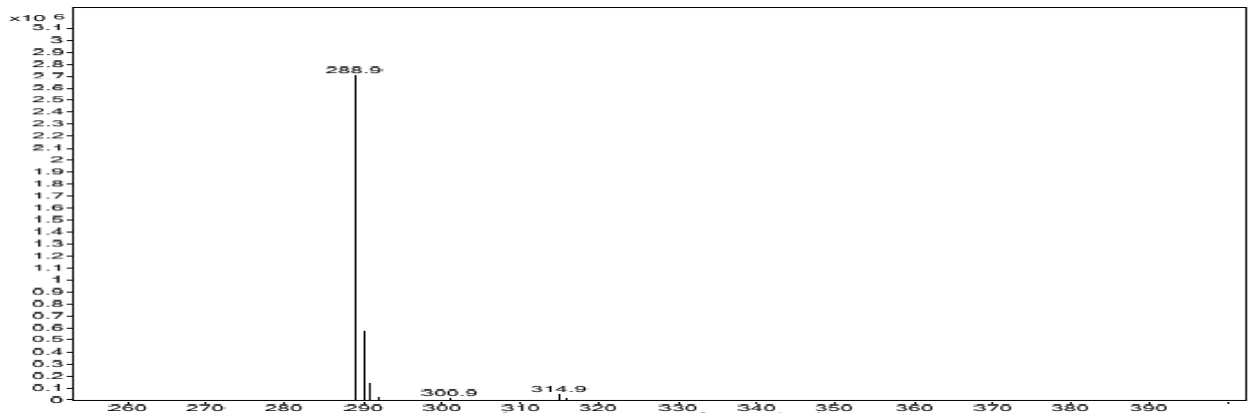

Mass spectrum

**CHX-4MO-SAL**

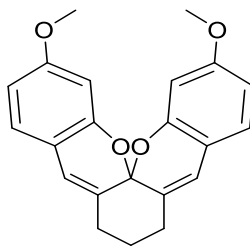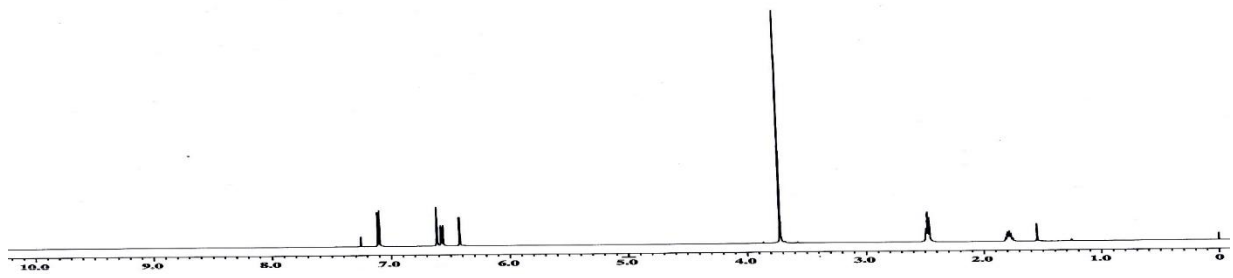

$^1\text{H}$  nmr spectrum

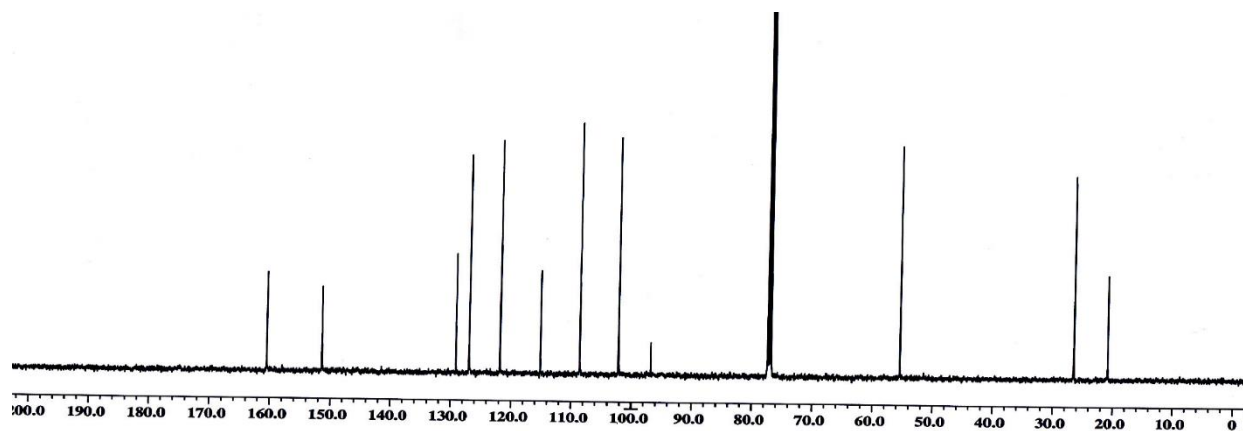

$^{13}\text{C}$  nmr spectrum

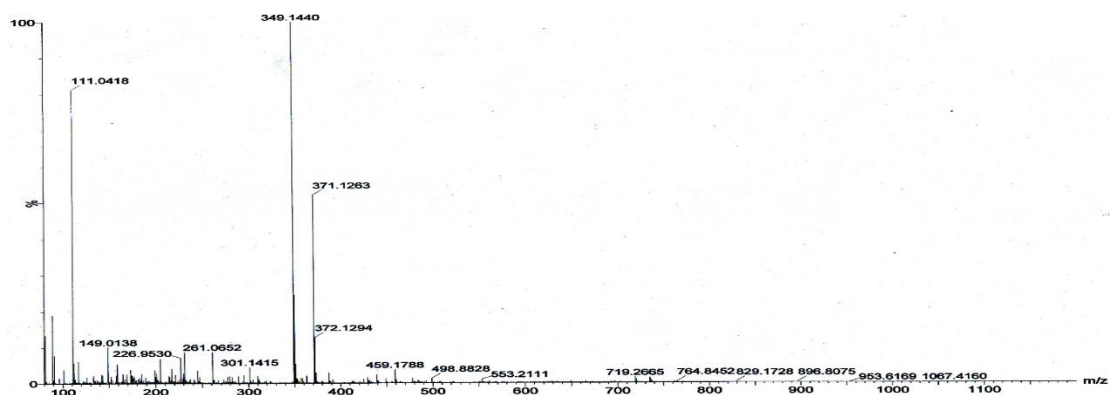

Mass spectra

**CHX-5MO-SAL**

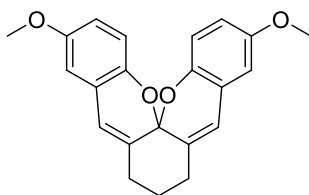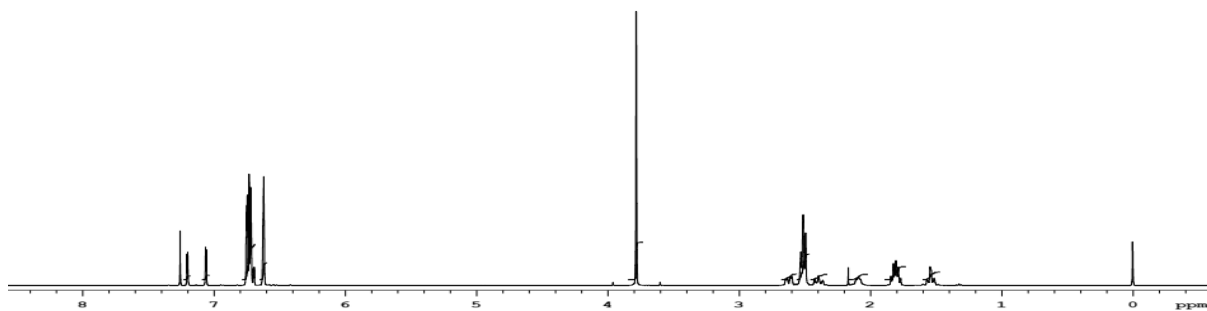

$^1\text{H}$  nmr spectrum

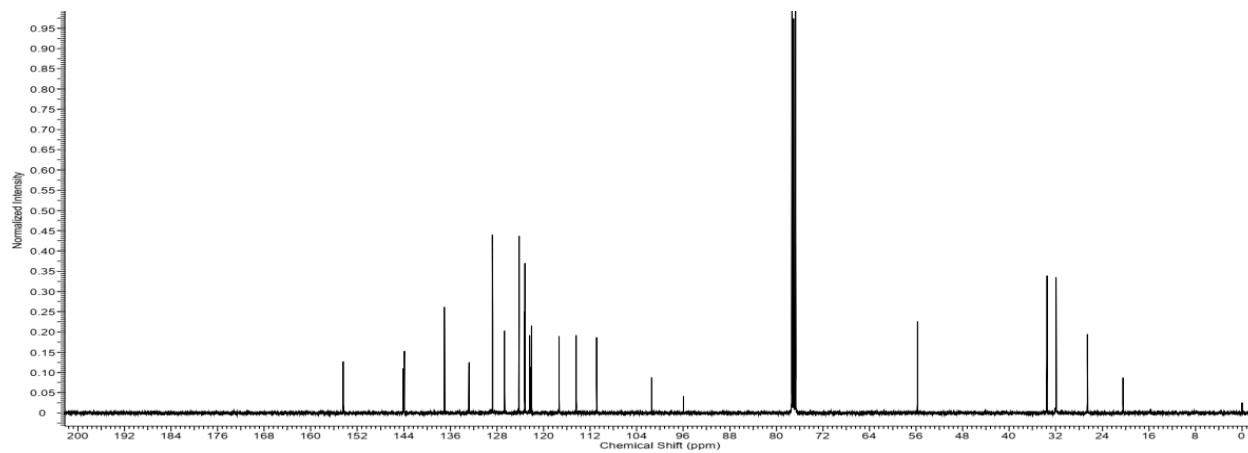

$^{13}\text{C}$  nmr spectrum

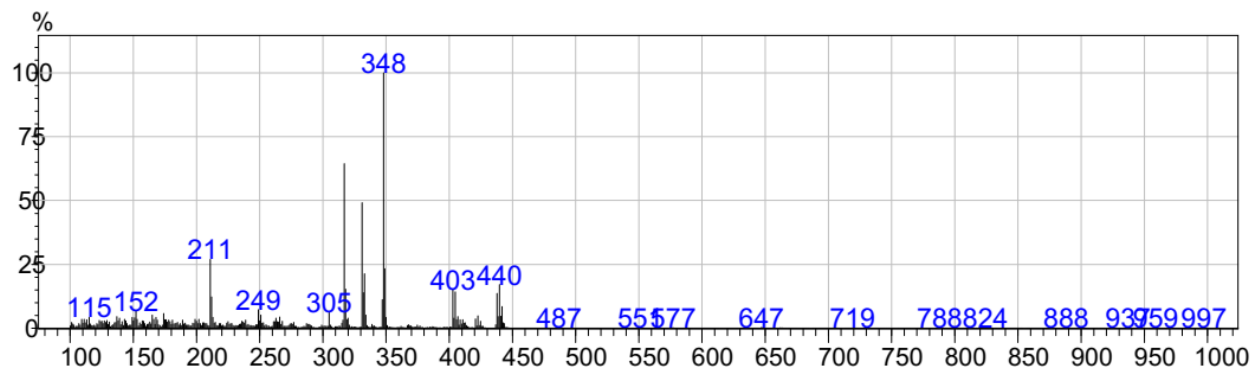

Mass spectrum

**CHX-5Cl-SAL**

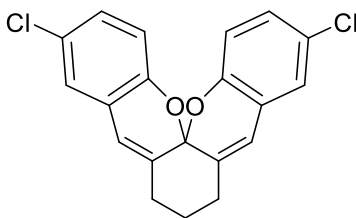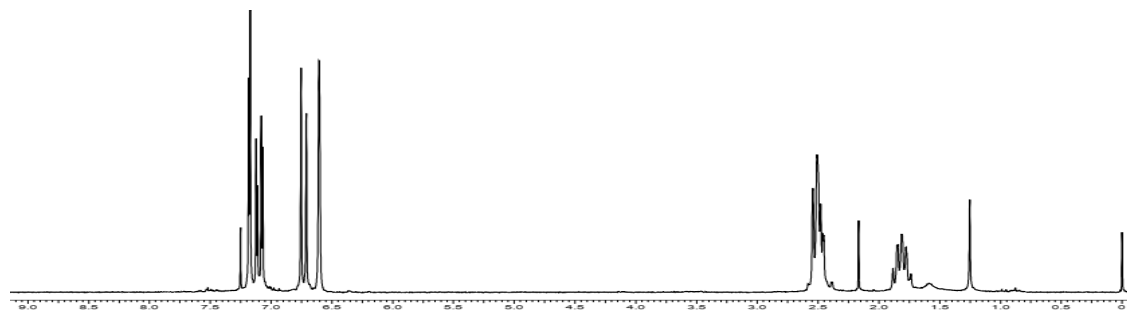

$^1\text{H}$  nmr spectrum

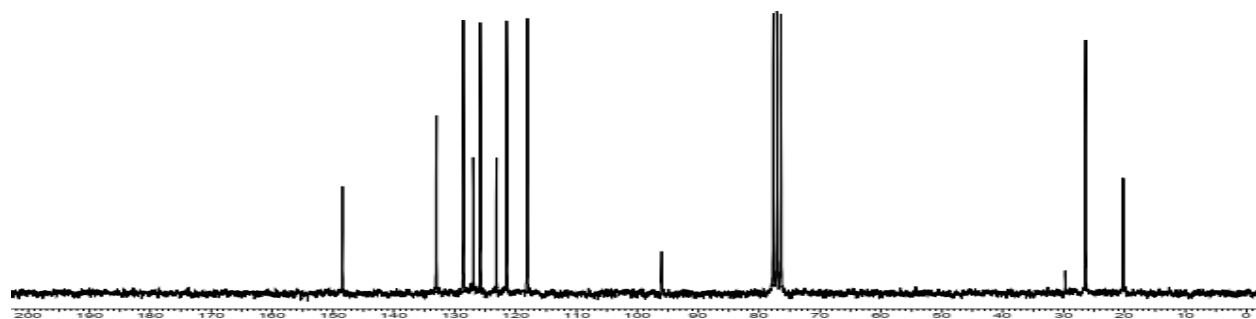

$^{13}\text{C}$  nmr spectrum

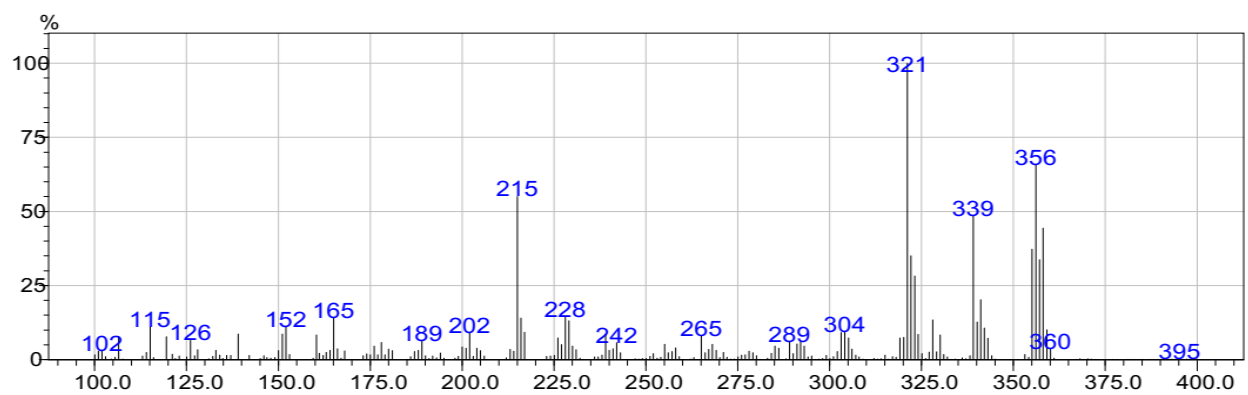

Mass spectrum

**CHX-5Br-SAL**

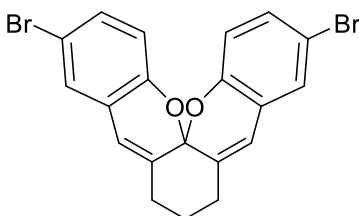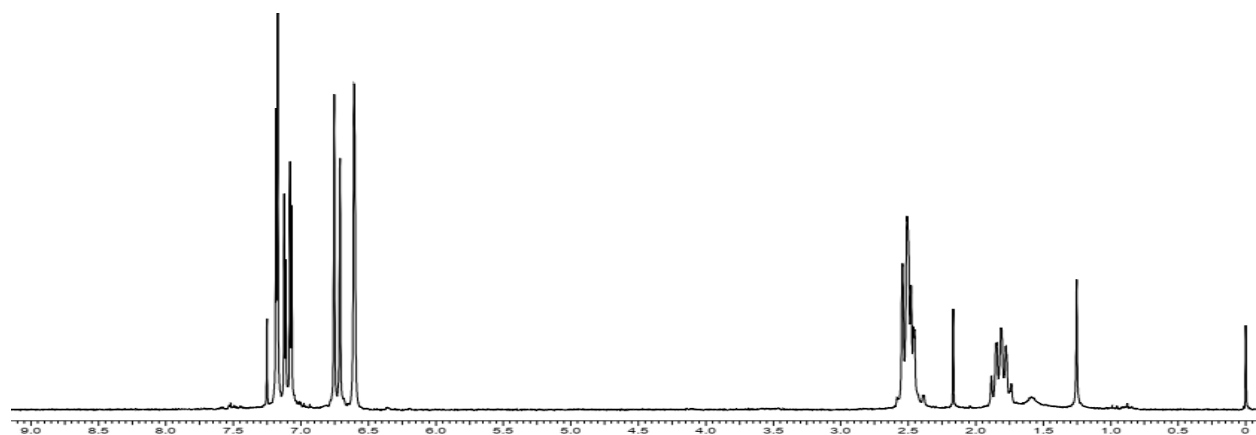

$^1\text{H}$  nmr spectrum

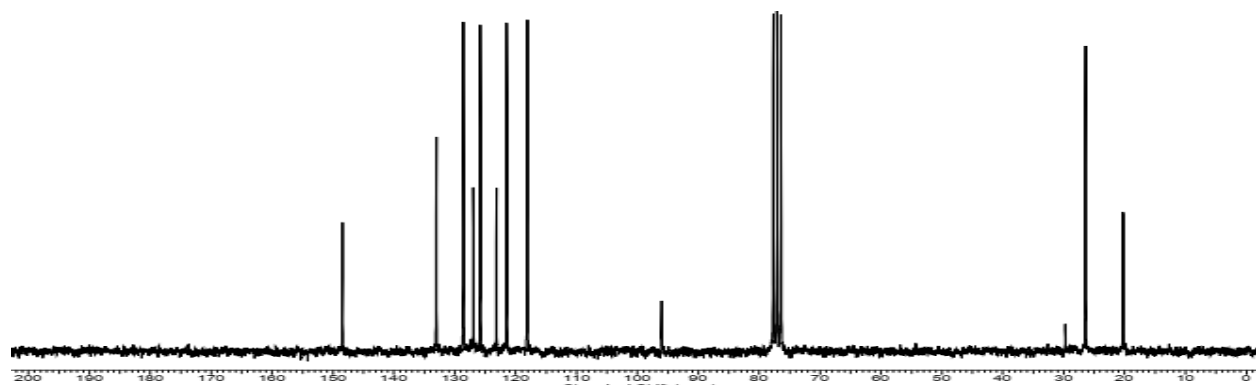

$^{13}\text{C}$  nmr spectrum

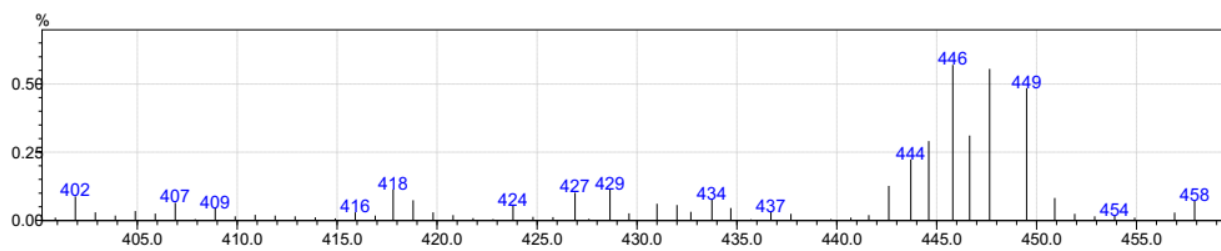

Mass spectrum

**CHX-DiCl-SAL**

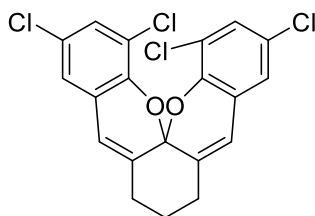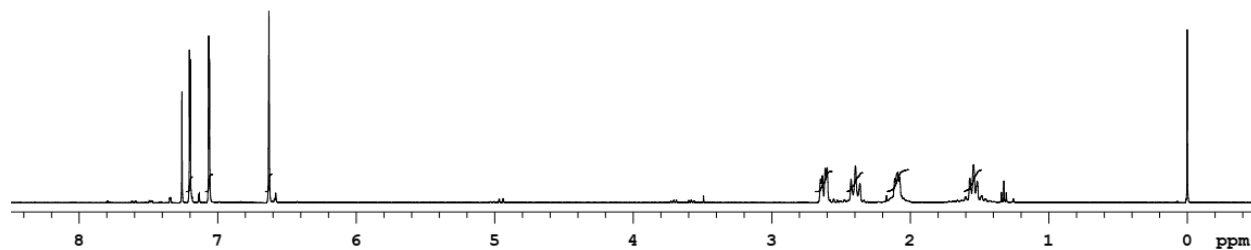

$^1\text{H}$  nmr spectrum

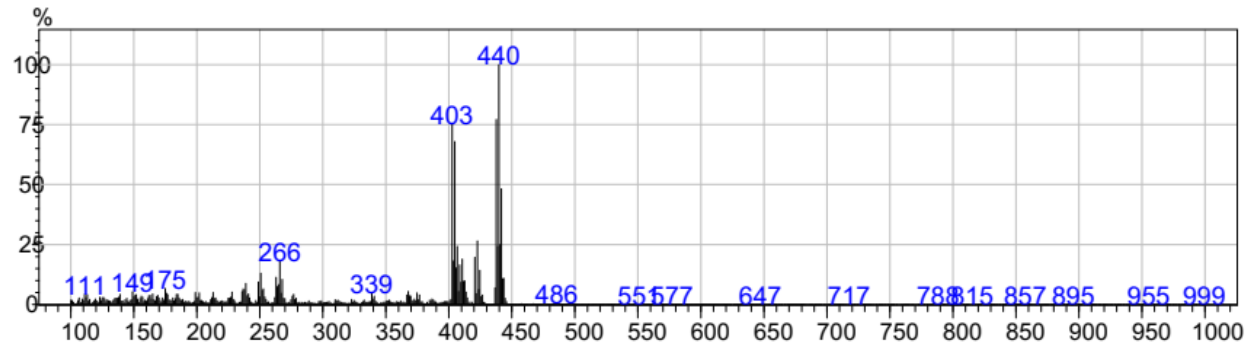

Mass Spectrum

# HPLC DATA

CHP-5Br-SAL, Signal at  $\lambda_{\max}$  nm = 308

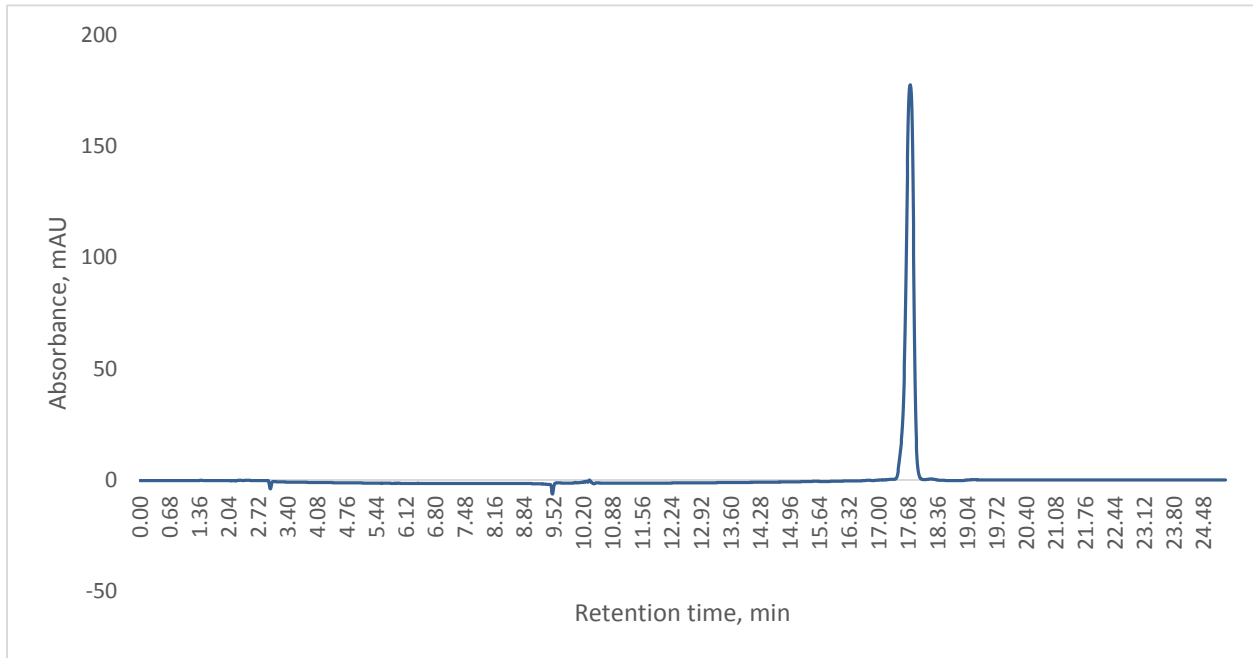

CHP-5MO-SAL, Signal at  $\lambda_{\max}$  nm = 321

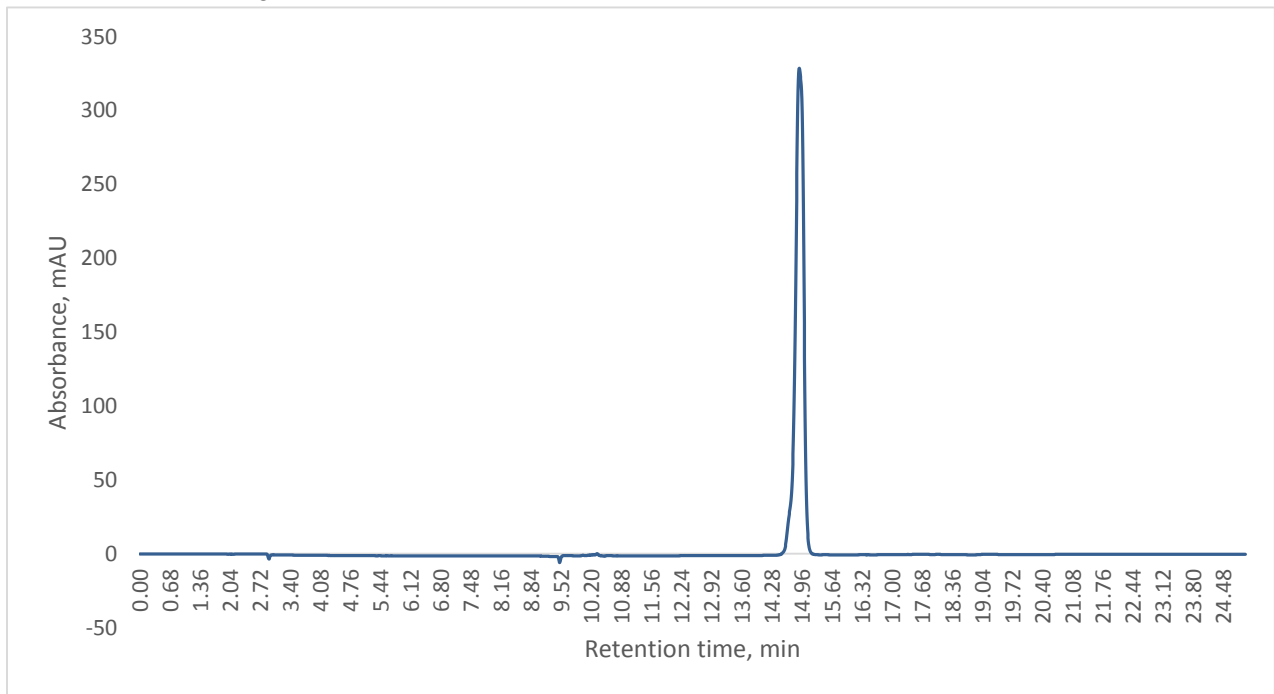

CHP-4MO-SAL, Signal at  $\lambda_{\max}$  nm = 278

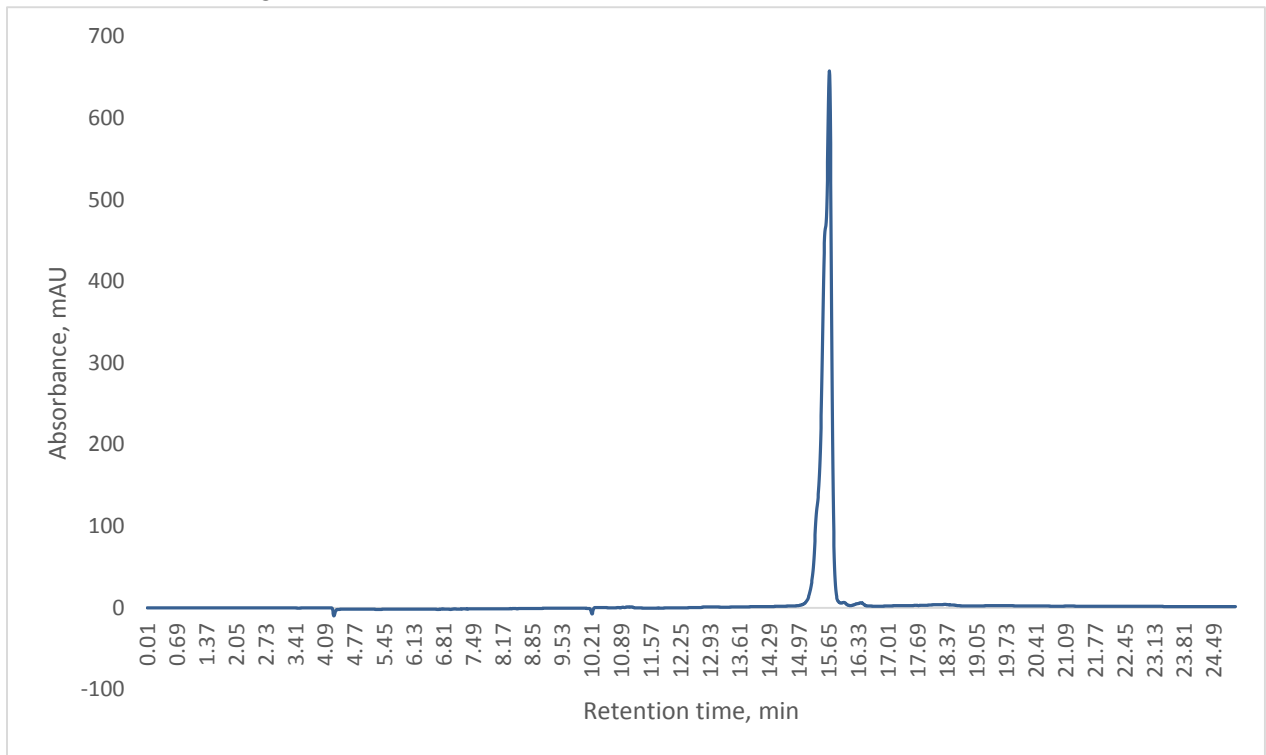

CHP-SAL, Signal at  $\lambda_{\max}$  nm = 298

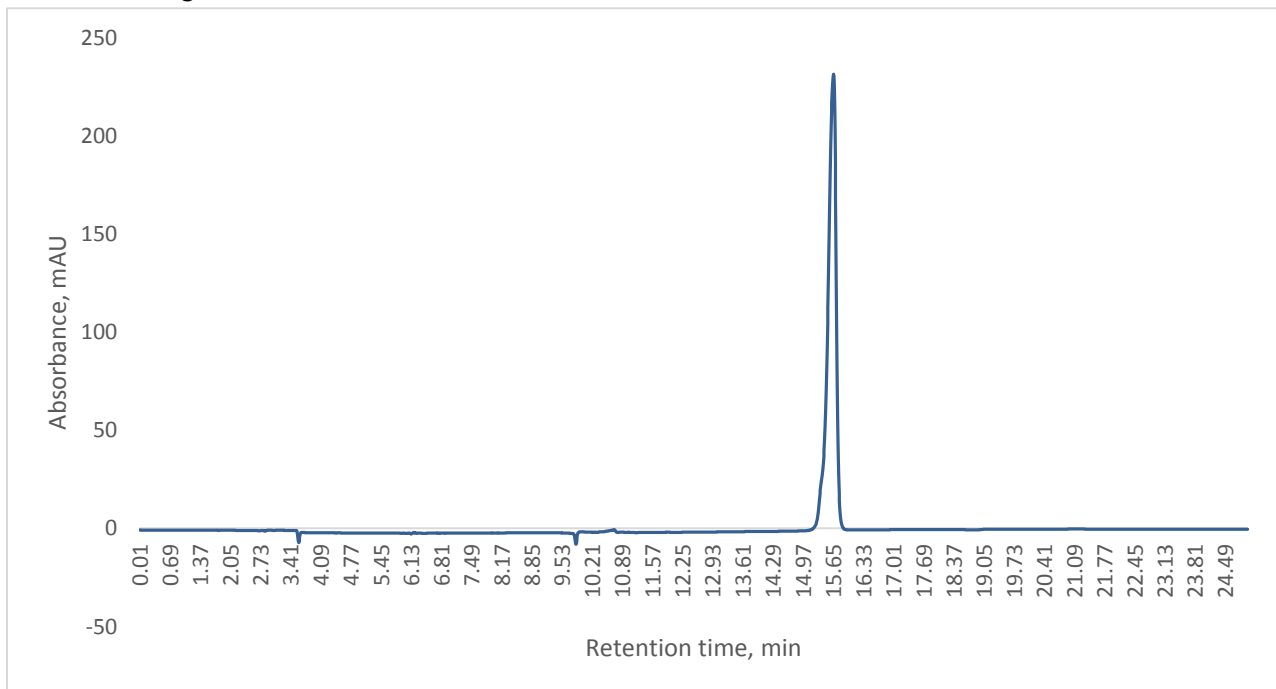



CHP-5Cl-SAL, Signal at  $\lambda_{\max}$  nm = 298

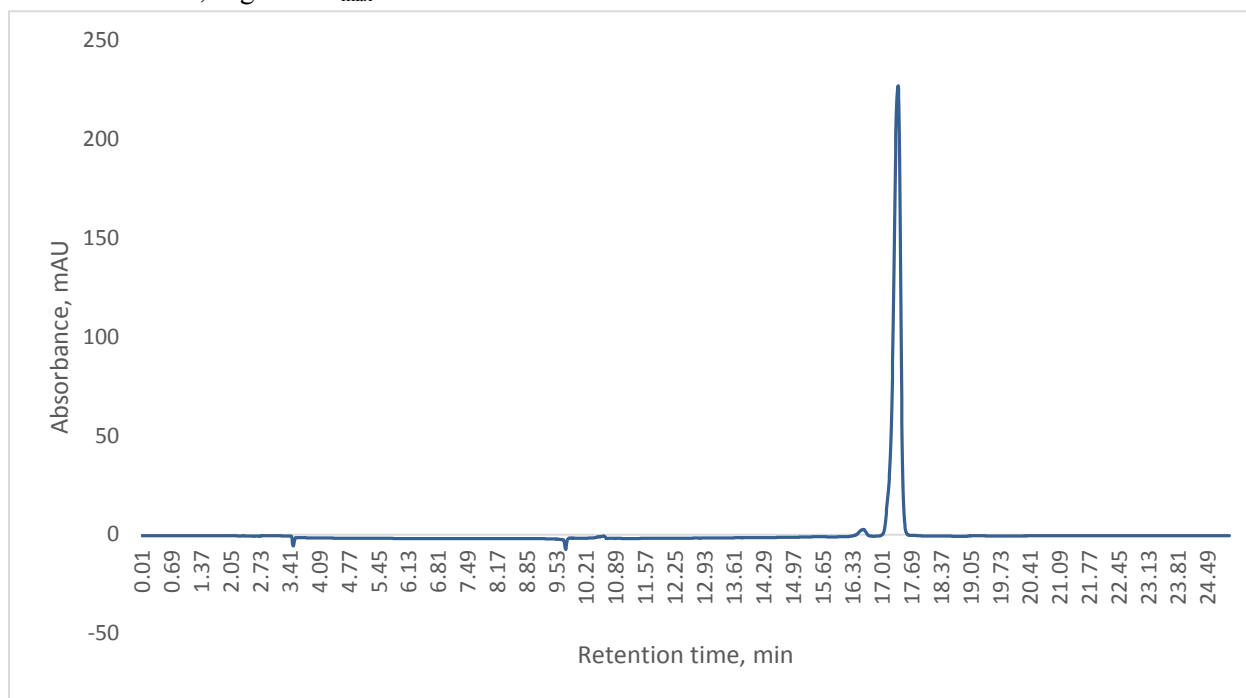

| Sample      | Retention time |
|-------------|----------------|
| CHP-SAL     | 15.65          |
| CHP-4MO-SAL | 15.67          |
| CHP-5MO-SAL | 14.91          |
| CHP-5Cl-SAL | 17.34          |
| CHP-5Br-SAL | 17.74          |

**SD Table II. Retention time of each spirobibenzopyran in minutes**

| Time (min) | Solvent A (%)<br>(Water) | Solvent B (%)<br>(ACN) |
|------------|--------------------------|------------------------|
| 0          | 100                      | 0                      |
| 15         | 5                        | 95                     |
| 17         | 100                      | 0                      |

**SD Table III: Mobile Phase program for Gradient Elution**

# XRD DATA

CHP-5Cl-SAL

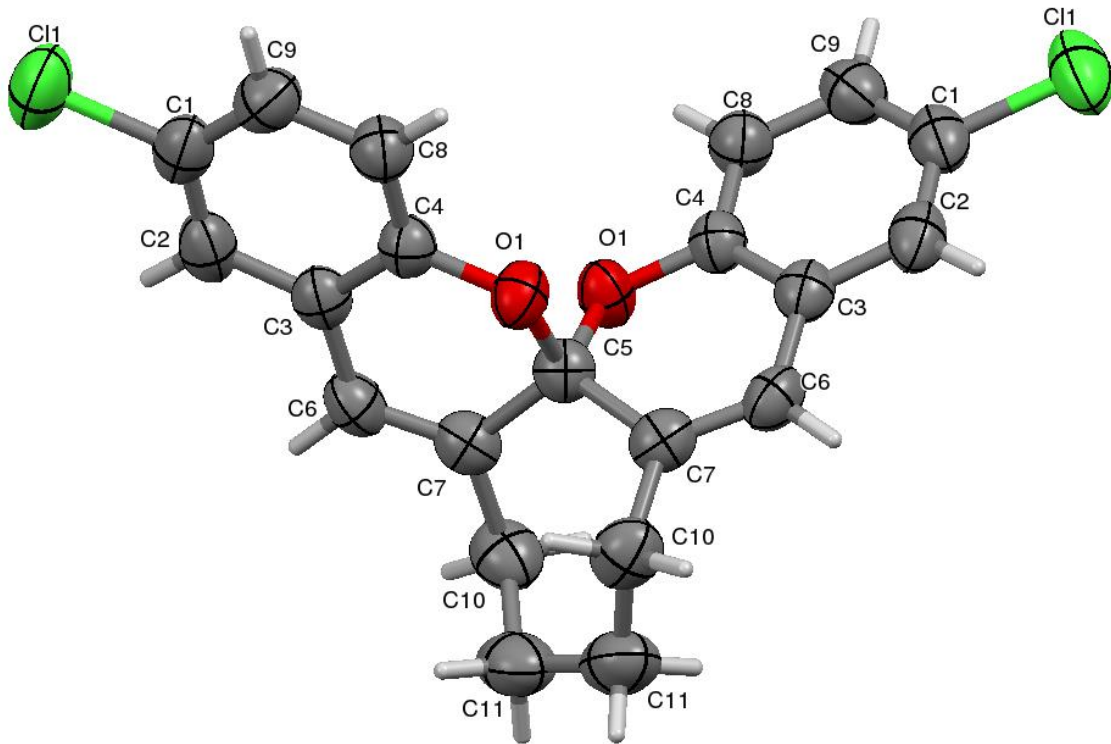

Table 1: Crystal data and structure refinement details.

|                                          |                                                    |                        |
|------------------------------------------|----------------------------------------------------|------------------------|
| CCDC Number                              | CCDC 1504427                                       |                        |
| Empirical formula                        | $C_{21}H_{16}Cl_2O_2$                              |                        |
| Formula weight                           | 185.62                                             |                        |
| Temperature                              | 296(2) K                                           |                        |
| Wavelength                               | 1.54178 Å                                          |                        |
| Refins. for cell determination           | 1150                                               |                        |
| $\theta$ range for above                 | 4.61° to 63.68°                                    |                        |
| Crystal system                           | Orthorhombic                                       |                        |
| Space group                              | <i>Pbcn</i>                                        |                        |
| Cell dimensions                          |                                                    |                        |
| $a = 11.1071(6)$ Å                       | $b = 8.2385(4)$ Å                                  | $c = 19.1755(9)$ Å     |
| $\alpha = 90.00^\circ$                   | $\beta = 90.00^\circ$                              | $\gamma = 90.00^\circ$ |
| Volume                                   | 1754.67(15) Å <sup>3</sup>                         |                        |
| <i>Z</i>                                 | 8                                                  |                        |
| Density(calculated)                      | 1.405 Mg m <sup>-3</sup>                           |                        |
| Absorption coefficient                   | 3.416 mm <sup>-1</sup>                             |                        |
| $F_{000}$                                | 768                                                |                        |
| Crystal size                             | 0.29 × 0.26 × 0.23 mm                              |                        |
| $\theta$ range for data collection       | 4.61° to 63.68°                                    |                        |
| Index ranges                             | -12 ≤ <i>h</i> ≤ 12                                |                        |
|                                          | -9 ≤ <i>k</i> ≤ 7                                  |                        |
|                                          | -21 ≤ <i>l</i> ≤ 22                                |                        |
| Reflections collected                    | 7530                                               |                        |
| Independent reflections                  | 1423 [ <i>R</i> <sub>int</sub> = 0.0561]           |                        |
| Absorption correction                    | multi-scan                                         |                        |
| Refinement method                        | Full matrix least-squares on <i>F</i> <sup>2</sup> |                        |
| Data / restraints / parameters           | 1423 / 0 / 115                                     |                        |
| Goodness-of-fit on <i>F</i> <sup>2</sup> | 1.121                                              |                        |
| Final [ <i>I</i> > 2σ( <i>I</i> )]       | <i>R</i> 1 = 0.0729, <i>wR</i> 2 = 0.1888          |                        |
| <i>R</i> indices (all data)              | <i>R</i> 1 = 0.0820, <i>wR</i> 2 = 0.2022          |                        |
| Extinction coefficient                   | 0.0132(19)                                         |                        |
| Largest diff. peak and hole              | 0.440 and -0.481 e Å <sup>-3</sup>                 |                        |

Table 2: Bond lengths (Å).

| Atoms  | Length   | Atoms   | Length   |
|--------|----------|---------|----------|
| C11-C1 | 1.746(3) | C5-O1   | 1.440(3) |
| O1-C4  | 1.374(3) | C5-C7   | 1.505(3) |
| O1-C5  | 1.440(3) | C5-C7   | 1.505(3) |
| C1-C9  | 1.360(5) | C6-C7   | 1.327(4) |
| C1-C2  | 1.372(5) | C7-C10  | 1.509(4) |
| C2-C3  | 1.397(4) | C8-C9   | 1.388(4) |
| C3-C4  | 1.390(4) | C10-C11 | 1.529(5) |
| C3-C6  | 1.448(4) | C11-C11 | 1.510(7) |
| C4-C8  | 1.377(4) |         |          |

Table 3: Bond angles ( $^{\circ}$ ).

| Atoms     | Angle      | Atoms       | Angle      |
|-----------|------------|-------------|------------|
| C4-O1-C5  | 118.88(16) | O1-C5-C7    | 103.38(13) |
| C9-C1-C2  | 121.8(3)   | O1-C5-C7    | 103.38(13) |
| C9-C1-C11 | 119.2(3)   | O1-C5-C7    | 113.19(13) |
| C2-C1-C11 | 119.0(3)   | C7-C5-C7    | 116.2(3)   |
| C1-C2-C3  | 119.7(3)   | C7-C6-C3    | 122.0(3)   |
| C4-C3-C2  | 118.0(3)   | C6-C7-C5    | 119.2(2)   |
| C4-C3-C6  | 117.5(2)   | C6-C7-C10   | 123.8(3)   |
| C2-C3-C6  | 124.4(3)   | C5-C7-C10   | 116.9(2)   |
| O1-C4-C8  | 117.1(2)   | C4-C8-C9    | 119.2(3)   |
| O1-C4-C3  | 121.2(2)   | C1-C9-C8    | 119.6(3)   |
| C8-C4-C3  | 121.6(2)   | C7-C10-C11  | 113.1(3)   |
| O1-C5-O1  | 107.5(3)   | C11-C11-C10 | 115.2(2)   |
| O1-C5-C7  | 113.19(13) |             |            |

CHP-5MO-SAL

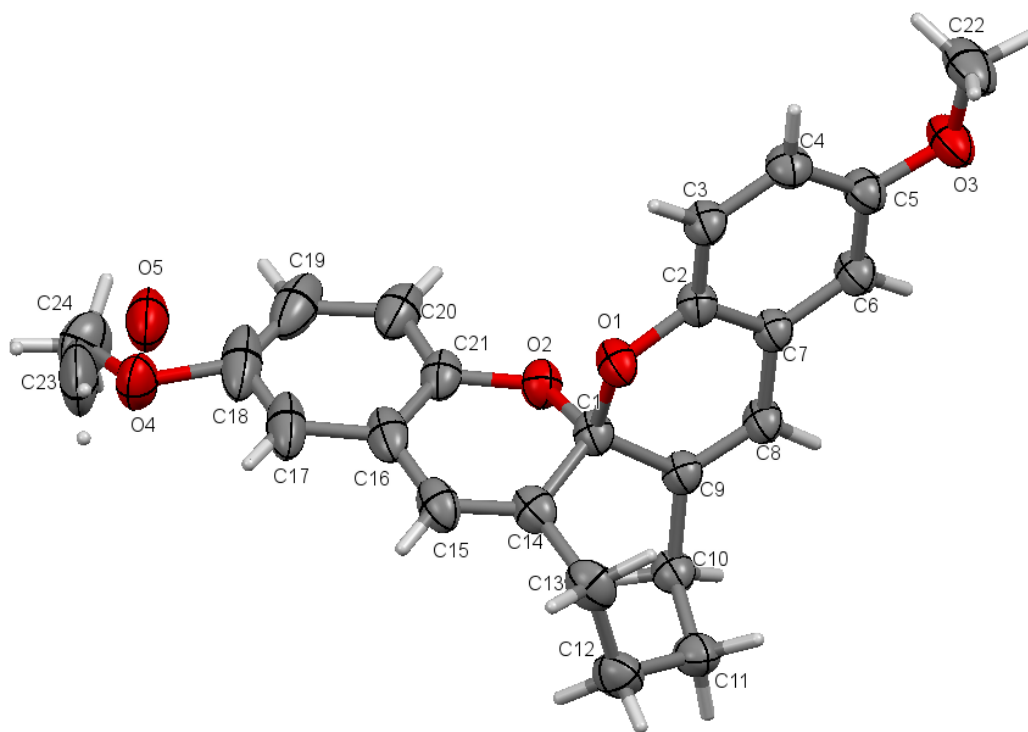

Table 1: Crystal data and structure refinement details.

|                                    |                                                                    |                        |  |
|------------------------------------|--------------------------------------------------------------------|------------------------|--|
| CCDC Number                        | CCDC 1504532                                                       |                        |  |
| Empirical formula                  | $C_{23}H_{22}O_4$                                                  |                        |  |
| Formula weight                     | 362.41                                                             |                        |  |
| Temperature                        | 296(2) K                                                           |                        |  |
| Wavelength                         | 1.54178 Å                                                          |                        |  |
| Refins. for cell determination     | 1926                                                               |                        |  |
| $\theta$ range for above           | 5.76° to 64.30°                                                    |                        |  |
| Crystal system                     | Monoclinic                                                         |                        |  |
| Space group                        | $Cc$                                                               |                        |  |
| Cell dimensions                    |                                                                    |                        |  |
| $a = 8.029(2)$ Å                   | $b = 21.258(5)$ Å                                                  | $c = 11.349(3)$ Å      |  |
| $\alpha = 90.00^\circ$             | $\beta = 101.660(19)^\circ$                                        | $\gamma = 90.00^\circ$ |  |
| Volume                             | 1897.0(9) Å <sup>3</sup>                                           |                        |  |
| $Z$                                | 4                                                                  |                        |  |
| Density(calculated)                | 1.269 Mg m <sup>-3</sup>                                           |                        |  |
| Absorption coefficient             | 0.695 mm <sup>-1</sup>                                             |                        |  |
| $F_{000}$                          | 768                                                                |                        |  |
| Crystal size                       | 0.29 × 0.28 × 0.26 mm                                              |                        |  |
| $\theta$ range for data collection | 5.76° to 64.30°                                                    |                        |  |
| Index ranges                       | $-9 \leq h \leq 7$<br>$-22 \leq k \leq 24$<br>$-13 \leq l \leq 13$ |                        |  |
| Reflections collected              | 6231                                                               |                        |  |
| Independent reflections            | 2376 [ $R_{\text{int}} = 0.0453$ ]                                 |                        |  |
| Absorption correction              | multi-scan                                                         |                        |  |
| Refinement method                  | Full matrix least-squares on $F^2$                                 |                        |  |
| Data / restraints / parameters     | 2376 / 8 / 266                                                     |                        |  |
| Goodness-of-fit on $F^2$           | 1.049                                                              |                        |  |
| Final [ $I > 2\sigma(I)$ ]         | $R1 = 0.0588$ , $wR2 = 0.1552$                                     |                        |  |
| $R$ indices (all data)             | $R1 = 0.0712$ , $wR2 = 0.1659$                                     |                        |  |
| Largest diff. peak and hole        | 0.204 and $-0.208 e \text{ \AA}^{-3}$                              |                        |  |

Table 2: Bond lengths (Å).

| Atoms   | Length   | Atoms   | Length    |
|---------|----------|---------|-----------|
| O2-C21  | 1.380(4) | C21-C16 | 1.408(7)  |
| O2-C1   | 1.436(4) | C14-C15 | 1.319(6)  |
| O1-C2   | 1.376(4) | C14-C13 | 1.507(6)  |
| O1-C1   | 1.433(4) | C3-C4   | 1.390(5)  |
| O3-C5   | 1.371(4) | C11-C12 | 1.518(6)  |
| O3-C22  | 1.383(5) | C11-C10 | 1.525(6)  |
| C8-C9   | 1.314(4) | C20-C19 | 1.413(8)  |
| C8-C7   | 1.446(5) | C15-C16 | 1.439(7)  |
| C7-C6   | 1.382(5) | C16-C17 | 1.396(6)  |
| C7-C2   | 1.395(4) | C12-C13 | 1.541(6)  |
| C5-C6   | 1.380(5) | C17-C18 | 1.368(11) |
| C5-C4   | 1.386(5) | C18-C19 | 1.393(12) |
| C2-C3   | 1.374(5) | C18-O5  | 1.459(13) |
| C9-C1   | 1.504(5) | C18-O4  | 1.482(12) |
| C9-C10  | 1.512(5) | O4-C23  | 1.42(2)   |
| C1-C14  | 1.518(5) | O5-C24  | 1.29(4)   |
| C21-C20 | 1.381(7) |         |           |

Table 3: Bond angles (°).

| Atoms      | Angle    | Atoms       | Angle     |
|------------|----------|-------------|-----------|
| C21-O2-C1  | 120.0(3) | C20-C21-C16 | 123.3(4)  |
| C2-O1-C1   | 119.4(2) | C15-C14-C13 | 123.7(4)  |
| C5-O3-C22  | 118.3(3) | C15-C14-C1  | 119.7(4)  |
| C9-C8-C7   | 122.4(3) | C13-C14-C1  | 116.6(3)  |
| C6-C7-C2   | 119.1(3) | C2-C3-C4    | 119.7(3)  |
| C6-C7-C8   | 123.6(3) | C5-C4-C3    | 120.4(3)  |
| C2-C7-C8   | 117.1(3) | C12-C11-C10 | 114.5(3)  |
| O3-C5-C6   | 115.7(3) | C21-C20-C19 | 116.9(6)  |
| O3-C5-C4   | 125.1(3) | C9-C10-C11  | 112.4(3)  |
| C6-C5-C4   | 119.2(3) | C14-C15-C16 | 121.6(4)  |
| C5-C6-C7   | 121.0(3) | C17-C16-C21 | 117.6(5)  |
| C3-C2-O1   | 118.1(2) | C17-C16-C15 | 123.2(5)  |
| C3-C2-C7   | 120.4(3) | C21-C16-C15 | 119.2(3)  |
| O1-C2-C7   | 121.2(3) | C11-C12-C13 | 114.1(3)  |
| C8-C9-C1   | 119.6(3) | C14-C13-C12 | 113.2(3)  |
| C8-C9-C10  | 123.1(3) | C18-C17-C16 | 120.7(7)  |
| C1-C9-C10  | 117.3(3) | C17-C18-C19 | 120.9(5)  |
| O1-C1-O2   | 108.0(3) | C17-C18-O5  | 142.5(10) |
| O1-C1-C9   | 113.1(3) | C19-C18-O5  | 96.2(10)  |
| O2-C1-C9   | 103.7(2) | C17-C18-O4  | 101.6(8)  |
| O1-C1-C14  | 104.1(2) | C19-C18-O4  | 137.5(8)  |
| O2-C1-C14  | 114.1(3) | O5-C18-O4   | 42.0(5)   |
| C9-C1-C14  | 114.1(3) | C18-C19-C20 | 120.6(7)  |
| O2-C21-C20 | 116.4(4) | C23-O4-C18  | 105.7(13) |
| O2-C21-C16 | 120.1(4) | C24-O5-C18  | 109(2)    |



#### 4. *In-vitro* anti-cancer activity protocol

The human tumor cell lines of the cancer screening panel were grown in RPMI 1640 medium containing 5% fetal bovine serum and 2 mM L-glutamine. For a typical screening experiment, cells were inoculated into 96 well microtiter plates in 100  $\mu$ L at plating densities ranging from 5,000 to 40,000 cells/well depending on the doubling time of individual cell lines. After cell inoculation, the microtiter plates were incubated at 37° C, 5 % CO<sub>2</sub>, 95 % air and 100 % relative humidity for 24 h prior to addition of experimental drugs. After 24 h, two plates of each cell line were fixed *in situ* with TCA, to represent a measurement of the cell population for each cell line at the time of drug addition (Tz). Experimental drugs were solubilized in dimethyl sulfoxide at 400-fold the desired final maximum test concentration and stored frozen prior to use. At the time of drug addition, an aliquot of frozen concentrate was thawed and diluted to twice the desired final maximum test concentration with complete medium containing 50  $\mu$ g/ml gentamicin. Additional four, 10-fold or ½ log serial dilutions were made to provide a total of five drug concentrations plus control. Aliquots of 100  $\mu$ l of these different drug dilutions were added to the appropriate microtiter wells already containing 100  $\mu$ l of medium, resulting in the required final drug concentrations. Following drug addition, the plates were incubated for an additional 48 h at 37°C, 5 % CO<sub>2</sub>, 95 % air, and 100 % relative humidity. For adherent cells, the assay was terminated by the addition of cold TCA. Cells were fixed *in situ* by the gentle addition of 50  $\mu$ l of cold 50 % (w/v) TCA (final concentration, 10 % TCA) and incubated for 60 minutes at 4°C. The supernatant was discarded, and the plates were washed five times with tap water and air dried. Sulforhodamine B (SRB) solution (100  $\mu$ l) at 0.4 % (w/v) in 1 % acetic acid was added to each well, and plates were incubated for 10 minutes at room temperature. After staining, unbound dye was removed by washing five times with 1 % acetic acid and the plates were air dried. Bound stain was subsequently solubilized with 10 mM trizma base, and the absorbance was read on an automated plate reader at a wavelength of 515 nm. For suspension cells, the methodology was the same except that the assay was terminated by fixing settled cells at the bottom of the wells by gently adding 50  $\mu$ l of 80 % TCA (final concentration, 16 % TCA). Using the seven absorbance measurements [time zero, (Tz), control growth, (C), and test growth in the presence of drug at the five concentration levels (Ti)], the percentage growth was calculated at each of the drug concentrations levels [1, 2].

Percentage growth inhibition was calculated as:

$$[(Ti-Tz)/(C-Tz)] \times 100 \text{ for concentrations for which } Ti \geq Tz$$

$$[(Ti-Tz)/Tz] \times 100 \text{ for concentrations for which } Ti < Tz.$$

Results for each compound (One dose data) are reported as mean graph of the percent growth of the treated cells when compared with untreated control cells [1, 2]. The One-dose data (given below) is reported as a mean graph of the percent growth of treated cells. The number reported for the One-dose assay is growth relative to the no-drug control, and relative to the time zero number of cells. This allows detection of both growth inhibition (values between 0 and 100) and lethality

(values less than 0). For example, a value of 100 means no growth inhibition. A value of 40 would mean 60% growth inhibition. A value of 0 means no net growth over the course of the experiment. A value of -40 would mean 40% lethality. A value of -100 means all cells are dead.

**SD Table IV.** The *in vitro* anticancer analysis results for the CHP series

| CANCER CELL                | SUB PANEL | Growth Percentage |              |             |             |              |
|----------------------------|-----------|-------------------|--------------|-------------|-------------|--------------|
|                            |           | CHP-SAL           | CHP-4MO-SAL  | CHP-5MO-SAL | CHP-5CI-SAL | CHP-DiCI-SAL |
| Leukemia                   | K-562     | <u>58.35</u>      | 88.68        | 94.10       | 103.71      | 85.98        |
| Non-Small Cell Lung Cancer | NCI-H460  | <u>66.95</u>      | 94.39        | 113.07      | 105.60      | 105.82       |
|                            | NCI-H522  | 82.42             | <u>66.21</u> | 96.24       | 76.64       | 95.79        |
| Colon Cancer               | HCT-116   | <u>53.13</u>      | 73.44        | 100.36      | 97.30       | 78.22        |
|                            | HCT-15    | <u>45.96</u>      | 92.62        | 104.58      | 104.14      | 92.22        |
| CNS Cancer                 | U251      | <u>68.50</u>      | 89.65        | 103.20      | 93.56       | 96.84        |
| Prostate Cancer            | PC-3      | <u>56.97</u>      | 69.59        | 102.01      | 84.41       | 92.15        |
| Breast Cancer              | T-47D     | 91.92             | <u>67.62</u> | 109.60      | 102.04      | 83.58        |

The results of the single dose study for the 5 selected spirobibenzopyrans from the CHX series have been tabulated below in SD table V.

| CANCER CELL                | SUB PANEL | Growth Percentage |               |             |             |              |
|----------------------------|-----------|-------------------|---------------|-------------|-------------|--------------|
|                            |           | CHX-SAL           | CHX-4MO-SAL   | CHX-5MO-SAL | CHX-5CI-SAL | CHX-DiCI-SAL |
| Leukemia                   | CCRF-CEM  | <u>18.28</u>      | <u>5.97</u>   | 88.31       | 96.34       | <u>45.36</u> |
|                            | HL-60(TB) | <u>8.47</u>       | <u>7.56</u>   | 99.59       | 94.36       | 87.67        |
|                            | K-562     | <u>15.32</u>      | <u>23.50</u>  | 94.85       | 87.10       | 75.88        |
|                            | MOLT-4    | <u>17.51</u>      | <u>-3.56</u>  | 89.70       | 84.23       | 80.56        |
|                            | RPMI-8226 | <u>26.01</u>      | <u>-20.58</u> | 93.55       | 107.15      | 79.43        |
|                            | SR        | <u>6.44</u>       | <u>4.94</u>   | 97.09       | 100.20      | <u>63.19</u> |
| Non-Small Cell Lung Cancer | A549/ATCC | <u>32.65</u>      | 75.02         | 96.33       | 88.36       | 100.56       |
|                            | EKVX      | <u>57.76</u>      | <u>39.65</u>  | 103.01      | 104.23      | 89.44        |
|                            | HOP-62    | <u>41.57</u>      | <u>41.40</u>  | 101.21      | 105.83      | 104.91       |
|                            | HOP-92    | <u>61.42</u>      | <u>26.64</u>  | 105.10      | 90.98       | <u>55.63</u> |
|                            | NCI-H226  | <u>56.44</u>      | <u>64.09</u>  | 97.30       | 99.10       | 97.10        |
|                            | NCI-H23   | <u>42.30</u>      | <u>48.27</u>  | 97.16       | 98.66       | 105.59       |
|                            | NCI-H322M | <u>50.79</u>      | 80.84         | 106.32      | 108.23      | 87.65        |
|                            | NCI-H460  | <u>13.47</u>      | <u>14.25</u>  | 105.25      | 103.73      | 108.43       |
| Colon Cancer               | NCI-H522  | <u>3.90</u>       | <u>20.45</u>  | 101.58      | 76.84       | 102.48       |
|                            | COLO 205  | <u>25.44</u>      | <u>-9.95</u>  | 111.27      | 104.18      | 115.35       |
|                            | HCC-2998  | <u>58.40</u>      | <u>57.94</u>  | 102.97      | 103.67      | 100.49       |

|                    |                 |               |               |        |        |        |
|--------------------|-----------------|---------------|---------------|--------|--------|--------|
|                    | HCT-116         | <u>23.99</u>  | <u>19.97</u>  | 94.74  | 93.46  | 96.55  |
|                    | HCT-15          | <u>20.14</u>  | <u>12.83</u>  | 104.56 | 100.79 | 76.56  |
|                    | HT29            | <u>5.93</u>   | <u>8.16</u>   | 97.57  | 88.84  | 112.44 |
|                    | KM12            | <u>19.78</u>  | <u>-5.69</u>  | 91.22  | 102.25 | 96.39  |
|                    | SW-620          | <u>18.11</u>  | <u>16.61</u>  | 94.58  | 98.47  | 99.99  |
| CNS<br>Cancer      | SF-268          | <u>31.56</u>  | <u>38.52</u>  | 97.90  | 100.10 | 77.33  |
|                    | SF-295          | <u>11.30</u>  | <u>78.63</u>  | 99.15  | 100.22 | 98.49  |
|                    | SF-539          | <u>7.81</u>   | 84.49         | 114.62 | 100.50 | 90.77  |
|                    | SNB-19          | <u>27.44</u>  | <u>54.71</u>  | 105.09 | 102.91 | 88.84  |
|                    | SNB-75          | <u>22.99</u>  | 74.56         | 107.33 | 82.64  | 98.36  |
|                    | U251            | <u>26.46</u>  | <u>34.95</u>  | 102.25 | 94.84  | 86.99  |
| Melanoma           | LOX IMVI        | <u>22.99</u>  | <u>-32.06</u> | 97.19  | 97.45  | 83.75  |
|                    | MALME-3M        | <u>56.77</u>  | <u>70.32</u>  | 111.16 | 109.43 | 103.68 |
|                    | M14             | <u>19.15</u>  | <u>31.51</u>  | 96.01  | 102.54 | 98.79  |
|                    | MDA-MB-435      | <u>-41.60</u> | <u>-10.37</u> | 103.06 | 109.31 | 105.19 |
|                    | SK-MEL-2        | <u>36.05</u>  | <u>15.69</u>  | 117.14 | 89.48  | 108.02 |
|                    | SK-MEL-28       | <u>54.24</u>  | <u>62.98</u>  | 97.48  | 114.26 | 95.27  |
|                    | SK-MEL-5        | <u>19.96</u>  | <u>40.27</u>  | 98.77  | 99.67  | 97.86  |
|                    | UACC-257        | <u>40.07</u>  | <u>52.52</u>  | 89.70  | 97.04  | 99.51  |
|                    | UACC-62         | <u>14.54</u>  | <u>14.82</u>  | 103.55 | 99.18  | 95.13  |
| Ovarian<br>Cancer  | IGROV1          | <u>44.53</u>  | <u>41.44</u>  | 109.88 | 104.31 | 88.19  |
|                    | OVCAR-3         | <u>3.51</u>   | <u>5.62</u>   | 100.27 | 109.66 | 82.04  |
|                    | OVCAR-4         | <u>52.59</u>  | <u>55.15</u>  | 105.13 | 112.87 | 90.73  |
|                    | OVCAR-5         | 71.12         | <u>47.18</u>  | 102.00 | 105.05 | 109.16 |
|                    | OVCAR-8         | <u>38.51</u>  | <u>47.71</u>  | 99.51  | 96.66  | 89.11  |
|                    | NCI/ADR-RES     | <u>11.57</u>  | <u>21.65</u>  | 102.73 | 105.49 | 95.20  |
|                    | SK-OV-3         | <u>30.85</u>  | <u>60.13</u>  | 105.27 | 103.45 | 107.84 |
| Renal<br>Cancer    | 786-0           | <u>26.44</u>  | <u>38.70</u>  | 97.32  | 97.54  | 102.42 |
|                    | A498            | <u>5.61</u>   | 69.76         | 102.61 | 99.78  | 89.89  |
|                    | ACHN            | <u>47.34</u>  | <u>25.30</u>  | 95.73  | 110.56 | 96.41  |
|                    | CAKI-1          | <u>27.21</u>  | -             | 94.96  | -      | 98.36  |
|                    | RXF 393         | <u>9.77</u>   | <u>15.96</u>  | 101.32 | 96.52  | 106.92 |
|                    | SN12C           | <u>34.38</u>  | <u>44.06</u>  | 110.33 | 100.10 | 96.28  |
|                    | TK-10           | <u>55.40</u>  | <u>46.97</u>  | 112.95 | 91.51  | 111.64 |
|                    | UO-31           | <u>43.31</u>  | <u>36.31</u>  | 95.56  | 86.54  | 84.11  |
| Prostate<br>Cancer | PC-3            | <u>34.65</u>  | <u>23.55</u>  | 93.86  | 86.42  | 69.95  |
|                    | DU-145          | <u>28.07</u>  | <u>33.91</u>  | 109.02 | 108.75 | 105.70 |
| Breast<br>Cancer   | MCF7            | <u>13.51</u>  | <u>8.63</u>   | 94.21  | 94.43  | 84.02  |
|                    | MDA-MB-231/ATCC | <u>43.53</u>  | <u>32.03</u>  | 121.22 | 101.04 | 98.52  |
|                    | HS 578T         | <u>33.37</u>  | <u>45.03</u>  | 104.52 | 98.47  | 94.21  |
|                    | BT-549          | <u>26.39</u>  | <u>35.03</u>  | 115.48 | 108.48 | 98.59  |

|  |            |              |              |       |        |       |
|--|------------|--------------|--------------|-------|--------|-------|
|  | T-47D      | <b>31.86</b> | <b>44.67</b> | 95.98 | 101.93 | 80.58 |
|  | MDA-MB-468 | <b>25.53</b> | <b>56.33</b> | 81.77 | 106.79 | 90.19 |

**SD Table V.** The *in vitro* anticancer analysis results for the CHX series.

The GI50 value (growth inhibitory activity) corresponds to the concentration of the compound causing 50% decrease in net cell growth, the TGI value (cytostatic activity) is the concentration of the compound resulting in total growth inhibition and LC50 value (cytotoxic activity) is the concentration of the compound causing net 50% loss of initial cells at the end of the incubation period of 48 h.

**SD Table VI.** The *in vitro* 5 dose analysis results for CHX-SAL and CHX-4MO-SAL.

|                            |           | CHX-SAL          | CHX-4MO-SAL | CHX-SAL | CHX-4MO-SAL | CHX-SAL          | CHX-4MO-SAL |
|----------------------------|-----------|------------------|-------------|---------|-------------|------------------|-------------|
| PANEL                      | CELL      | GI <sub>50</sub> |             | TGI     |             | LC <sub>50</sub> |             |
| Leukemia                   | CCRF-CEM  | 3.47             | 5.88        | 25.90   | >100        | >100             | >100        |
|                            | HL-60(TB) | 3.24             | >100        | >100    | >100        | >100             | >100        |
|                            | K-562     | 3.54             | >100        | >100    | >100        | >100             | >100        |
|                            | MOLT-4    | 3.65             | 5.81        | >100    | >100        | >100             | >100        |
|                            | RPMI-8226 | 3.38             | 6.12        | 15.00   | >100        | >100             | >100        |
|                            | SR        | 2.82             | 4.89        | >100    | >100        | >100             | >100        |
| Non-Small Cell Lung Cancer | A549/ATCC | 5.87             | >100        | >100    | >100        | >100             | >100        |
|                            | EKVX      | 5.49             | >100        | >100    | >100        | >100             | >100        |
|                            | HOP-62    | 3.80             | >100        | >100    | >100        | >100             | >100        |
|                            | NCI-H226  | >100             | <b>4.46</b> | >100    | >100        | >100             | >100        |
|                            | NCI-H23   | 6.20             | >100        | >100    | >100        | >100             | >100        |
|                            | NCI-H322M | 3.92             | >100        | >100    | >100        | >100             | >100        |
|                            | NCI-H460  | 3.47             | >100        | 16.40   | >100        | >100             | >100        |
|                            | NCI-H522  | 2.30             | >100        | 6.20    | >100        | >100             | >100        |
| Colon Cancer               | COLO 205  | 2.24             | >100        | 5.04    | >100        | >100             | >100        |
|                            | HCC-2998  | <b>1.03</b>      | >100        | 60.70   | >100        | >100             | >100        |
|                            | HCT-116   | 4.34             | -           | >100    | >100        | >100             | >100        |
|                            | HCT-15    | 3.68             | >100        | >100    | >100        | >100             | >100        |
|                            | HT29      | 3.52             | >100        | 17.90   | >100        | >100             | >100        |
|                            | KM12      | 3.61             | 18.70       | 56.70   | >100        | >100             | >100        |
|                            | SW-620    | 3.35             | >100        | 53.60   | >100        | >100             | >100        |
| CNS Cancer                 | SF-268    | 4.74             | >100        | >100    | >100        | >100             | >100        |
|                            | SF-295    | 3.99             | >100        | >100    | >100        | >100             | >100        |
|                            | SF-539    | 1.92             | >100        | 5.01    | >100        | >100             | >100        |
|                            | SNB-19    | 4.01             | >100        | >100    | >100        | >100             | >100        |
|                            | SNB-75    | 1.64             | -           | 5.84    | >100        | >100             | >100        |
|                            | U251      | 4.54             | >100        | >100    | >100        | >100             | >100        |
| Melanoma                   | LOX IMVI  | 3.88             | >100        | 28.00   | >100        | >100             | >100        |

|                 |                 |      |       |       |      |      |      |
|-----------------|-----------------|------|-------|-------|------|------|------|
|                 | MALME-3M        | 7.17 | >100  | >100  | >100 | >100 | >100 |
|                 | M14             | 3.37 | >100  | >100  | >100 | >100 | >100 |
|                 | MDA-MB-435      | 1.64 | 5.52  | 4.67  | >100 | >100 | >100 |
|                 | SK-MEL-2        | 4.31 | >100  | 25.60 | >100 | >100 | >100 |
|                 | SK-MEL-28       | 5.22 | >100  | >100  | >100 | >100 | >100 |
|                 | SK-MEL-5        | 3.37 | 13.60 | 24.20 | >100 | >100 | >100 |
|                 | UACC-257        | 5.49 | >100  | >100  | >100 | >100 | >100 |
|                 | UACC-62         | 2.91 | 4.50  | 82.50 | >100 | >100 | >100 |
| Ovarian Cancer  | IGROV1          | 5.36 | >100  | >100  | >100 | >100 | >100 |
|                 | OVCAR-3         | 3.06 | -     | >100  | >100 | >100 | >100 |
|                 | OVCAR-4         | 6.12 | >100  | >100  | >100 | >100 | >100 |
|                 | OVCAR-5         | 3.46 | >100  | >100  | >100 | >100 | >100 |
|                 | OVCAR-8         | 4.04 | >100  | >100  | >100 | >100 | >100 |
|                 | NCI/ADR-RES     | 3.18 | >100  | 55.70 | >100 | >100 | >100 |
|                 | SK-OV-3         | 3.52 | >100  | >100  | >100 | >100 | >100 |
| Renal Cancer    | 786-0           | 6.41 | >100  | >100  | >100 | >100 | >100 |
|                 | A498            | 2.76 | >100  | 13.10 | >100 | >100 | >100 |
|                 | ACHN            | 5.06 | >100  | >100  | >100 | >100 | >100 |
|                 | CAKI-1          | 3.71 | >100  | >100  | >100 | >100 | >100 |
|                 | RXF 393         | 2.85 | >100  | 8.77  | >100 | >100 | >100 |
|                 | SN12C           | 4.42 | >100  | >100  | >100 | >100 | >100 |
|                 | TK-10           | 9.87 | >100  | >100  | >100 | >100 | >100 |
|                 | UO-31           | 4.86 | >100  | >100  | >100 | >100 | >100 |
| Prostate Cancer | PC-3            | 4.00 | >100  | >100  | >100 | >100 | >100 |
|                 | DU-145          | 3.73 | >100  | 69.10 | >100 | >100 | >100 |
| Breast Cancer   | MCF7            | 3.03 | >100  | 60.60 | >100 | >100 | >100 |
|                 | MDA-MB-231/ATCC | 4.23 | 4.80  | 45.50 | >100 | >100 | >100 |
|                 | HS 578T         | 3.03 | >100  | -     | >100 | >100 | >100 |
|                 | BT-549          | 3.73 | >100  | 73.70 | >100 | >100 | >100 |
|                 | T-47D           | 2.46 | 4.70  | >100  | >100 | >100 | >100 |
|                 | MDA-MB-468      | 5.42 | >100  | 69.10 | >100 | >100 | >100 |

***In-vitro* anti-cancer activity at 10µM against NCI 60 cell line panel.(One dose study)**

CHP-SAL

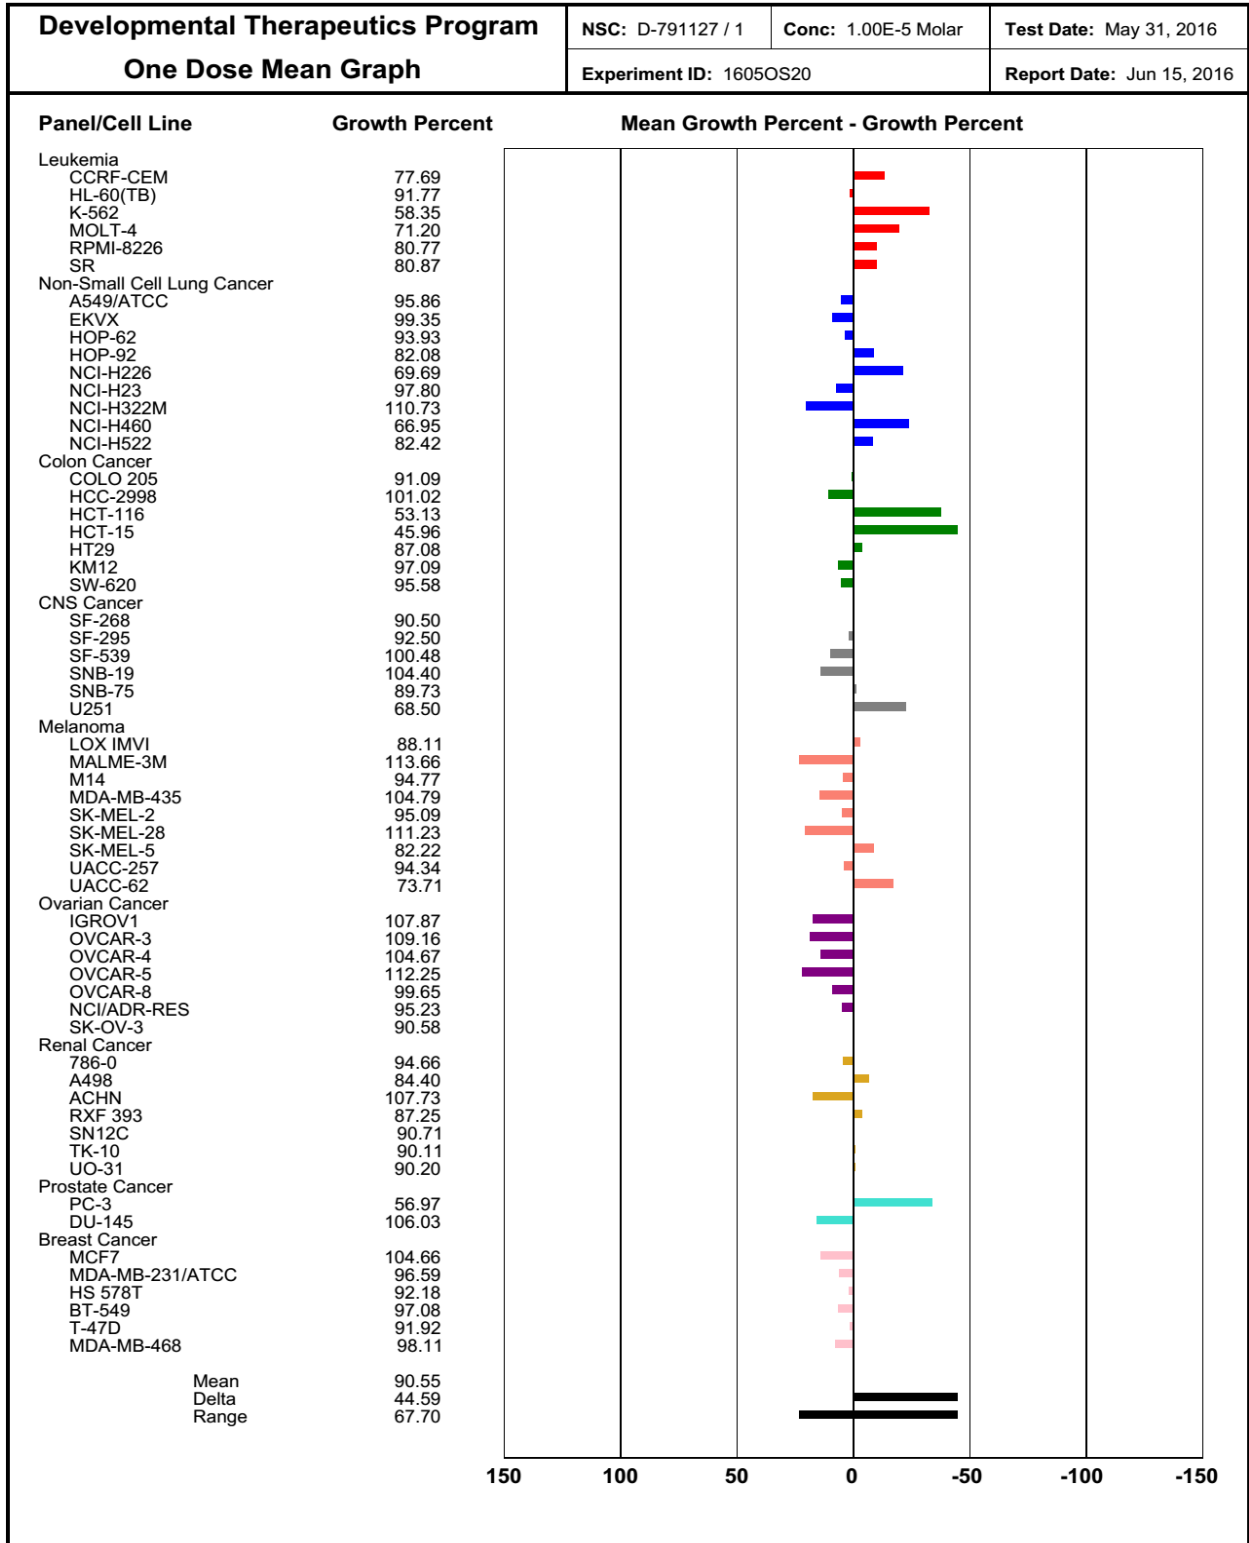

**In-vitro anti-cancer activity at 10µM against NCI 60 cell line panel.**

CHP-4MO-SAL

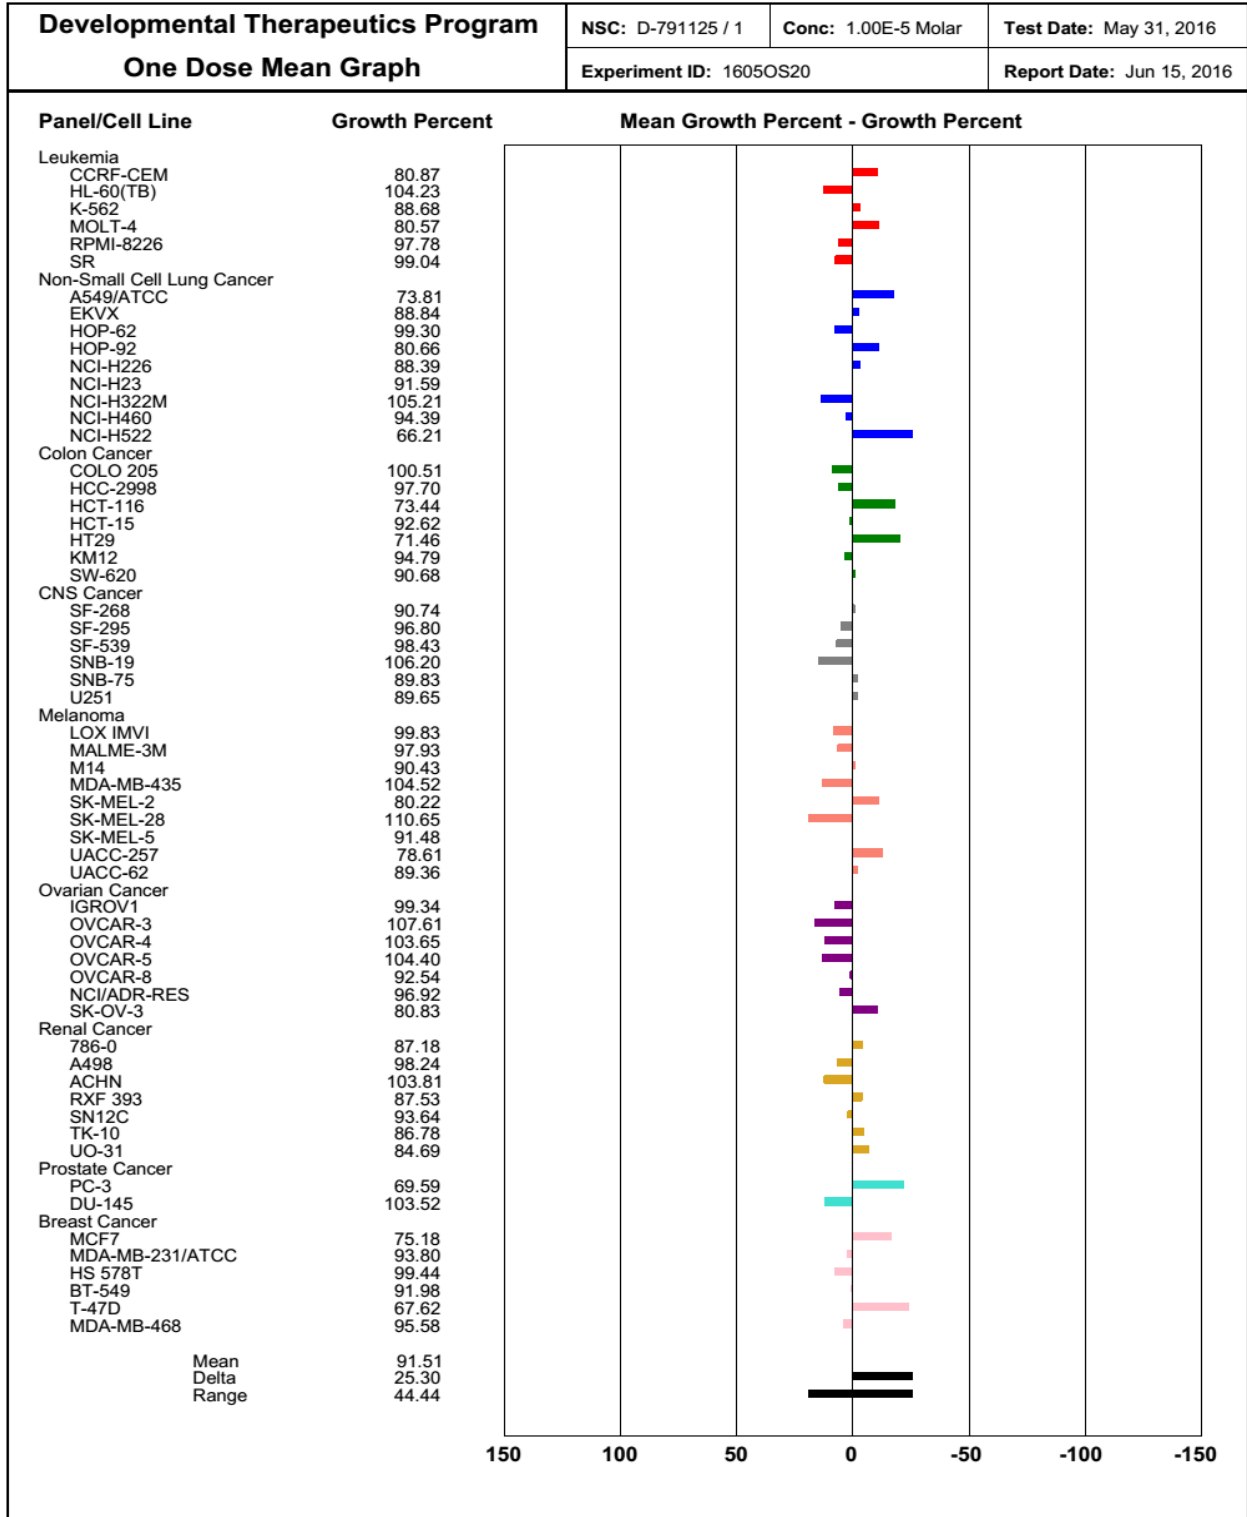

***In-vitro* anti-cancer activity at 10µM against NCI 60 cell line panel.**

CHP-5Cl-SAL

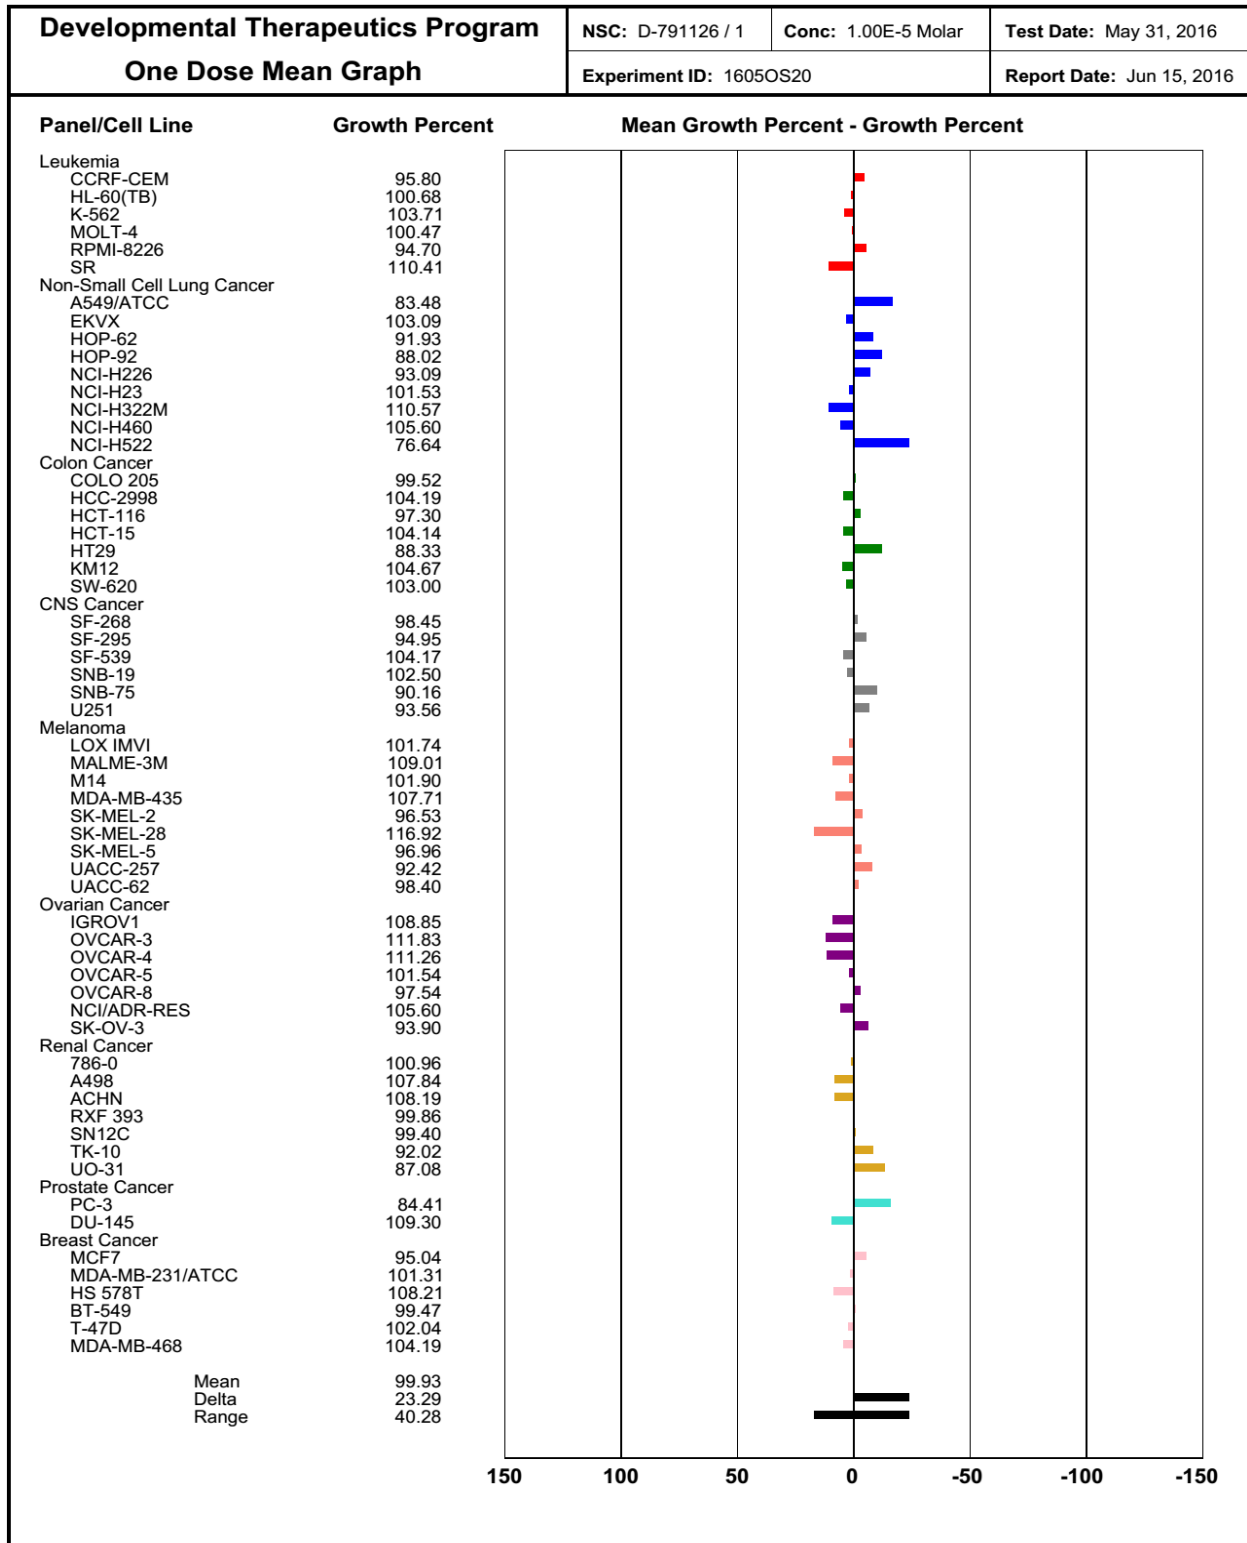



**In-vitro anti-cancer activity at 10µM against NCI 60 cell line panel.**

CHP-5MO-SAL

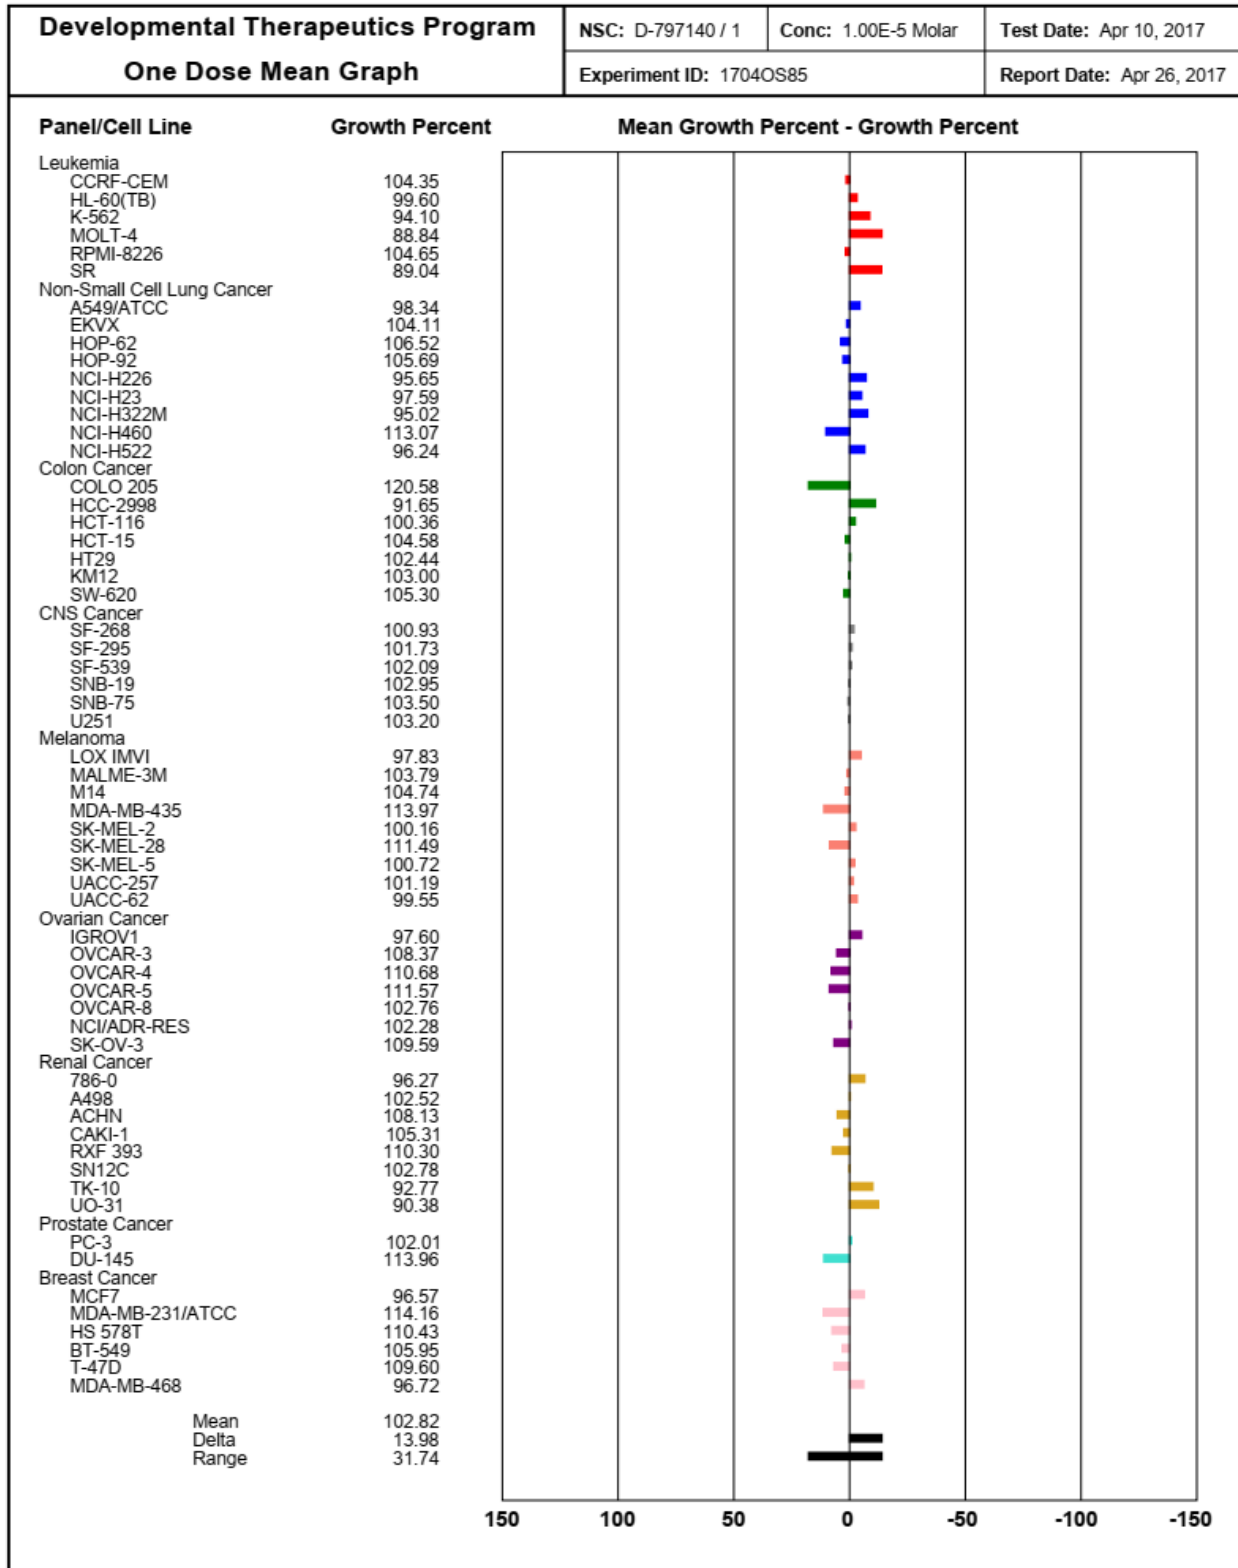

***In-vitro* anti-cancer activity at 10µM against NCI 60 cell line panel.**

CHP-DiCl-SAL

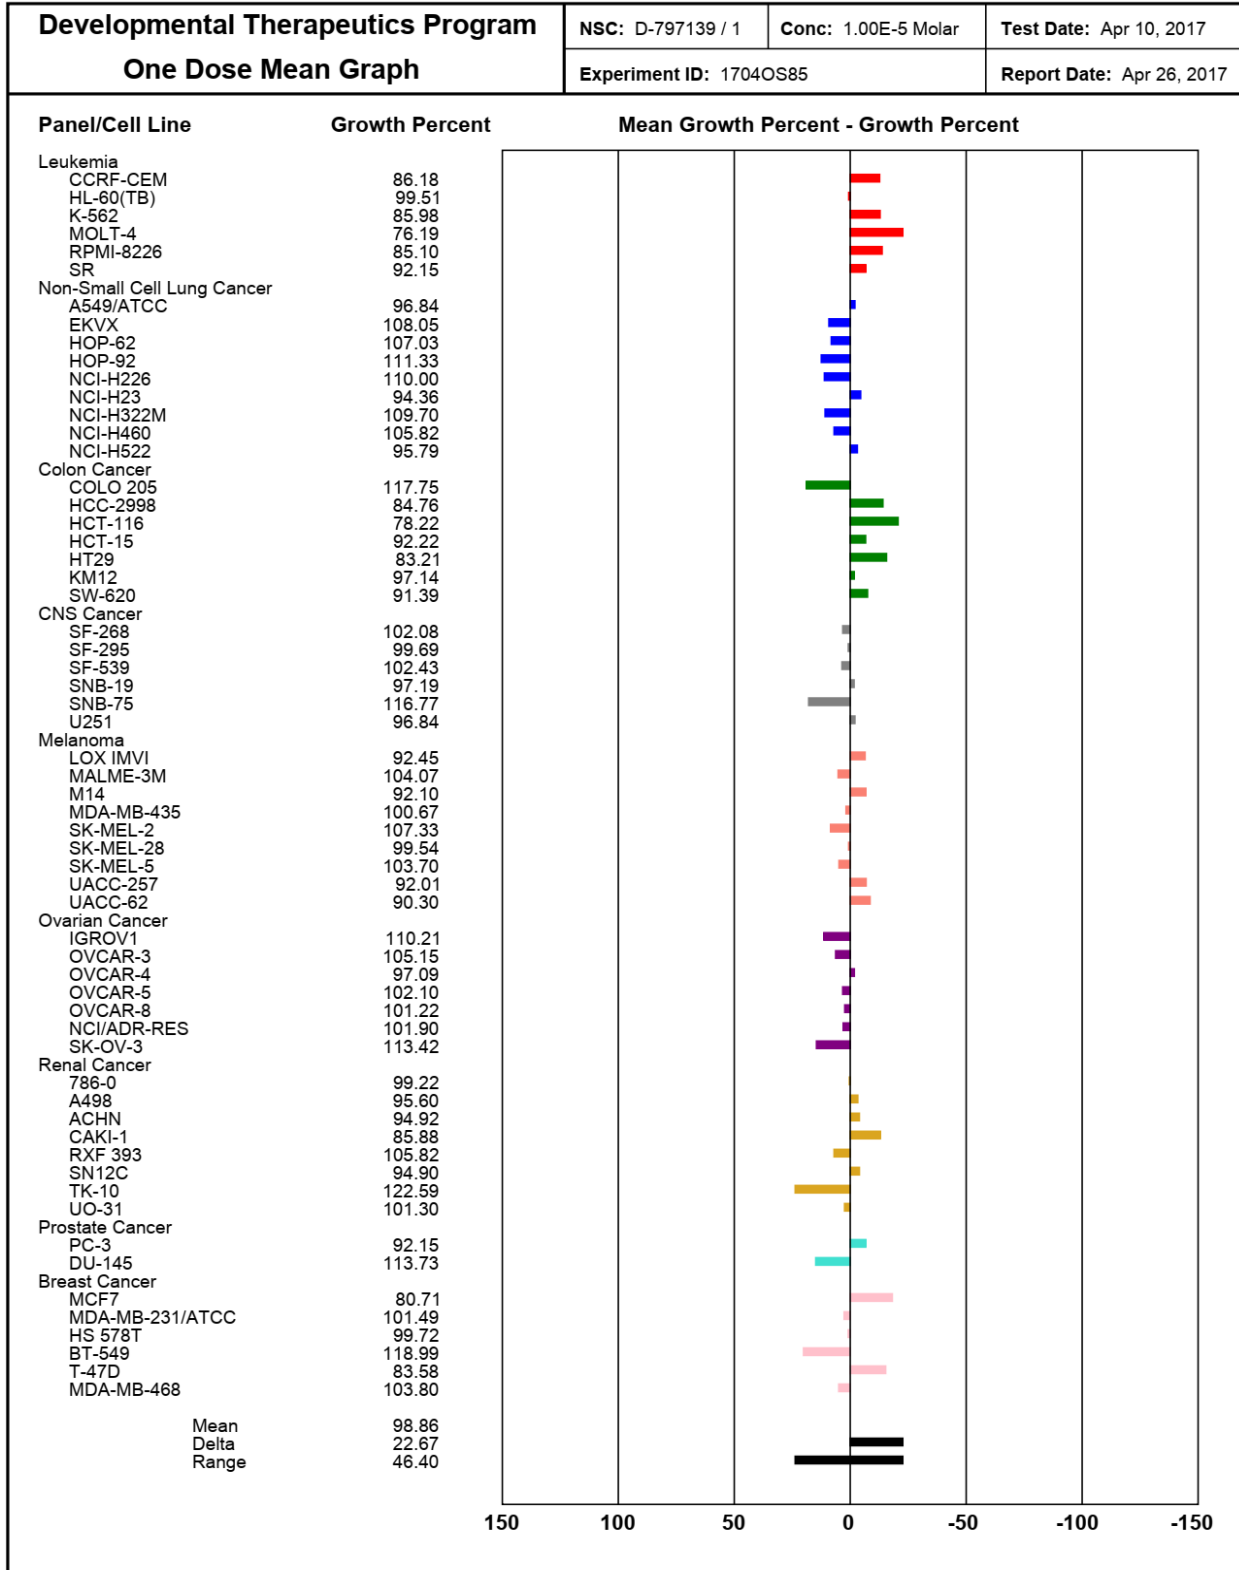

**In-vitro anti-cancer activity at 10µM against NCI 60 cell line panel.**

CHX-SAL

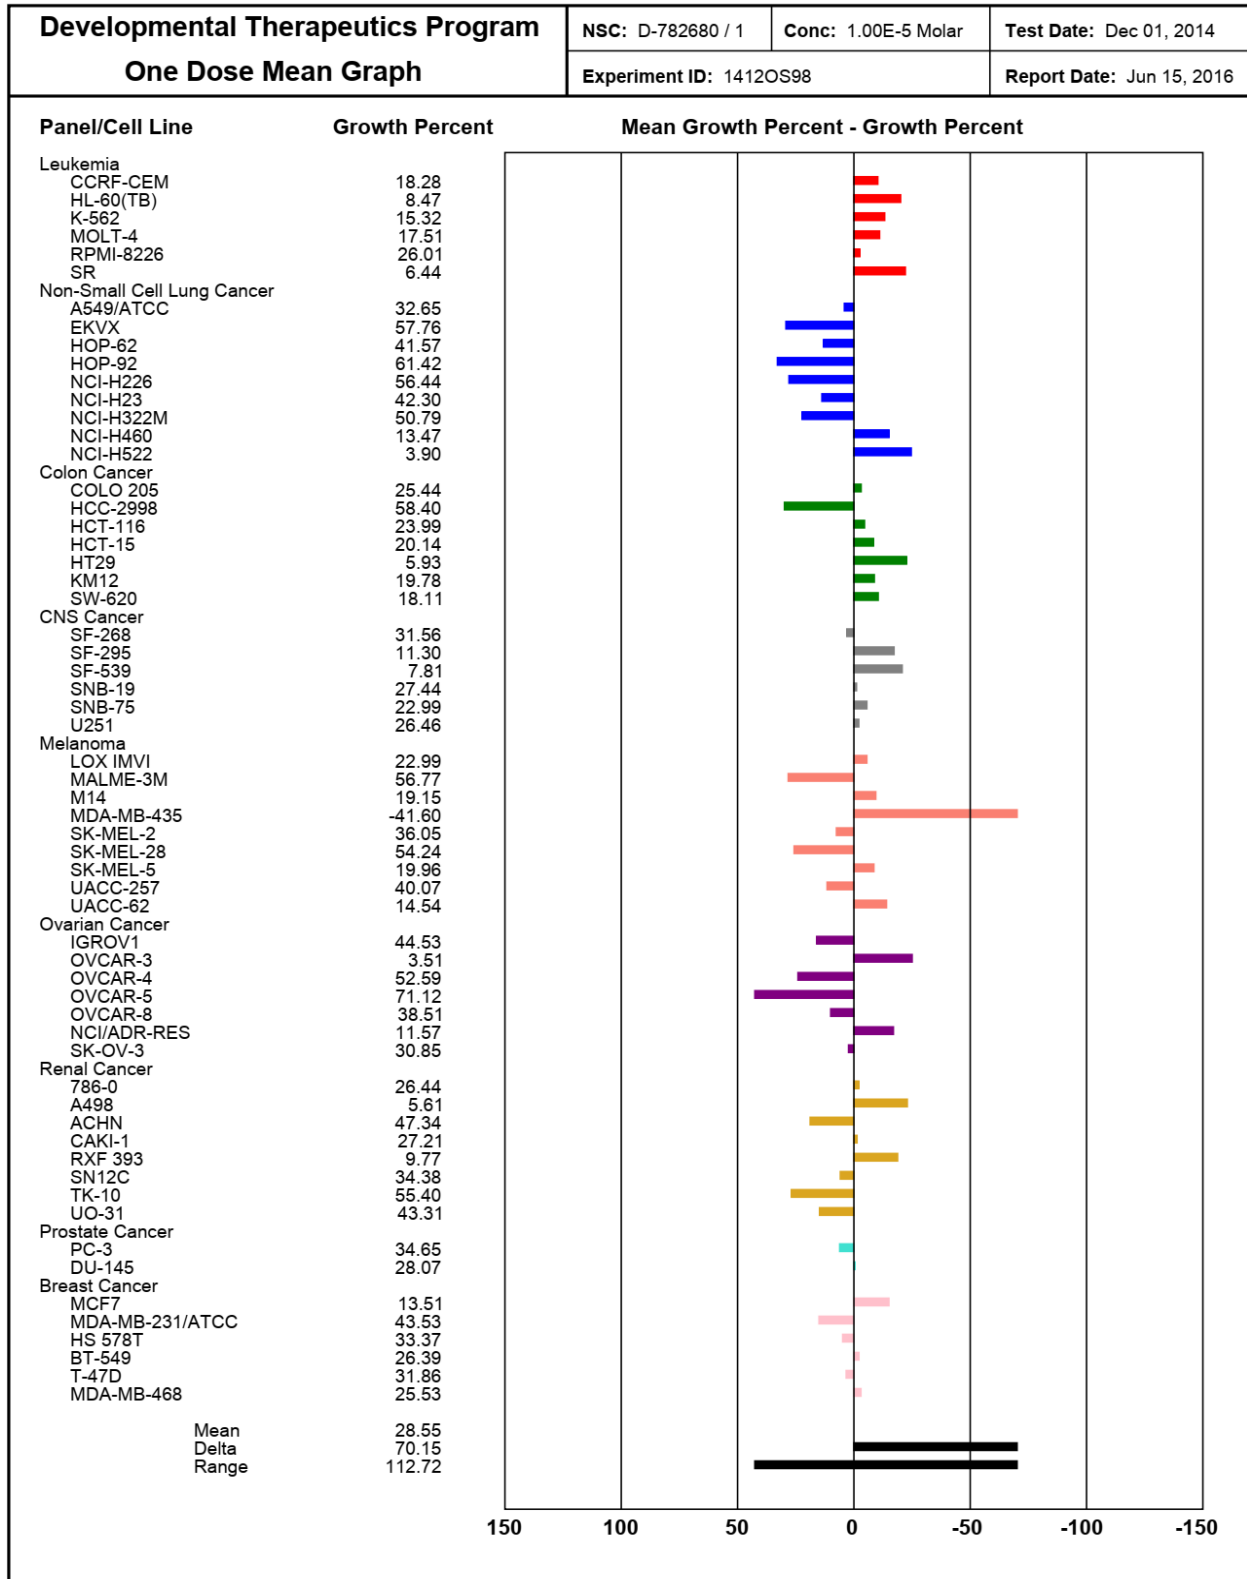

**In-vitro anti-cancer activity at 10µM against NCI 60 cell line panel.**

CHX-4MO-SAL

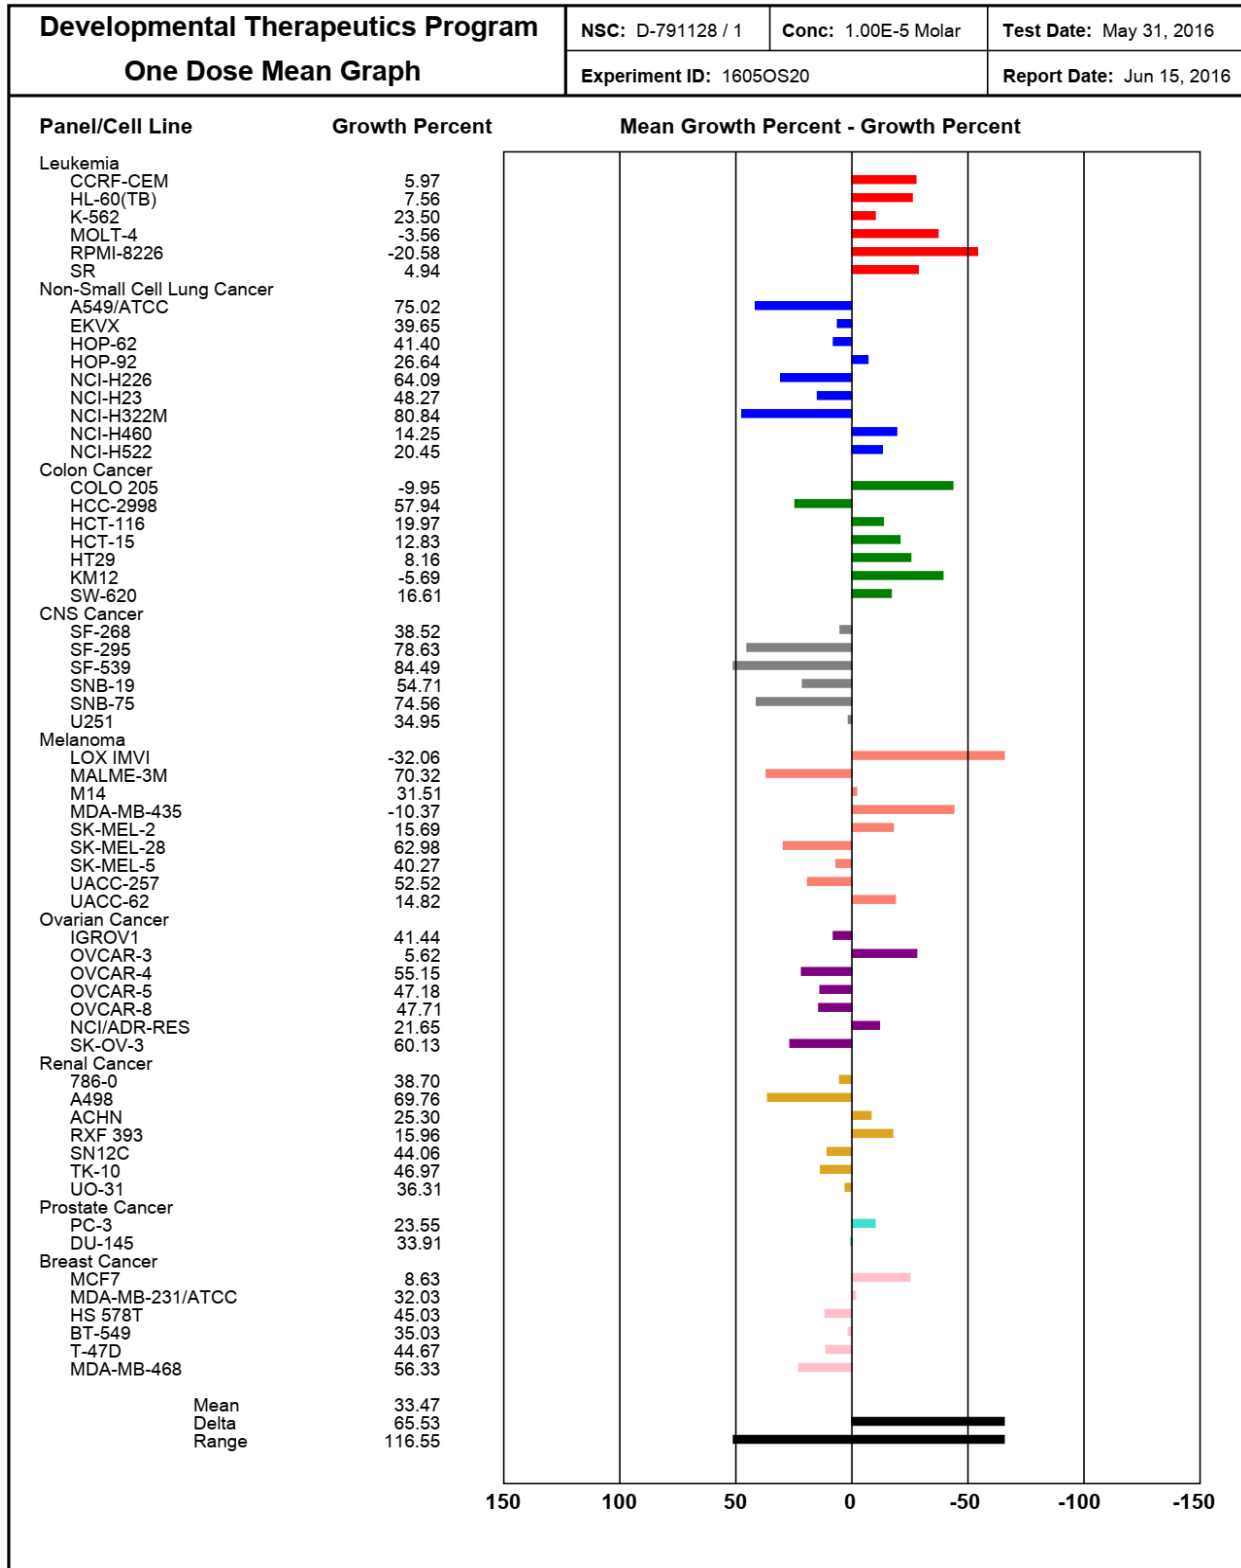

**In-vitro anti-cancer activity at 10µM against NCI 60 cell line panel.**

CHX-5MO-SAL

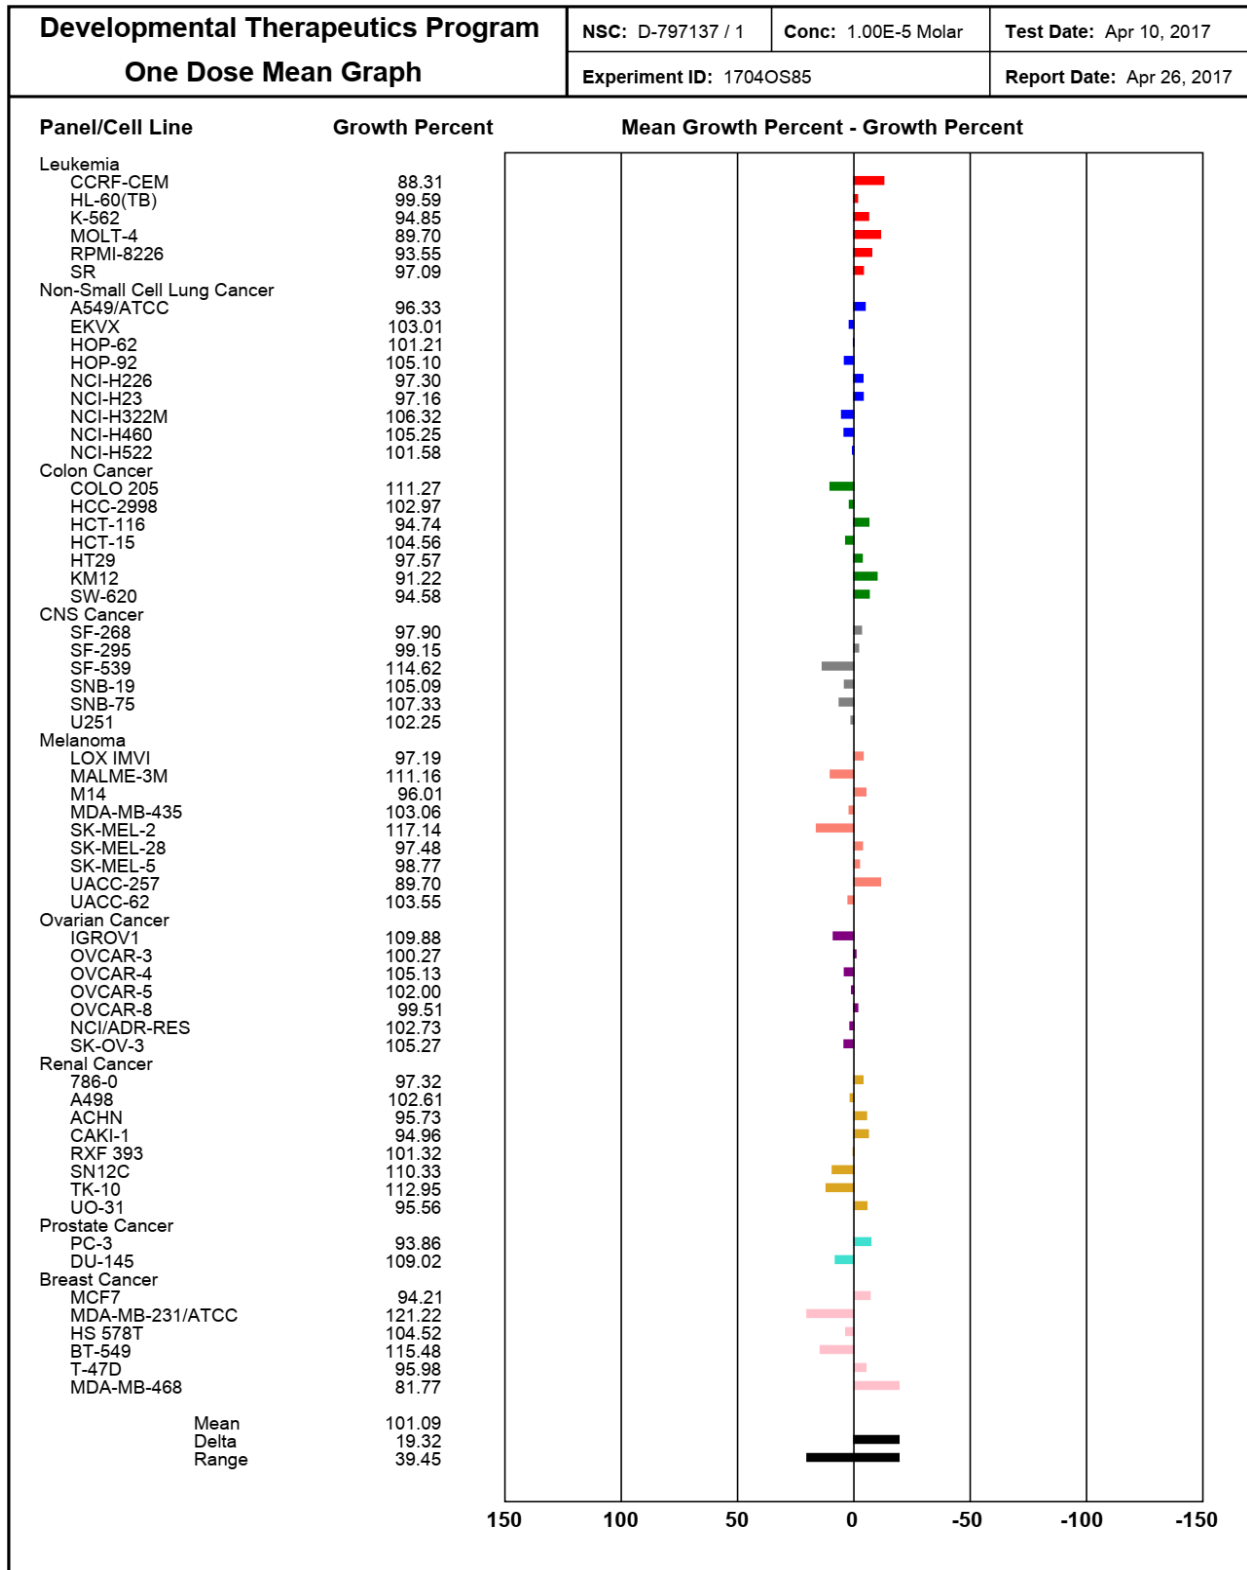

**In-vitro anti-cancer activity at 10µM against NCI 60 cell line panel.**

CHX-5CI-SAL

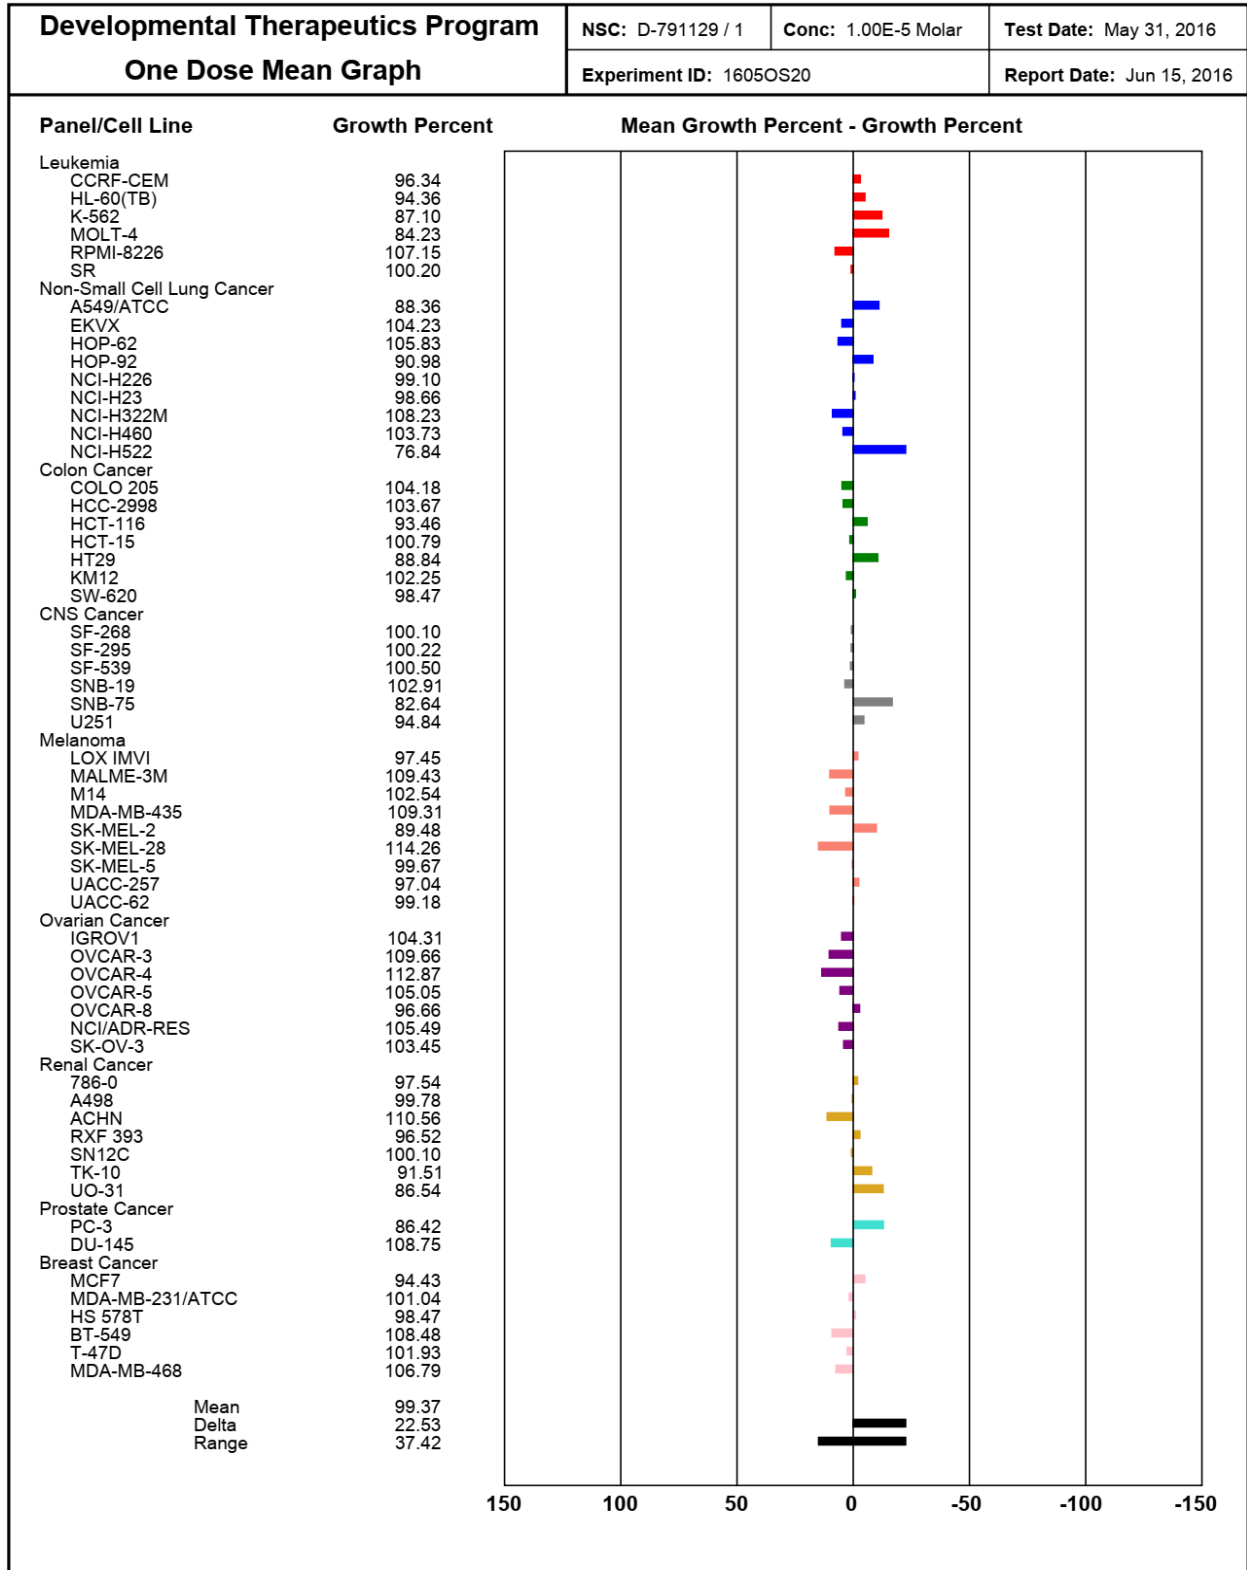

**In-vitro anti-cancer activity at 10µM against NCI 60 cell line panel.**

CHX-DiCl-SAL

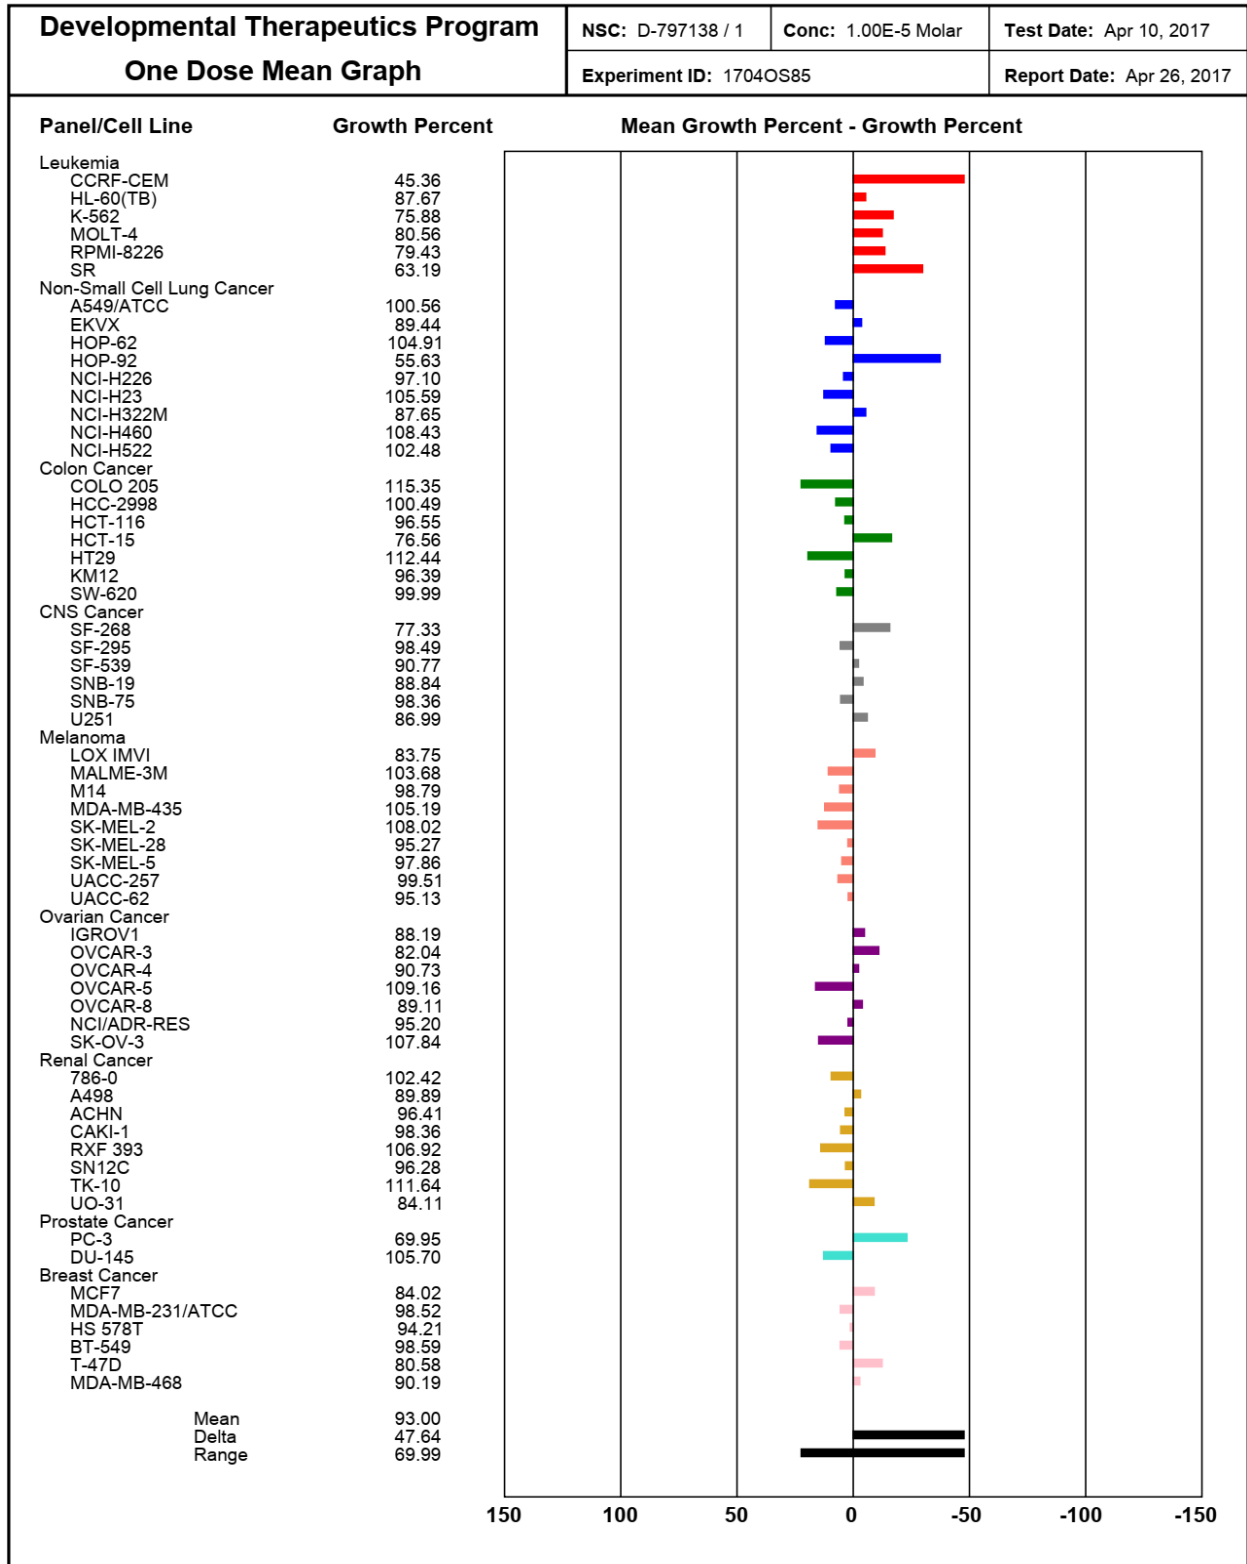

***In-vitro* anti-cancer activity against NCI 60 cell line panel – five dose study.**

**CHX-SAL**

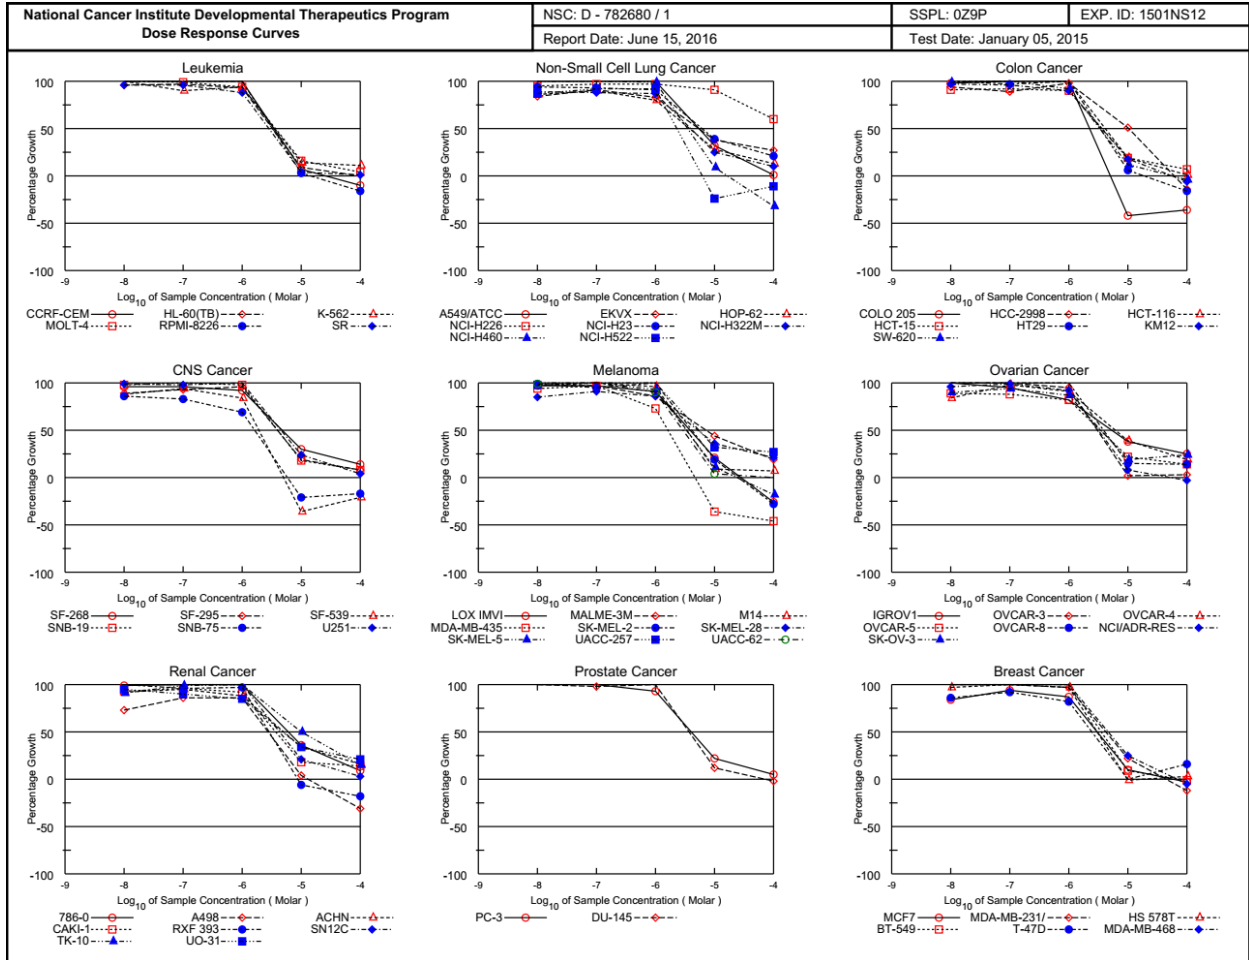





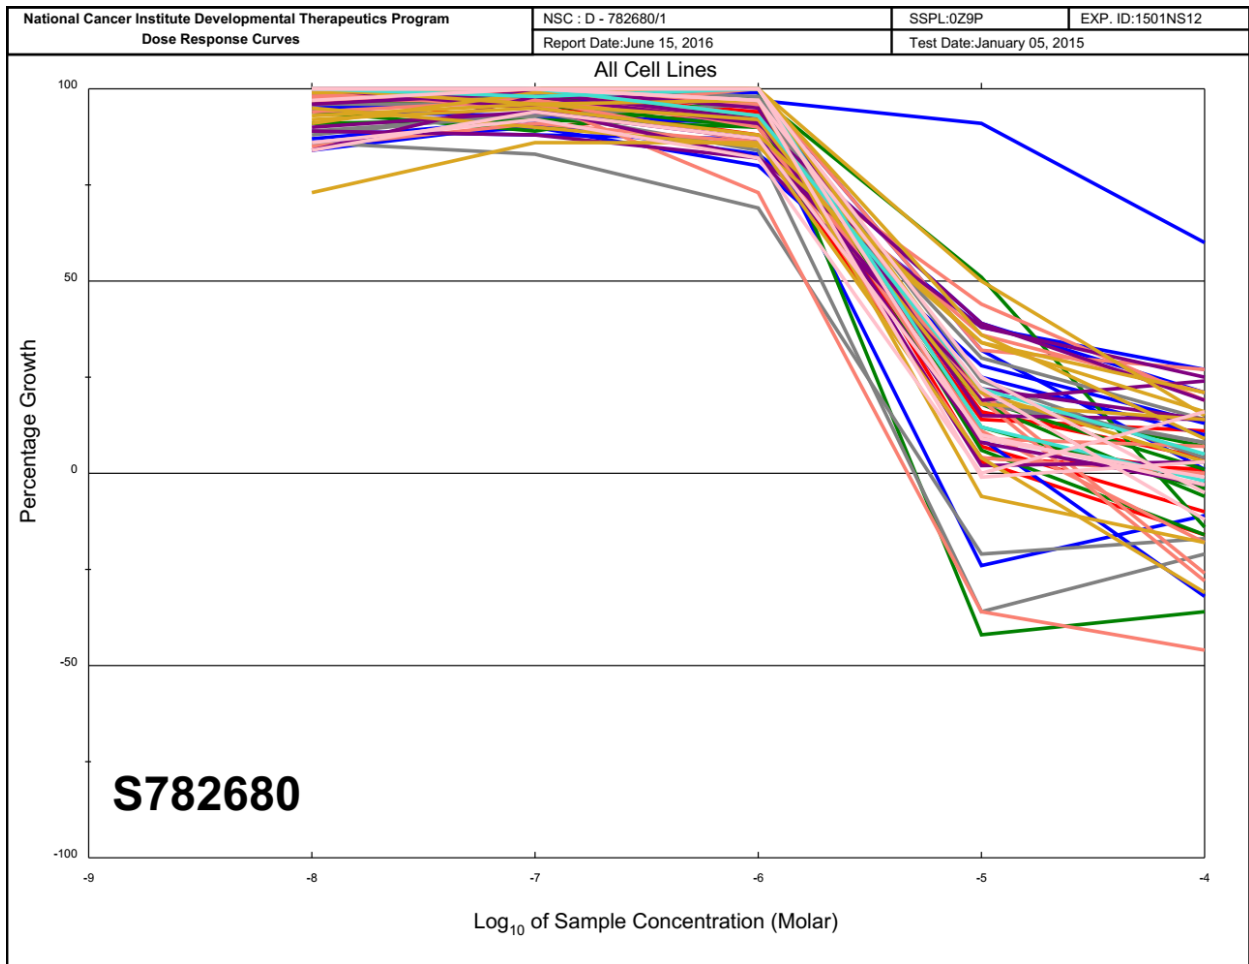

*In-vitro* anti-cancer activity against NCI 60 cell line panel – five dose study.

CHX--4MO-SAL

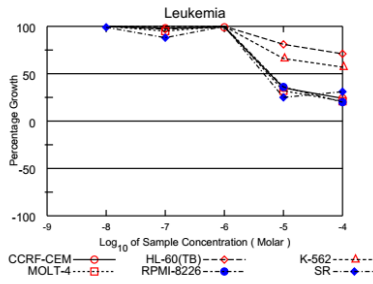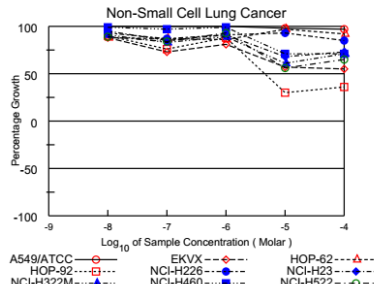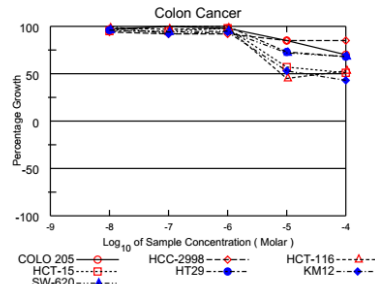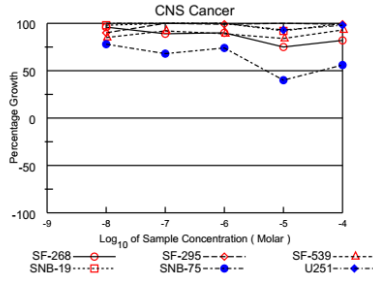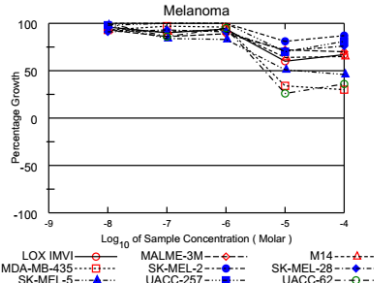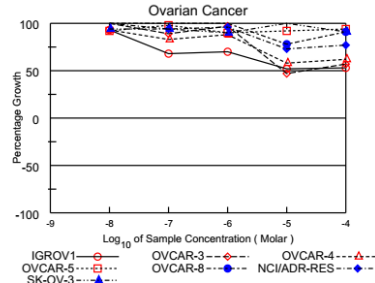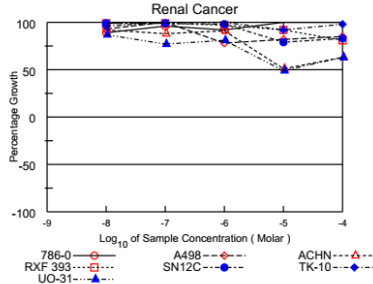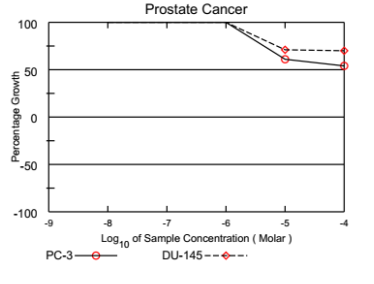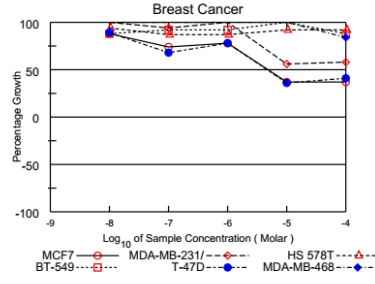



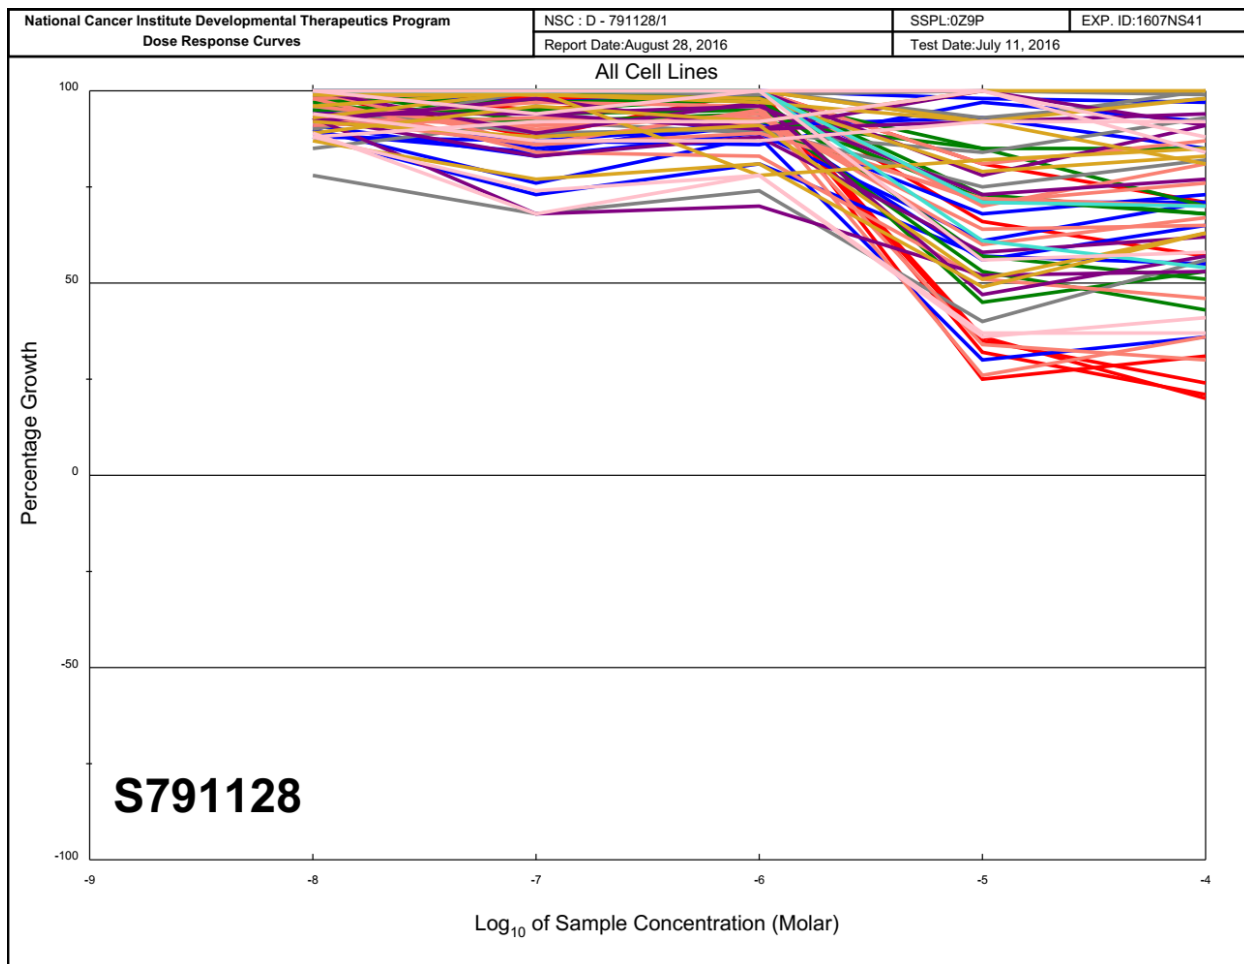

## References

1. Monks A, Scudiero D, Skehan P *et al.* J. Natl. Cancer Inst., 1991, 83(11), 757-766.
2. Grever MR, Schepartz SA, Chabner BA. Seminars in oncology, 1992, 19(6), 622-638.

### 5. Computational studies

The spirobibenzopyrans used for the studies namely: CHP-5Cl-SAL, and CHP-5MO-SAL were modelled using GaussView (5.0.8) <sup>5</sup>. The energy minimization of these molecules has been carried out using DFT theory in Gaussian 09 <sup>6</sup>, along with frequency studies. The 10 spirobibenzopyrans selected for the *in vitro* analysis were then evaluated for their drug likeness by testing their Lipinski's parameters at:

<http://www.scfbioitd.res.in/software/drugdesign/lipinski.jsp> <sup>7,8</sup>.

| Label | Experimental | Gaussian |      |
|-------|--------------|----------|------|
| H-12  | 7.20         | 7.54     |      |
| H-10  | 7.10         | 7.47     |      |
| H-11  | 6.95         | 7.36     |      |
| H-13  | 6.80         | 7.15     |      |
| H-8   | 6.70         | 7.05     |      |
| H-6   | 2.40         | 2.70     | 3.28 |
| H-3   | 2.60         | 2.57     | 2.88 |
| H-4   | 2.10         | 1.97     |      |
| H-5   | 1.55         | 1.62     |      |

SD table VII: <sup>1</sup>H-NMR comparison for CHP-SAL

| Bond lengths (in Å) | EXPT | Gaussian |
|---------------------|------|----------|
| C11-C1              | 1.75 | 1.76     |
| O1-C4               | 1.37 | 1.37     |
| O1-C5               | 1.44 | 1.44     |
| C1-C9               | 1.36 | 1.39     |
| C1-C2               | 1.37 | 1.39     |
| C2-C3               | 1.40 | 1.40     |
| C3-C4               | 1.39 | 1.40     |
| C3-C6               | 1.45 | 1.45     |
| C4-C8               | 1.38 | 1.39     |
| C5-C7               | 1.51 | 1.52     |
| C6-C7               | 1.33 | 1.34     |
| C7-C10              | 1.51 | 1.51     |
| C8-C9               | 1.33 | 1.39     |
| C10-C11             | 1.53 | 1.56     |
| C11-C11             | 1.51 | 1.53     |

SD table VIIIa: Bond lengths comparison for CHP-5Cl-SAL

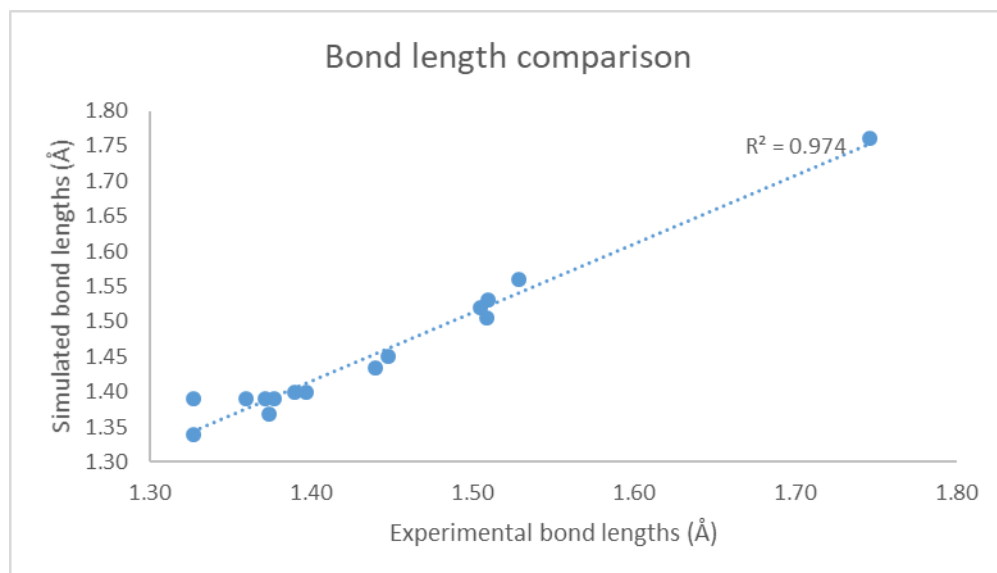

**Figure III: Bond lengths comparison for CHP-5Cl-SAL with regression analysis**

| <b>Bond angles (in degrees)</b> | <b>EXPT</b> | <b>Gaussian</b> |
|---------------------------------|-------------|-----------------|
| C4-O1-C5                        | 118.9       | 119.2           |
| C9-C1-C2                        | 121.8       | 121.2           |
| C9-C1-C11                       | 119.2       | 119.4           |
| C2-C1-C11                       | 119.0       | 119.4           |
| C1-C2-C3                        | 119.7       | 119.8           |
| C4-C3-C2                        | 118.0       | 118.7           |
| C4-C3-C6                        | 117.5       | 117.7           |
| C2-C3-C6                        | 124.4       | 123.5           |
| O1-C4-C8                        | 117.1       | 118.0           |
| O1-C4-C3                        | 121.2       | 120.7           |
| C8-C4-C3                        | 121.6       | 121.2           |
| O1-C5-O1                        | 107.5       | 108.3           |
| O1-C5-C7                        | 113.2       | 112.8           |
| O1-C5-C7                        | 103.4       | 104.6           |
| C7-C5-C7                        | 116.2       | 114.3           |
| C7-C6-C3                        | 122.0       | 121.7           |
| C6-C7-C5                        | 119.2       | 118.5           |
| C6-C7-C10                       | 123.8       | 124.0           |
| C5-C7-C10                       | 116.9       | 117.2           |
| C4-C8-C9                        | 119.2       | 119.7           |
| C1-C9-C8                        | 119.6       | 119.4           |
| C7-C10-C11                      | 113.1       | 114.9           |
| C11-C11-C10                     | 115.2       | 113.8           |

**SD table VIIIb: Bond angles comparison for CHP-5Cl-SAL**

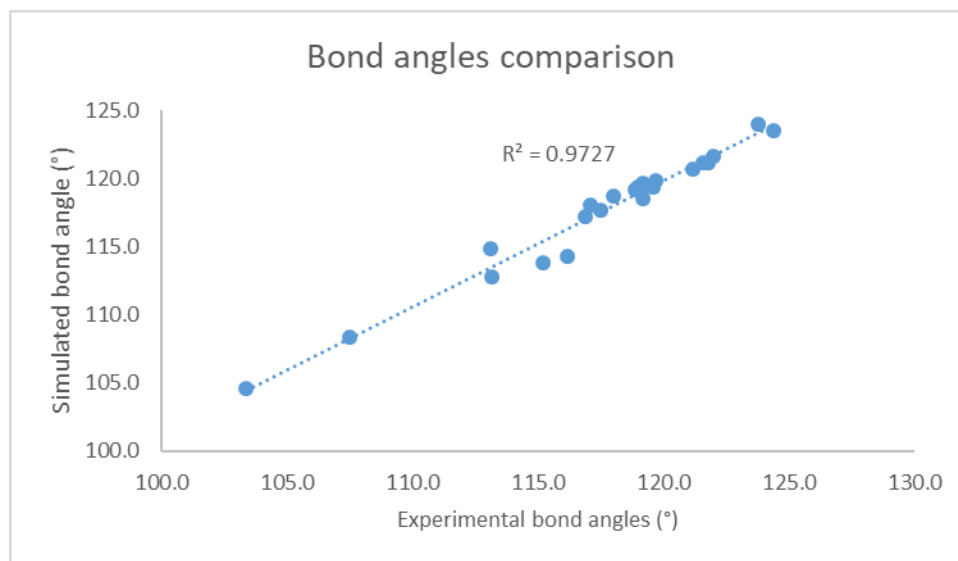

**Figure IV: Bond angles comparison for CHP-5Cl-SAL with regression analysis**

| <b>Bond lengths (in Å)</b> | <b>EXPT</b> | <b>Gaussian</b> |
|----------------------------|-------------|-----------------|
| O2-C21                     | 1.38        | 1.38            |
| O2-C1                      | 1.44        | 1.43            |
| O1-C2                      | 1.38        | 1.37            |
| O1-C1                      | 1.43        | 1.43            |
| O3-C5                      | 1.37        | 1.37            |
| O3-C22                     | 1.38        | 1.41            |
| C8-C9                      | 1.31        | 1.34            |
| C8-C7                      | 1.45        | 1.45            |
| C7-C6                      | 1.38        | 1.40            |
| C7-C2                      | 1.40        | 1.40            |
| C5-C6                      | 1.38        | 1.39            |
| C5-C4                      | 1.39        | 1.40            |
| C2-C3                      | 1.37        | 1.39            |
| C9-C1                      | 1.50        | 1.51            |
| C9-C10                     | 1.51        | 1.51            |
| C1-C14                     | 1.52        | 1.52            |
| C21-C20                    | 1.38        | 1.39            |
| C21-C16                    | 1.41        | 1.40            |
| C14-C15                    | 1.32        | 1.34            |
| C14-C13                    | 1.51        | 1.50            |
| C3-C4                      | 1.39        | 1.39            |
| C11-C12                    | 1.52        | 1.53            |
| C11-C10                    | 1.53        | 1.56            |
| C20-C19                    | 1.41        | 1.39            |
| C15-C16                    | 1.44        | 1.45            |



|         |      |      |
|---------|------|------|
| C16-C17 | 1.40 | 1.40 |
| C12-C13 | 1.54 | 1.56 |
| C17-C18 | 1.37 | 1.39 |
| C18-C19 | 1.39 | 1.40 |
| C18-O4  | 1.48 | 1.37 |
| O4-C23  | 1.42 | 1.41 |

**SD table IXa: Bond lengths comparison for CHP-5MO-SAL**

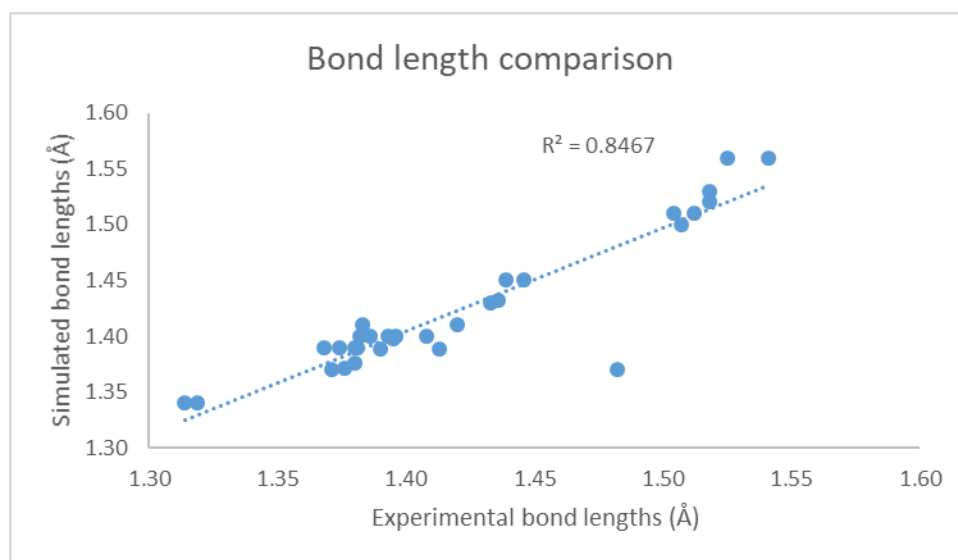

**Figure V: Bond lengths comparison for CHP-5MO-SAL with regression analysis**

| Bond angles (in degrees) | EXPT  | Gaussian |
|--------------------------|-------|----------|
| C21-O2-C1                | 120.0 | 121.0    |
| C2-O1-C1                 | 119.4 | 117.9    |
| C5-O3-C22                | 118.3 | 118.0    |
| C9-C8-C7                 | 122.4 | 121.3    |
| C6-C7-C2                 | 119.1 | 119.1    |
| C6-C7-C8                 | 123.6 | 123.3    |
| C2-C7-C8                 | 117.1 | 117.5    |
| O3-C5-C6                 | 115.7 | 115.5    |
| O3-C5-C4                 | 125.1 | 124.7    |
| C6-C5-C4                 | 119.2 | 119.7    |
| C5-C6-C7                 | 121.0 | 120.3    |
| C3-C2-O1                 | 118.1 | 118.2    |
| C3-C2-C7                 | 120.4 | 120.7    |
| O1-C2-C7                 | 121.2 | 120.9    |
| C8-C9-C1                 | 119.6 | 119.1    |
| C8-C9-C10                | 123.1 | 125.1    |
| C1-C9-C10                | 117.3 | 116.5    |
| O1-C1-O2                 | 108.0 | 108.8    |

|             |       |       |
|-------------|-------|-------|
| O1-C1-C9    | 113.1 | 112.2 |
| O2-C1-C9    | 103.7 | 103.0 |
| O1-C1-C14   | 104.1 | 105.4 |
| O2-C1-C14   | 114.1 | 112.9 |
| C9-C1-C14   | 114.1 | 114.4 |
| O2-C21-C20  | 116.4 | 118.2 |
| O2-C21-C16  | 120.1 | 120.8 |
| C20-C21-C16 | 123.3 | 120.7 |
| C15-C14-C13 | 123.7 | 121.1 |
| C15-C14-C1  | 119.7 | 119.2 |
| C13-C14-C1  | 116.6 | 116.5 |
| C2-C3-C4    | 119.7 | 119.7 |
| C5-C4-C3    | 120.4 | 120.4 |
| C12-C11-C10 | 114.5 | 114.0 |
| C21-C20-C19 | 116.9 | 119.6 |
| C9-C10-C11  | 112.4 | 113.0 |
| C14-C15-C16 | 121.6 | 122.7 |
| C17-C16-C21 | 117.6 | 119.3 |
| C17-C16-C15 | 123.2 | 123.4 |
| C21-C16-C15 | 119.2 | 117.2 |
| C11-C12-C13 | 114.1 | 115.6 |
| C14-C13-C12 | 113.2 | 113.0 |
| C18-C17-C16 | 120.7 | 120.1 |
| C17-C18-C19 | 120.9 | 119.7 |
| C18-C19-C20 | 120.6 | 120.5 |

**SD table IXb: Bond angles comparison for CHP-5MO-SAL**

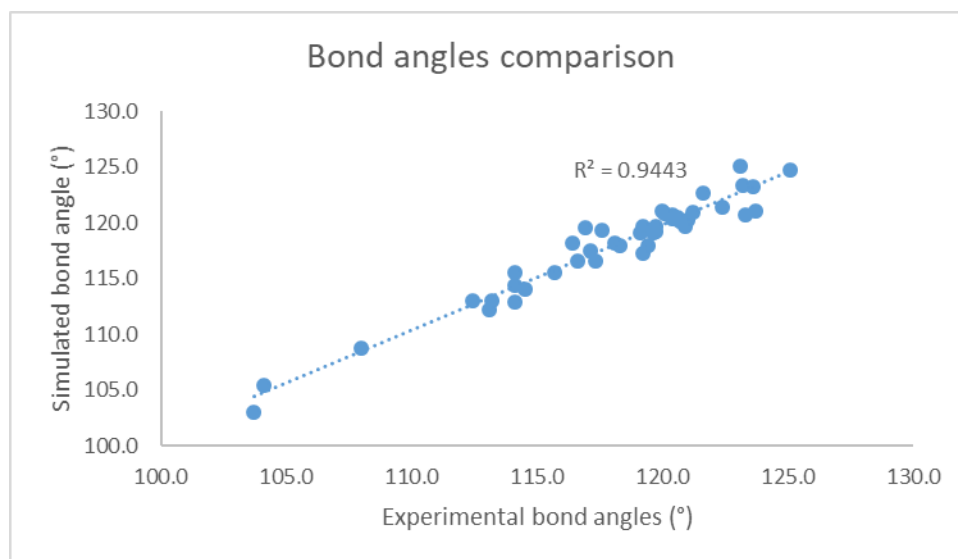

**Figure VI: Bond angles comparison for CHP-5MO-SAL with regression analysis**

**SD Table X.** Regression analysis of the observed IR values vs the computed IR values

| Molecule    | R <sup>2</sup> value for Observed IR vs Computed IR |
|-------------|-----------------------------------------------------|
| CHP-5MO-SAL | 0.8176                                              |
| CHP-5Cl-SAL | 0.7940                                              |

**SD Table XI.** Drug likeness score of the spirobibenzopyrans on the basis of Lipinski parameters

| Spirobibenzopyrans | Molecular mass | No. of hydrogen bond donors | No. of hydrogen bond acceptors | Log P | Molar refractivity |
|--------------------|----------------|-----------------------------|--------------------------------|-------|--------------------|
| CHP-SAL            | 302            | 0                           | 2                              | 5.21  | 91.29              |
| CHP-4MO-SAL        | 362            | 0                           | 4                              | 5.23  | 104.40             |
| CHP-5Cl-SAL        | 371            | 0                           | 2                              | 4.97  | 95.45              |
| CHP-5MO-SAL        | 362            | 0                           | 4                              | 5.23  | 104.40             |
| CHP-DiCl-SAL       | 440            | 0                           | 2                              | 4.73  | 99.61              |
| CHX-SAL            | 288            | 0                           | 2                              | 4.82  | 86.68              |
| CHX-4MO-SAL        | 348            | 0                           | 4                              | 4.84  | 99.78              |
| CHX-5MO-SAL        | 348            | 0                           | 4                              | 4.84  | 99.78              |
| CHX-5Cl-SAL        | 357            | 0                           | 2                              | 4.58  | 90.83              |
| CHX-DiCl-SAL       | 426            | 0                           | 2                              | 4.34  | 94.99              |

## References

1. Bruker A. SAINT-plus and SADABS. *USABruker AXS Inc, Madison, Wisconsin, USA*. 2004.
2. Sheldrick GM. A short history of SHELX. 2008;112-122. doi:10.1107/S0108767307043930
3. Spek AL. Structure validation in chemical crystallography. *Acta Crystallogr Sect D Biol Crystallogr*. 2009;65(Pt 2):148-155. doi:10.1107/S090744490804362X
4. Macrae CF, Bruno IJ, Chisholm JA, et al. Mercury CSD 2.0--new features for the visualization and investigation of crystal structures. *J Appl Crystallogr*. 2008;41(2):466-470.
5. Dennington RD, Keith TA, Millam JM, others. GaussView 5.0. 8. *Gaussian Inc*. 2008.
6. Gaussian09 RA. 1, MJ Frisch, GW Trucks, HB Schlegel, GE Scuseria, MA Robb, JR Cheeseman, G. Scalmani, V. Barone, B. Mennucci, GA Petersson et al., *Gaussian, Inc, Wallingford CT*. 2009.
7. Lipinski CA. Lead-and drug-like compounds: the rule-of-five revolution. *Drug Discov Today Technol*. 2004;1(4):337-341.
8. Jayaram B, Singh T, Mukherjee G, Mathur A, Shekhar S, Shekhar V. Sanjeevini: a freely accessible web-server for target directed lead molecule discovery. *BMC Bioinformatics*. 2012;13(17):S7.
